# Supplementary material for: Transfer of Galectin-3-Binding Protein via Epididymal Extracellular Vesicles Promotes Sperm Fertilizing Ability and Developmental Potential in the Domestic Cat Model
Source: Int J Mol Sci. 2023 Feb 4;24(4):3077. doi: 10.3390/ijms24043077 (PMC9966717; doi:10.3390/ijms24043077)
Supplement: Supplementary file 1 [file ijms-24-03077-s001.zip › Rowlison Supplemental File S2.xlsx]

## Sheet: Protein Report
Whole Epididymal Sample Analysis- Liquid Chromatography Mass Spectrometry
Identified Proteins (1245)	Accession Number	Molecular Weight	SpC 41364 25 kDa	SpC 41365 37 kDa	SpC 41366 50 kDa	SpC 41367 85 kDa
Serum albumin OS=Felis catus GN=ALB PE=1 SV=1	sp|P49064|ALBU_FELCA	69 kDa	54	89	243	57
Actin gamma 1 OS=Felis catus GN=ACTG1 PE=3 SV=1	tr|M3WRZ7|M3WRZ7_FELCA	42 kDa	43	209	82	58
Annexin OS=Felis catus GN=ANXA2 PE=3 SV=1	tr|M3W8I8|M3W8I8_FELCA	39 kDa	60	71	34	31
Tubulin beta chain OS=Felis catus GN=TUBB PE=3 SV=1	tr|M3X7Z9|M3X7Z9_FELCA	50 kDa	22	39	64	58
Heat shock protein 90 beta family member 1 OS=Felis catus GN=HSP90B1 PE=3 SV=1	tr|M3WK11|M3WK11_FELCA	93 kDa	4	33	31	112
Glutamine synthetase OS=Felis catus GN=GLUL PE=3 SV=1	tr|M3WDH0|M3WDH0_FELCA	45 kDa	29	81	29	8
Protein disulfide-isomerase OS=Felis catus GN=PDIA3 PE=3 SV=1	tr|M3W668|M3W668_FELCA	57 kDa	6	37	84	17
Pyruvate kinase OS=Felis catus GN=PKM PE=3 SV=1	tr|S4R157|S4R157_FELCA	58 kDa	6	32	64	39
Aldehyde dehydrogenase 1 family member A1 OS=Felis catus GN=ALDH1A1 PE=3 SV=1	tr|M3WAV4|M3WAV4_FELCA	55 kDa	9	38	75	13
Protein disulfide-isomerase OS=Felis catus GN=P4HB PE=3 SV=1	tr|M3X1Y4|M3X1Y4_FELCA (+1)	57 kDa	2	32	82	18
Valosin containing protein OS=Felis catus GN=VCP PE=3 SV=1	tr|M3VW05|M3VW05_FELCA	81 kDa	5	17	14	84
Ezrin OS=Felis catus GN=EZR PE=4 SV=1	tr|M3W8S0|M3W8S0_FELCA	71 kDa	18	20	55	22
Eukaryotic translation initiation factor 3 subunit A OS=Felis catus GN=EIF3A PE=3 SV=1	tr|M3WDN7|M3WDN7_FELCA	158 kDa	0	0	0	113
Tubulin alpha chain OS=Felis catus GN=TUBA1B PE=3 SV=1	tr|M3WFX6|M3WFX6_FELCA	50 kDa	13	27	35	36
Chaperonin containing TCP1 subunit 2 OS=Felis catus GN=CCT2 PE=3 SV=1	tr|M3VWY7|M3VWY7_FELCA	57 kDa	11	17	57	25
Transferrin OS=Felis catus GN=TF PE=3 SV=1	tr|M3WBQ5|M3WBQ5_FELCA	79 kDa	2	14	71	23
Uncharacterized protein OS=Felis catus GN=RPL4 PE=4 SV=1	tr|M3WGN8|M3WGN8_FELCA	47 kDa	9	44	21	35
Enolase 1 OS=Felis catus GN=ENO1 PE=3 SV=1	tr|M3WCP0|M3WCP0_FELCA	47 kDa	12	53	41	2
Vimentin OS=Felis catus GN=VIM PE=3 SV=1	tr|M3WJ26|M3WJ26_FELCA	54 kDa	24	49	11	16
Annexin OS=Felis catus GN=ANXA6 PE=3 SV=1	tr|M3WWE9|M3WWE9_FELCA	76 kDa	16	16	63	6
Uncharacterized protein OS=Felis catus GN=RPL7 PE=4 SV=1	tr|M3X9H4|M3X9H4_FELCA	30 kDa	50	21	15	8
Major vault protein OS=Felis catus GN=MVP PE=4 SV=1	tr|M3WK62|M3WK62_FELCA	99 kDa	0	0	0	91
Glyceraldehyde-3-phosphate dehydrogenase OS=Felis catus GN=GAPDH PE=3 SV=1	tr|A0A0A0MPZ5|A0A0A0MPZ5_FELCA	36 kDa	29	27	10	22
Chaperonin containing TCP1 subunit 8 OS=Felis catus GN=CCT8 PE=3 SV=1	tr|M3WNF9|M3WNF9_FELCA	60 kDa	3	21	47	16
Uncharacterized protein OS=Felis catus GN=LOC101094346 PE=4 SV=1	tr|M3WPJ9|M3WPJ9_FELCA	193 kDa	11	31	14	30
Ubiquitin like modifier activating enzyme 1 OS=Felis catus GN=UBA1 PE=3 SV=1	tr|M3VWK3|M3VWK3_FELCA	118 kDa	0	0	6	78
Dihydropyrimidinase like 3 OS=Felis catus GN=DPYSL3 PE=4 SV=1	tr|M3W984|M3W984_FELCA	62 kDa	6	11	52	15
Heat shock protein family A (Hsp70) member 5 OS=Felis catus GN=HSPA5 PE=3 SV=1	tr|M3WFT4|M3WFT4_FELCA	72 kDa	8	14	33	29
Calreticulin OS=Felis catus GN=CALR PE=3 SV=1	tr|M3VUU7|M3VUU7_FELCA	48 kDa	16	14	51	2
60S ribosomal protein L6 OS=Felis catus GN=RPL6 PE=3 SV=1	tr|M3W6M1|M3W6M1_FELCA	33 kDa	29	22	19	12
Adenosylhomocysteinase OS=Felis catus GN=AHCY PE=3 SV=1	tr|M3W7H0|M3W7H0_FELCA	48 kDa	9	56	12	4
Uncharacterized protein OS=Felis catus GN=CCT6A PE=3 SV=1	tr|M3WY56|M3WY56_FELCA	58 kDa	2	24	43	10
Adenylyl cyclase-associated protein OS=Felis catus GN=CAP1 PE=3 SV=1	tr|M3WH00|M3WH00_FELCA	51 kDa	0	7	55	17
Uncharacterized protein OS=Felis catus PE=4 SV=1	tr|M3X1A4|M3X1A4_FELCA	41 kDa	9	20	29	19
Catalase OS=Felis catus GN=CAT PE=3 SV=1	tr|M3VXR8|M3VXR8_FELCA	60 kDa	7	13	53	0
Leucine aminopeptidase 3 OS=Felis catus GN=LAP3 PE=3 SV=1	tr|M3WRM3|M3WRM3_FELCA	56 kDa	3	17	54	0
Rab GDP dissociation inhibitor OS=Felis catus GN=GDI2 PE=3 SV=1	tr|M3WHB4|M3WHB4_FELCA	48 kDa	4	54	15	0
Proteasome 26S subunit, non-ATPase 1 OS=Felis catus GN=PSMD1 PE=4 SV=1	tr|M3WCN2|M3WCN2_FELCA	106 kDa	0	0	0	72
Annexin OS=Felis catus GN=ANXA5 PE=3 SV=1	tr|M3W269|M3W269_FELCA	36 kDa	46	23	2	0
Aspartyl aminopeptidase OS=Felis catus GN=DNPEP PE=3 SV=1	tr|M3WER7|M3WER7_FELCA	52 kDa	0	27	33	11
Protein disulfide isomerase family A member 6 OS=Felis catus GN=PDIA6 PE=3 SV=1	tr|M3WB33|M3WB33_FELCA	49 kDa	3	34	24	9
Fatty acid synthase OS=Felis catus GN=FASN PE=4 SV=1	tr|M3WFK0|M3WFK0_FELCA	263 kDa	9	6	6	51
Steroid 17-alpha-hydroxylase/17,20 lyase OS=Felis catus GN=CYP17A1 PE=2 SV=1	sp|Q9GMC8|CP17A_FELCA (+1)	58 kDa	3	40	14	14
Fructose-bisphosphate aldolase OS=Felis catus PE=3 SV=1	tr|M3WK75|M3WK75_FELCA	75 kDa	5	56	9	0
Reticulocalbin 1 OS=Felis catus GN=RCN1 PE=4 SV=1	tr|M3XF37|M3XF37_FELCA	31 kDa	8	49	13	0
Chaperonin containing TCP1 subunit 5 OS=Felis catus GN=CCT5 PE=3 SV=1	tr|M3VZR8|M3VZR8_FELCA	60 kDa	0	7	47	16
Eukaryotic translation initiation factor 3 subunit C OS=Felis catus GN=LOC101090225 PE=3 SV=1	tr|M3WN96|M3WN96_FELCA	106 kDa	6	6	4	53
Uncharacterized protein OS=Felis catus GN=YWHAZ PE=3 SV=1	tr|M3XAX6|M3XAX6_FELCA	28 kDa	55	7	2	5
T-complex protein 1 subunit gamma OS=Felis catus GN=CCT3 PE=3 SV=1	tr|M3WFS1|M3WFS1_FELCA	64 kDa	0	11	35	23
Annexin OS=Felis catus GN=ANXA1 PE=3 SV=1	tr|M3WM96|M3WM96_FELCA	28 kDa	24	22	9	13
Ribosomal protein L8 OS=Felis catus GN=RPL8 PE=3 SV=1	tr|M3WRT2|M3WRT2_FELCA	28 kDa	19	16	20	13
Vinculin OS=Felis catus GN=VCL PE=4 SV=1	tr|M3WMV2|M3WMV2_FELCA (+1)	124 kDa	3	13	0	51
Methylenetetrahydrofolate dehydrogenase, cyclohydrolase and formyltetrahydrofolate synthetase 1 OS=Felis catus GN=MTHFD1 PE=3 SV=1	tr|M3W8F9|M3W8F9_FELCA	101 kDa	0	2	0	65
ADAM metallopeptidase domain 7 OS=Felis catus GN=ADAM7 PE=4 SV=1	tr|M3WI75|M3WI75_FELCA	91 kDa	0	2	3	61
LDL receptor related protein associated protein 1 OS=Felis catus GN=LRPAP1 PE=4 SV=1	tr|M3X1T7|M3X1T7_FELCA	34 kDa	9	51	6	0
40S ribosomal protein S4, X isoform OS=Felis catus GN=RPS4X PE=2 SV=2	sp|P62705|RS4X_FELCA	30 kDa	41	8	7	9
Filamin A OS=Felis catus GN=FLNA PE=4 SV=1	tr|M3WF12|M3WF12_FELCA	281 kDa	0	2	6	56
Chaperonin containing TCP1 subunit 7 OS=Felis catus GN=CCT7 PE=3 SV=1	tr|M3WJC5|M3WJC5_FELCA	59 kDa	0	14	32	19
Actinin alpha 4 OS=Felis catus GN=ACTN4 PE=4 SV=1	tr|M3X6F7|M3X6F7_FELCA	96 kDa	2	0	0	63
EH domain containing 2 OS=Felis catus GN=EHD2 PE=3 SV=1	tr|M3X0Y6|M3X0Y6_FELCA	61 kDa	13	27	20	7
Uncharacterized protein OS=Felis catus PE=3 SV=1	tr|M3X4M6|M3X4M6_FELCA	32 kDa	26	11	12	15
ATP-citrate synthase OS=Felis catus GN=ACLY PE=3 SV=1	tr|M3VXZ1|M3VXZ1_FELCA	122 kDa	0	8	0	56
Glucosidase II alpha subunit OS=Felis catus GN=GANAB PE=3 SV=1	tr|M3WAD1|M3WAD1_FELCA	109 kDa	0	2	0	59
L-lactate dehydrogenase OS=Felis catus GN=LDHB PE=3 SV=1	tr|M3WHA8|M3WHA8_FELCA	37 kDa	27	23	4	7
Dihydropyrimidinase like 2 OS=Felis catus GN=DPYSL2 PE=4 SV=1	tr|M3W3W8|M3W3W8_FELCA	62 kDa	6	9	45	20
Vesicle amine transport 1 OS=Felis catus GN=VAT1 PE=4 SV=1	tr|M3WIA9|M3WIA9_FELCA	43 kDa	0	33	24	3
Lectin, mannose binding 1 OS=Felis catus GN=LMAN1 PE=4 SV=1	tr|M3WT41|M3WT41_FELCA	58 kDa	0	2	24	35
Lymphocyte cytosolic protein 1 OS=Felis catus GN=LCP1 PE=4 SV=1	tr|M3WAY2|M3WAY2_FELCA	71 kDa	2	12	38	7
Glucose-6-phosphate isomerase OS=Felis catus GN=GPI PE=3 SV=1	tr|M3W3S8|M3W3S8_FELCA	63 kDa	5	6	47	0
Apolipoprotein H OS=Felis catus GN=APOH PE=4 SV=1	tr|M3WH75|M3WH75_FELCA	38 kDa	0	23	34	0
Ribosomal protein L3 OS=Felis catus GN=RPL3 PE=3 SV=1	tr|M3W4R9|M3W4R9_FELCA	48 kDa	7	25	11	16
Purine nucleoside phosphorylase OS=Felis catus GN=PNP PE=3 SV=1	tr|M3W6S5|M3W6S5_FELCA	32 kDa	47	6	3	0
Heat shock protein 90 alpha family class A member 1 OS=Felis catus GN=HSP90AA1 PE=3 SV=1	tr|M3VVG3|M3VVG3_FELCA	86 kDa	0	9	8	43
60S ribosomal protein L13 OS=Felis catus GN=RPL13 PE=3 SV=1	tr|M3W059|M3W059_FELCA	24 kDa	39	9	2	8
Ribosomal protein L15 OS=Felis catus GN=RPL15 PE=3 SV=1	tr|M3X6G6|M3X6G6_FELCA	24 kDa	27	14	7	9
Spectrin alpha, non-erythrocytic 1 OS=Felis catus GN=SPTAN1 PE=4 SV=1	tr|M3W4T6|M3W4T6_FELCA	285 kDa	0	0	0	55
Ectonucleotide pyrophosphatase/phosphodiesterase 3 OS=Felis catus GN=ENPP3 PE=4 SV=1	tr|M3WK44|M3WK44_FELCA	100 kDa	0	0	0	56
Annexin OS=Felis catus GN=ANXA11 PE=3 SV=1	tr|M3XFZ3|M3XFZ3_FELCA	54 kDa	8	16	36	5
Uncharacterized protein OS=Felis catus GN=RPL7A PE=4 SV=1	tr|M3W4S2|M3W4S2_FELCA	30 kDa	45	7	0	2
Gelsolin OS=Felis catus GN=GSN PE=4 SV=1	tr|M3VZP6|M3VZP6_FELCA	82 kDa	0	26	4	24
GC, vitamin D binding protein OS=Felis catus GN=GC PE=3 SV=1	tr|M3W2Z1|M3W2Z1_FELCA	53 kDa	0	41	13	0
40S ribosomal protein S8 OS=Felis catus GN=RPS8 PE=3 SV=1	tr|M3XA78|M3XA78_FELCA	24 kDa	27	11	8	7
Talin 1 OS=Felis catus GN=TLN1 PE=4 SV=1	tr|M3WHI4|M3WHI4_FELCA	270 kDa	6	13	0	33
T-complex 1 OS=Felis catus GN=TCP1 PE=3 SV=1	tr|M3VZ89|M3VZ89_FELCA	61 kDa	0	6	35	12
Fibrinogen beta chain OS=Felis catus GN=FGB PE=4 SV=1	tr|M3WII3|M3WII3_FELCA	56 kDa	0	11	32	9
Actin, alpha, cardiac muscle 1 OS=Felis catus GN=ACTC1 PE=3 SV=1	tr|M3WK07|M3WK07_FELCA	42 kDa	30	136	48	42
Nucleolin OS=Felis catus GN=NCL PE=4 SV=1	tr|M3WVY3|M3WVY3_FELCA	78 kDa	0	21	17	15
Serpin family H member 1 OS=Felis catus GN=SERPINH1 PE=3 SV=1	tr|M3WG24|M3WG24_FELCA	46 kDa	2	43	6	0
B-cell receptor-associated protein 31 OS=Felis catus GN=BCAP31 PE=4 SV=1	tr|M3W1G2|M3W1G2_FELCA	28 kDa	51	0	0	0
Eukaryotic translation initiation factor 3 subunit B OS=Felis catus GN=EIF3B PE=3 SV=1	tr|M3W3Z6|M3W3Z6_FELCA	94 kDa	0	0	0	51
Elongation factor 1-alpha 1 OS=Felis catus GN=EEF1A1 PE=2 SV=1	sp|Q66RN5|EF1A1_FELCA	50 kDa	10	16	12	13
Transketolase OS=Felis catus GN=TKT PE=4 SV=1	tr|M3W162|M3W162_FELCA (+1)	68 kDa	5	10	32	4
AP complex subunit beta OS=Felis catus GN=AP1B1 PE=3 SV=1	tr|M3WY66|M3WY66_FELCA	105 kDa	5	2	7	37
Haptoglobin OS=Felis catus GN=HP PE=3 SV=1	tr|M3W4S3|M3W4S3_FELCA	38 kDa	0	30	21	0
Phosphoglycerate kinase OS=Felis catus GN=PGK1 PE=3 SV=1	tr|M3WIF4|M3WIF4_FELCA	45 kDa	2	49	0	0
Eukaryotic translation elongation factor 1 gamma OS=Felis catus GN=EEF1G PE=4 SV=1	tr|M3WAC5|M3WAC5_FELCA	56 kDa	6	26	8	10
Adaptor related protein complex 2 alpha 1 subunit OS=Felis catus GN=AP2A1 PE=4 SV=1	tr|M3W262|M3W262_FELCA	108 kDa	0	0	11	39
Inter-alpha-trypsin inhibitor heavy chain family member 4 OS=Felis catus GN=ITIH4 PE=4 SV=1	tr|M3WN61|M3WN61_FELCA	106 kDa	4	3	9	33
Bone marrow stromal cell antigen 1 OS=Felis catus GN=BST1 PE=4 SV=1	tr|M3WEJ1|M3WEJ1_FELCA	30 kDa	2	33	14	0
Calnexin OS=Felis catus GN=CANX PE=3 SV=1	tr|M3XBV5|M3XBV5_FELCA	68 kDa	4	11	5	28
Erythrocyte membrane protein band 4.1 like 2 OS=Felis catus GN=EPB41L2 PE=4 SV=1	tr|M3WB54|M3WB54_FELCA	109 kDa	2	17	9	20
Prostaglandin F2 receptor inhibitor OS=Felis catus GN=PTGFRN PE=4 SV=1	tr|M3VXN4|M3VXN4_FELCA	98 kDa	0	0	0	46
Alpha-1,4 glucan phosphorylase OS=Felis catus GN=PYGB PE=3 SV=1	tr|M3W9K0|M3W9K0_FELCA	97 kDa	0	0	0	46
Proteasome 26S subunit, non-ATPase 11 OS=Felis catus GN=PSMD11 PE=4 SV=1	tr|M3VXT7|M3VXT7_FELCA	47 kDa	0	43	5	0
Uncharacterized protein OS=Felis catus GN=HSPA8 PE=3 SV=1	tr|M3VW17|M3VW17_FELCA	71 kDa	7	10	27	7
Endoplasmic reticulum protein 44 OS=Felis catus GN=ERP44 PE=4 SV=1	tr|M3WMZ2|M3WMZ2_FELCA	47 kDa	0	31	10	5
Mannosidase alpha class 2C member 1 OS=Felis catus GN=MAN2C1 PE=4 SV=1	tr|M3WEZ3|M3WEZ3_FELCA	115 kDa	0	0	0	46
Ribosomal protein S9 OS=Felis catus GN=RPS9 PE=3 SV=1	tr|M3WJZ7|M3WJZ7_FELCA	23 kDa	15	14	6	11
Myosin IC OS=Felis catus GN=MYO1C PE=3 SV=1	tr|M3W5M2|M3W5M2_FELCA	122 kDa	0	0	0	46
Spectrin beta chain OS=Felis catus GN=SPTBN1 PE=3 SV=1	tr|M3WDK0|M3WDK0_FELCA	273 kDa	5	0	3	35
Protein phosphatase 2 scaffold subunit Aalpha OS=Felis catus GN=PPP2R1A PE=4 SV=1	tr|M3W170|M3W170_FELCA	65 kDa	0	0	42	2
ARP1 actin-related protein 1 homolog A, centractin alpha OS=Felis catus GN=ACTR1A PE=3 SV=1	tr|M3VWA6|M3VWA6_FELCA	43 kDa	0	43	5	0
Uncharacterized protein OS=Felis catus GN=PLG PE=3 SV=1	tr|M3X3T9|M3X3T9_FELCA	92 kDa	0	0	0	44
Uncharacterized protein OS=Felis catus PE=4 SV=1	tr|M3WF14|M3WF14_FELCA	26 kDa	8	11	8	17
Ribosomal protein L14 OS=Felis catus GN=RPL14 PE=4 SV=1	tr|M3WN06|M3WN06_FELCA	23 kDa	19	7	9	11
Aldehyde dehydrogenase 9 family member A1 OS=Felis catus GN=ALDH9A1 PE=3 SV=1	tr|M3W1Z4|M3W1Z4_FELCA	56 kDa	0	19	19	6
Collagen type XIV alpha 1 chain OS=Felis catus GN=COL14A1 PE=4 SV=1	tr|M3VWP6|M3VWP6_FELCA	193 kDa	0	0	4	38
Glutathione S-transferase OS=Felis catus GN=GSTM3 PE=3 SV=1	tr|M3WMX0|M3WMX0_FELCA	27 kDa	37	2	2	2
Annexin OS=Felis catus GN=ANXA4 PE=3 SV=1	tr|M3WIJ2|M3WIJ2_FELCA	36 kDa	36	7	0	0
Coatomer subunit beta OS=Felis catus GN=COPB1 PE=4 SV=1	tr|M3WF04|M3WF04_FELCA	107 kDa	0	0	0	44
Heterogeneous nuclear ribonucleoprotein H1 OS=Felis catus GN=HNRNPH1 PE=4 SV=1	tr|M3VW73|M3VW73_FELCA	51 kDa	10	12	9	11
Tyrosine 3-monooxygenase/tryptophan 5-monooxygenase activation protein theta OS=Felis catus GN=YWHAQ PE=3 SV=1	tr|M3W8I2|M3W8I2_FELCA	28 kDa	48	10	5	8
Eukaryotic translation elongation factor 2 OS=Felis catus GN=EEF2 PE=4 SV=1	tr|M3VVM1|M3VVM1_FELCA	95 kDa	2	0	10	31
Serine and arginine rich splicing factor 1 OS=Felis catus GN=SRSF1 PE=4 SV=1	tr|M3VY56|M3VY56_FELCA	28 kDa	36	5	0	0
Poly [ADP-ribose] polymerase OS=Felis catus GN=PARP1 PE=4 SV=1	tr|M3W4P6|M3W4P6_FELCA	112 kDa	0	0	5	34
Ribosomal protein OS=Felis catus GN=RPL10A PE=3 SV=1	tr|M3WHU6|M3WHU6_FELCA	25 kDa	41	0	0	0
Aminopeptidase N OS=Felis catus GN=ANPEP PE=1 SV=3	sp|P79171|AMPN_FELCA	109 kDa	0	0	0	41
Actinin alpha 1 OS=Felis catus GN=ACTN1 PE=4 SV=1	tr|M3VVH8|M3VVH8_FELCA	100 kDa	0	0	0	60
Heat shock protein family A (Hsp70) member 4 like OS=Felis catus GN=HSPA4L PE=3 SV=1	tr|M3W9Y3|M3W9Y3_FELCA	98 kDa	0	0	0	42
40S ribosomal protein S3a (Fragment) OS=Felis catus GN=RPS3A PE=2 SV=1	sp|P61246|RS3A_FELCA (+1)	30 kDa	9	10	9	13
Alkaline phosphatase OS=Felis catus GN=ALPL PE=3 SV=1	tr|A0A0A0MPX9|A0A0A0MPX9_FELCA	56 kDa	8	9	7	16
Uncharacterized protein OS=Felis catus GN=KRT8 PE=3 SV=1	tr|M3VUH2|M3VUH2_FELCA	56 kDa	3	29	6	4
Uncharacterized protein OS=Felis catus PE=4 SV=1	tr|M3WF21|M3WF21_FELCA	30 kDa	0	6	23	12
EH domain containing 1 OS=Felis catus GN=EHD1 PE=3 SV=1	tr|M3X1U0|M3X1U0_FELCA	61 kDa	0	13	27	0
Eukaryotic translation initiation factor 4A2 OS=Felis catus GN=EIF4A2 PE=3 SV=1	tr|M3WJN3|M3WJN3_FELCA	46 kDa	0	40	0	0
WASH complex subunit 5 OS=Felis catus GN=WASHC5 PE=4 SV=1	tr|M3W2M5|M3W2M5_FELCA	135 kDa	0	0	0	41
Serum albumin OS=Felis catus GN=ALB PE=3 SV=1	tr|M3WFW6|M3WFW6_FELCA	69 kDa	0	91	257	59
Coatomer subunit alpha OS=Felis catus GN=COPA PE=4 SV=1	tr|M3W182|M3W182_FELCA	139 kDa	0	12	14	14
Creatine kinase B OS=Felis catus GN=CKB PE=3 SV=1	tr|M3W8P6|M3W8P6_FELCA (+1)	43 kDa	0	33	6	0
Eukaryotic translation initiation factor 3 subunit E OS=Felis catus GN=EIF3E PE=3 SV=1	tr|M3W0R4|M3W0R4_FELCA	52 kDa	0	35	5	0
Alpha-2-macroglobulin OS=Felis catus GN=A2M PE=4 SV=1	tr|M3WMA9|M3WMA9_FELCA	164 kDa	0	0	4	36
Endoplasmic reticulum resident protein 29 OS=Felis catus GN=ERP29 PE=4 SV=1	tr|M3X8E4|M3X8E4_FELCA	29 kDa	39	0	0	0
NCK associated protein 1 OS=Felis catus GN=NCKAP1 PE=4 SV=1	tr|M3WPK0|M3WPK0_FELCA	126 kDa	0	0	0	40
T-complex protein 1 subunit delta OS=Felis catus GN=CCT4 PE=3 SV=1	tr|M3WRA1|M3WRA1_FELCA	46 kDa	5	9	18	12
Uncharacterized protein OS=Felis catus GN=KRT18 PE=3 SV=1	tr|M3VUH3|M3VUH3_FELCA	50 kDa	2	33	3	0
Coatomer subunit delta OS=Felis catus GN=ARCN1 PE=3 SV=1	tr|M3WFS6|M3WFS6_FELCA	57 kDa	11	4	24	0
Proteasome 26S subunit, non-ATPase 2 OS=Felis catus GN=PSMD2 PE=4 SV=1	tr|M3W8D9|M3W8D9_FELCA	100 kDa	0	2	0	36
Galectin-3-binding protein OS=Felis catus GN=LGALS3BP PE=4 SV=1	tr|M3XG56|M3XG56_FELCA	63 kDa	3	10	10	14
Dolichyl-diphosphooligosaccharide--protein glycosyltransferase 48 kDa subunit OS=Felis catus GN=DDOST PE=3 SV=1	tr|M3VVE9|M3VVE9_FELCA	49 kDa	5	26	7	0
Serpin family F member 1 OS=Felis catus GN=SERPINF1 PE=3 SV=1	tr|M3W5N1|M3W5N1_FELCA	46 kDa	6	26	6	0
Copine 3 OS=Felis catus GN=CPNE3 PE=4 SV=1	tr|M3X7N3|M3X7N3_FELCA	60 kDa	0	4	27	7
RuvB-like helicase OS=Felis catus GN=RUVBL1 PE=3 SV=1	tr|M3WAA5|M3WAA5_FELCA	50 kDa	0	7	29	2
Proteasome 26S subunit, non-ATPase 6 OS=Felis catus GN=PSMD6 PE=4 SV=1	tr|M3VV10|M3VV10_FELCA	46 kDa	0	36	2	0
Staphylococcal nuclease and tudor domain containing 1 OS=Felis catus GN=SND1 PE=4 SV=1	tr|M3W9B3|M3W9B3_FELCA	102 kDa	0	0	0	38
Proteasome subunit alpha type OS=Felis catus GN=PSMA6 PE=3 SV=1	tr|M3WV20|M3WV20_FELCA	27 kDa	38	0	0	0
60S ribosomal protein L18a OS=Felis catus GN=RPL18A PE=3 SV=1	tr|M3W7V0|M3W7V0_FELCA	21 kDa	8	12	7	10
Uncharacterized protein OS=Felis catus GN=LOC105261103 PE=4 SV=1	tr|M3W3D2|M3W3D2_FELCA	172 kDa	3	11	4	19
Proteasome 26S subunit, ATPase 5 OS=Felis catus GN=PSMC5 PE=3 SV=1	tr|M3W0G3|M3W0G3_FELCA	47 kDa	0	21	3	12
Proteasome 26S subunit, non-ATPase 3 OS=Felis catus GN=PSMD3 PE=4 SV=1	tr|M3WLR0|M3WLR0_FELCA	61 kDa	0	2	17	18
Trypsin - Sus scrofa (Pig).	IPI:CON_Trypsin|SWISS-PROT:P00761|TRYP_PIG	24 kDa	12	7	8	9
40S ribosomal protein S6 OS=Felis catus GN=RPS6 PE=3 SV=1	tr|M3VYQ2|M3VYQ2_FELCA	28 kDa	17	7	7	5
Peroxiredoxin 1 OS=Felis catus GN=PRDX1 PE=4 SV=1	tr|M3XBK1|M3XBK1_FELCA	22 kDa	12	11	3	10
Annexin OS=Felis catus GN=ANXA7 PE=3 SV=1	tr|M3W9B7|M3W9B7_FELCA	53 kDa	10	25	3	0
UDP-glucose pyrophosphorylase 2 OS=Felis catus GN=UGP2 PE=4 SV=1	tr|M3WNV6|M3WNV6_FELCA	59 kDa	0	9	26	0
tRNA-splicing ligase RtcB homolog OS=Felis catus GN=RTCB PE=3 SV=1	tr|M3XE87|M3XE87_FELCA	55 kDa	0	6	29	0
Argininosuccinate synthase 1 OS=Felis catus GN=ASS1 PE=3 SV=1	tr|M3WZN9|M3WZN9_FELCA	46 kDa	0	34	0	0
Ectonucleotide pyrophosphatase/phosphodiesterase 6 OS=Felis catus GN=ENPP6 PE=4 SV=1	tr|M3VWW1|M3VWW1_FELCA	50 kDa	0	0	11	25
ARP3 actin related protein 3 homolog OS=Felis catus GN=ACTR3 PE=3 SV=1	tr|M3WJ03|M3WJ03_FELCA	47 kDa	0	29	7	0
6-phosphogluconate dehydrogenase, decarboxylating OS=Felis catus GN=PGD PE=3 SV=1	tr|M3WKZ2|M3WKZ2_FELCA	53 kDa	0	34	2	0
Isocitrate dehydrogenase [NADP] OS=Felis catus GN=IDH1 PE=3 SV=1	tr|M3W1B8|M3W1B8_FELCA	47 kDa	0	36	0	0
Ribosomal protein S27a OS=Felis catus GN=RPS27A PE=4 SV=1	tr|M3WWF6|M3WWF6_FELCA	18 kDa	7	10	7	11
G protein subunit alpha i2 OS=Felis catus GN=GNAI2 PE=4 SV=1	tr|M3W6X3|M3W6X3_FELCA	40 kDa	5	17	10	3
Decorin OS=Felis catus GN=DCN PE=4 SV=1	tr|M3X0W2|M3X0W2_FELCA	40 kDa	0	2	8	25
Dopa decarboxylase OS=Felis catus GN=DDC PE=3 SV=1	tr|M3WGL5|M3WGL5_FELCA	54 kDa	0	21	14	0
Myosin heavy chain 11 OS=Felis catus GN=MYH11 PE=3 SV=1	tr|M3WIG9|M3WIG9_FELCA (+1)	228 kDa	0	0	0	34
Adipocyte plasma membrane associated protein OS=Felis catus GN=APMAP PE=4 SV=1	tr|M3X681|M3X681_FELCA	46 kDa	0	34	0	0
Uncharacterized protein OS=Felis catus GN=PAICS PE=3 SV=1	tr|M3XCP5|M3XCP5_FELCA	48 kDa	0	33	0	0
Angiotensin-converting enzyme OS=Felis catus PE=3 SV=1	tr|M3VXV0|M3VXV0_FELCA	142 kDa	0	0	0	34
Hexokinase 1 OS=Felis catus GN=HK1 PE=3 SV=1	tr|M3W346|M3W346_FELCA	103 kDa	0	0	0	35
Apolipoprotein A1 OS=Felis catus GN=APOA1 PE=3 SV=1	tr|M3WPG6|M3WPG6_FELCA	31 kDa	35	0	0	0
Ribosomal protein S16 OS=Felis catus GN=RPS16 PE=3 SV=1	tr|M3WDU7|M3WDU7_FELCA	18 kDa	11	9	4	10
G protein subunit beta 2 OS=Felis catus GN=GNB2 PE=4 SV=1	tr|M3X5T9|M3X5T9_FELCA	37 kDa	14	11	5	4
Septin 7 OS=Felis catus GN=SEPT7 PE=3 SV=1	tr|M3X872|M3X872_FELCA	45 kDa	0	25	5	4
Heat shock protein 27 kDa beta-1 OS=Felis catus GN=HSPB1 PE=3 SV=1	tr|M3WWP2|M3WWP2_FELCA	23 kDa	28	4	2	0
Serpin family C member 1 OS=Felis catus GN=SERPINC1 PE=3 SV=1	tr|M3WLL8|M3WLL8_FELCA	52 kDa	0	3	29	2
Tyrosine 3-monooxygenase/tryptophan 5-monooxygenase activation protein epsilon OS=Felis catus GN=YWHAE PE=3 SV=1	tr|M3WEZ7|M3WEZ7_FELCA	27 kDa	39	0	0	0
5'-nucleotidase ecto OS=Felis catus GN=NT5E PE=3 SV=1	tr|M3W6Q5|M3W6Q5_FELCA	53 kDa	3	6	20	4
Purine rich element binding protein A OS=Felis catus GN=PURA PE=4 SV=1	tr|M3VWB8|M3VWB8_FELCA	34 kDa	0	22	5	6
Ceruloplasmin OS=Felis catus GN=CP PE=3 SV=1	tr|M3VZY7|M3VZY7_FELCA	125 kDa	2	0	0	31
Proteasome subunit alpha type OS=Felis catus GN=PSMA4 PE=3 SV=1	tr|M3VXJ6|M3VXJ6_FELCA	29 kDa	33	0	0	0
Proteasome subunit beta type OS=Felis catus GN=PSMB7 PE=3 SV=1	tr|M3WKX9|M3WKX9_FELCA	30 kDa	33	0	0	0
Triosephosphate isomerase OS=Felis catus GN=TPI1 PE=3 SV=1	tr|M3X9A1|M3X9A1_FELCA	30 kDa	33	0	0	0
Serine and arginine rich splicing factor 6 OS=Felis catus GN=SRSF6 PE=4 SV=1	tr|M3X4Y6|M3X4Y6_FELCA	39 kDa	11	13	5	3
Ribosomal protein S11 OS=Felis catus GN=RPS11 PE=3 SV=1	tr|M3WAZ1|M3WAZ1_FELCA	18 kDa	6	9	5	15
Hemopexin OS=Felis catus GN=HPX PE=4 SV=1	tr|M3W2J4|M3W2J4_FELCA	52 kDa	0	4	27	0
Sushi domain containing 2 OS=Felis catus GN=SUSD2 PE=4 SV=1	tr|M3WBD8|M3WBD8_FELCA	90 kDa	0	7	23	0
Ribosomal protein L5 OS=Felis catus GN=RPL5 PE=3 SV=1	tr|M3WUK3|M3WUK3_FELCA	34 kDa	24	7	0	0
Clathrin heavy chain OS=Felis catus GN=CLTC PE=3 SV=1	tr|M3WZ57|M3WZ57_FELCA (+1)	187 kDa	0	0	0	29
Selenium binding protein 1 OS=Felis catus GN=SELENBP1 PE=4 SV=1	tr|M3VXE7|M3VXE7_FELCA	53 kDa	0	6	26	0
Protein kinase cAMP-activated catalytic subunit alpha OS=Felis catus GN=PRKACA PE=3 SV=1	tr|M3WWL5|M3WWL5_FELCA	40 kDa	0	31	0	0
Integrin beta-1 OS=Felis catus GN=ITGB1 PE=2 SV=1	sp|P53713|ITB1_FELCA	88 kDa	0	0	0	32
Sodium/potassium-transporting ATPase subunit alpha OS=Felis catus GN=ATP1A1 PE=3 SV=1	tr|M3WIR8|M3WIR8_FELCA	111 kDa	0	0	0	32
Dynactin subunit 2 OS=Felis catus GN=DCTN2 PE=4 SV=1	tr|M3VXV6|M3VXV6_FELCA	45 kDa	0	8	6	16
Trifunctional purine biosynthetic protein adenosine-3 OS=Felis catus GN=GART PE=3 SV=1	tr|M3WB84|M3WB84_FELCA	108 kDa	0	3	0	27
Four and a half LIM domains 1 OS=Felis catus GN=FHL1 PE=4 SV=1	tr|M3XCC0|M3XCC0_FELCA	32 kDa	28	3	0	0
Chromosome 14 open reading frame 166 OS=Felis catus GN=C14orf166 PE=4 SV=1	tr|M3VYX1|M3VYX1_FELCA	28 kDa	30	0	0	0
Peroxiredoxin 6 OS=Felis catus GN=PRDX6 PE=4 SV=1	tr|M3X2Q5|M3X2Q5_FELCA	25 kDa	31	0	0	0
Proteasome subunit alpha type OS=Felis catus GN=PSMA3 PE=3 SV=1	tr|M3X983|M3X983_FELCA	29 kDa	31	0	0	0
Ribosomal protein L28 OS=Felis catus GN=RPL28 PE=4 SV=1	tr|M3W4G0|M3W4G0_FELCA	16 kDa	10	10	5	5
Proteasome 26S subunit, ATPase 4 OS=Felis catus GN=PSMC4 PE=3 SV=1	tr|M3VVV5|M3VVV5_FELCA	47 kDa	3	13	0	16
Eukaryotic translation initiation factor 3 subunit L OS=Felis catus GN=EIF3L PE=3 SV=1	tr|M3X955|M3X955_FELCA	71 kDa	0	0	28	0
Alanyl-tRNA synthetase OS=Felis catus GN=AARS PE=3 SV=1	tr|M3WBJ0|M3WBJ0_FELCA (+1)	107 kDa	0	0	0	29
Cullin associated and neddylation dissociated 1 OS=Felis catus GN=CAND1 PE=4 SV=1	tr|M3X6G0|M3X6G0_FELCA	136 kDa	0	0	0	29
Elongation factor Tu GTP binding domain containing 2 OS=Felis catus GN=EFTUD2 PE=4 SV=1	tr|M3W441|M3W441_FELCA	109 kDa	0	0	0	30
DnaJ heat shock protein family (Hsp40) member C3 OS=Felis catus GN=DNAJC3 PE=4 SV=1	tr|M3WSH1|M3WSH1_FELCA	55 kDa	0	0	30	0
USO1 vesicle transport factor OS=Felis catus GN=USO1 PE=4 SV=1	tr|M3X9J6|M3X9J6_FELCA	107 kDa	0	0	0	29
Uncharacterized protein OS=Felis catus GN=RPL27A PE=3 SV=1	tr|M3W9J7|M3W9J7_FELCA	17 kDa	7	8	5	9
Vanin 1 OS=Felis catus GN=VNN1 PE=4 SV=1	tr|M3VWI5|M3VWI5_FELCA	57 kDa	2	5	20	2
Uncharacterized protein OS=Felis catus PE=4 SV=1	tr|M3X9P4|M3X9P4_FELCA	47 kDa	0	16	22	17
Uncharacterized protein OS=Felis catus PE=4 SV=1	tr|M3X833|M3X833_FELCA	37 kDa	2	0	11	14
Caveolae associated protein 1 OS=Felis catus GN=CAVIN1 PE=4 SV=1	tr|M3X6G1|M3X6G1_FELCA	43 kDa	7	5	16	0
Carnosine dipeptidase 2 OS=Felis catus GN=CNDP2 PE=4 SV=1	tr|M3W9A2|M3W9A2_FELCA	53 kDa	0	9	18	2
Glutamyl-prolyl-tRNA synthetase OS=Felis catus GN=EPRS PE=3 SV=1	tr|M3VYT1|M3VYT1_FELCA	171 kDa	3	0	5	21
Aldehyde dehydrogenase OS=Felis catus GN=ALDH3A2 PE=3 SV=1	tr|M3WTG1|M3WTG1_FELCA	57 kDa	0	6	23	0
Beta-1,4-galactosyltransferase 4 OS=Felis catus GN=B4GALT4 PE=4 SV=1	tr|M3W8S5|M3W8S5_FELCA	40 kDa	0	27	0	0
Golgi glycoprotein 1 OS=Felis catus GN=GLG1 PE=4 SV=1	tr|M3VZ10|M3VZ10_FELCA	99 kDa	0	0	0	29
Uncharacterized protein OS=Felis catus PE=4 SV=1	tr|M3W898|M3W898_FELCA	73 kDa	0	0	0	29
Heat shock protein family A (Hsp70) member 4 OS=Felis catus GN=HSPA4 PE=3 SV=1	tr|M3WGX4|M3WGX4_FELCA	94 kDa	0	0	0	33
Phosphoglycerate mutase OS=Felis catus GN=PGAM4 PE=3 SV=1	tr|M3WKJ9|M3WKJ9_FELCA	29 kDa	29	0	0	0
Carbonic anhydrase 3 OS=Felis catus GN=CA3 PE=4 SV=1	tr|M3WS40|M3WS40_FELCA	30 kDa	29	0	0	0
Dimethylarginine dimethylaminohydrolase 2 OS=Felis catus GN=DDAH2 PE=4 SV=1	tr|M3XC02|M3XC02_FELCA	30 kDa	29	0	0	0
Calcyphosine OS=Felis catus GN=CAPS PE=4 SV=1	tr|M3WRR4|M3WRR4_FELCA	21 kDa	12	3	4	9
RuvB-like helicase OS=Felis catus GN=RUVBL2 PE=3 SV=1	tr|M3W067|M3W067_FELCA	46 kDa	4	16	8	0
Nucleobindin 2 OS=Felis catus GN=NUCB2 PE=4 SV=1	tr|M3W7H2|M3W7H2_FELCA	55 kDa	7	11	11	0
Inositol-3-phosphate synthase 1 OS=Felis catus GN=ISYNA1 PE=4 SV=1	tr|M3WC06|M3WC06_FELCA	61 kDa	0	2	15	11
2',3'-cyclic-nucleotide 3'-phosphodiesterase OS=Felis catus GN=CNP PE=3 SV=1	tr|M3WWG3|M3WWG3_FELCA	47 kDa	2	23	0	3
Beta-hexosaminidase subunit beta OS=Felis catus GN=HEXB PE=2 SV=2	sp|P49614|HEXB_FELCA	60 kDa	0	3	24	0
Aconitate hydratase OS=Felis catus GN=ACO1 PE=3 SV=1	tr|M3VWD8|M3VWD8_FELCA	98 kDa	0	0	0	28
Epoxide hydrolase OS=Felis catus GN=EPHX1 PE=3 SV=1	tr|M3W6U2|M3W6U2_FELCA	52 kDa	0	28	0	0
ATP synthase subunit beta OS=Felis catus GN=ATP5B PE=3 SV=1	tr|M3WG78|M3WG78_FELCA	56 kDa	2	18	7	0
Golgi reassembly stacking protein 2 OS=Felis catus GN=GORASP2 PE=4 SV=1	tr|M3WQ88|M3WQ88_FELCA	47 kDa	10	0	16	0
Proteasome 26S subunit, non-ATPase 12 OS=Felis catus GN=PSMD12 PE=4 SV=1	tr|M3X366|M3X366_FELCA	53 kDa	0	15	12	0
Proteasome subunit alpha type OS=Felis catus GN=PSMA1 PE=3 SV=1	tr|M3WF05|M3WF05_FELCA	29 kDa	24	3	0	0
Dipeptidyl peptidase 4 OS=Felis catus GN=DPP4 PE=2 SV=1	sp|Q9N2I7|DPP4_FELCA (+1)	88 kDa	0	0	0	27
Proteasome endopeptidase complex OS=Felis catus PE=3 SV=1	tr|M3W006|M3W006_FELCA	24 kDa	29	0	0	0
Uncharacterized protein OS=Felis catus PE=3 SV=1	tr|M3W8B6|M3W8B6_FELCA	25 kDa	27	0	0	0
Aminopeptidase OS=Felis catus GN=NPEPPS PE=3 SV=1	tr|M3X5Z4|M3X5Z4_FELCA	94 kDa	0	0	0	27
D-3-phosphoglycerate dehydrogenase OS=Felis catus GN=PHGDH PE=3 SV=1	tr|M3WF60|M3WF60_FELCA	57 kDa	2	6	10	8
Uncharacterized protein OS=Felis catus GN=RPS3 PE=3 SV=1	tr|M3WG22|M3WG22_FELCA	27 kDa	12	3	3	8
Uncharacterized protein OS=Felis catus GN=RPL18 PE=4 SV=1	tr|M3W9Y8|M3W9Y8_FELCA	22 kDa	9	7	8	2
Clusterin OS=Felis catus GN=CLU PE=3 SV=1	tr|M3WKP2|M3WKP2_FELCA	52 kDa	0	0	16	10
Proteasome subunit alpha type OS=Felis catus GN=PSMA5 PE=3 SV=1	tr|M3WR82|M3WR82_FELCA	26 kDa	25	0	0	0
Adenosine kinase OS=Felis catus GN=ADK PE=4 SV=1	tr|M3WMV3|M3WMV3_FELCA	41 kDa	0	25	0	0
Prominin 1 OS=Felis catus GN=PROM1 PE=4 SV=1	tr|M3WLW5|M3WLW5_FELCA	86 kDa	0	0	0	26
ATP synthase subunit alpha OS=Felis catus GN=ATP5A1 PE=3 SV=1	tr|M3WZB0|M3WZB0_FELCA	60 kDa	0	10	13	0
Ribosomal protein S5 OS=Felis catus GN=RPS5 PE=3 SV=1	tr|M3X5Q3|M3X5Q3_FELCA	23 kDa	17	2	0	6
Mucin 15, cell surface associated OS=Felis catus GN=MUC15 PE=4 SV=1	tr|M3WJI9|M3WJI9_FELCA	36 kDa	0	0	2	23
Tyrosylprotein sulfotransferase 2 OS=Felis catus GN=TPST2 PE=4 SV=1	tr|M3WDS7|M3WDS7_FELCA	38 kDa	0	0	0	24
Isocitrate dehydrogenase [NADP] OS=Felis catus GN=IDH2 PE=3 SV=1	tr|M3X0N0|M3X0N0_FELCA	46 kDa	0	24	0	0
Programmed cell death 6 interacting protein OS=Felis catus GN=PDCD6IP PE=4 SV=1	tr|M3XG34|M3XG34_FELCA	89 kDa	0	0	0	24
Rho GDP dissociation inhibitor alpha OS=Felis catus GN=ARHGDIA PE=4 SV=1	tr|M3WQS4|M3WQS4_FELCA	23 kDa	25	0	0	0
Cytochrome P450 family 20 subfamily A member 1 OS=Felis catus GN=CYP20A1 PE=4 SV=1	tr|M3X215|M3X215_FELCA	53 kDa	0	25	0	0
2-phosphoxylose phosphatase 1 OS=Felis catus GN=PXYLP1 PE=3 SV=1	tr|M3X2X4|M3X2X4_FELCA	56 kDa	0	0	25	0
Transglutaminase 2 OS=Felis catus GN=TGM2 PE=4 SV=1	tr|M3W2W5|M3W2W5_FELCA	77 kDa	0	6	4	14
Protein disulfide-isomerase A4 OS=Felis catus GN=PDIA4 PE=3 SV=1	tr|M3W9X1|M3W9X1_FELCA	73 kDa	0	4	12	8
Uncharacterized protein OS=Felis catus GN=GGT1 PE=4 SV=1	tr|M3VWS9|M3VWS9_FELCA	61 kDa	0	6	17	0
CD63 antigen OS=Felis catus GN=CD63 PE=2 SV=3	sp|Q76B49|CD63_FELCA (+1)	26 kDa	0	14	9	0
DnaJ homolog subfamily C member 10 OS=Felis catus GN=DNAJC10 PE=4 SV=1	tr|M3WWG7|M3WWG7_FELCA	91 kDa	0	0	4	19
Polyadenylate-binding protein OS=Felis catus GN=PABPC1 PE=3 SV=1	tr|M3VXF8|M3VXF8_FELCA	63 kDa	0	20	4	0
Fascin OS=Felis catus GN=FSCN1 PE=3 SV=1	tr|M3WAN2|M3WAN2_FELCA	49 kDa	0	5	19	0
Uncharacterized protein OS=Felis catus GN=EPCAM PE=4 SV=1	tr|M3WIV4|M3WIV4_FELCA	35 kDa	0	19	5	0
Uncharacterized protein OS=Felis catus PE=4 SV=1	tr|M3WAH7|M3WAH7_FELCA	469 kDa	0	0	0	23
Uncharacterized protein OS=Felis catus GN=HMGB1 PE=4 SV=1	tr|M3VUA1|M3VUA1_FELCA	25 kDa	24	0	0	0
Splicing factor 3b subunit 1 OS=Felis catus GN=SF3B1 PE=4 SV=1	tr|M3W3C6|M3W3C6_FELCA	146 kDa	0	0	0	24
Polypyrimidine tract binding protein 1 OS=Felis catus GN=PTBP1 PE=4 SV=1	tr|M3VW82|M3VW82_FELCA	56 kDa	4	3	15	0
Septin 2 OS=Felis catus GN=SEPT2 PE=3 SV=1	tr|M3VZ57|M3VZ57_FELCA	41 kDa	0	21	0	0
Sodium/potassium-transporting ATPase subunit beta OS=Felis catus GN=ATP1B1 PE=3 SV=1	tr|M3WB86|M3WB86_FELCA	35 kDa	0	12	11	0
Thioredoxin domain containing 5 OS=Felis catus GN=TXNDC5 PE=3 SV=1	tr|M3XE00|M3XE00_FELCA	36 kDa	0	16	9	0
ATPase H+ transporting V1 subunit B2 OS=Felis catus GN=ATP6V1B2 PE=3 SV=1	tr|M3WIR6|M3WIR6_FELCA	57 kDa	0	4	19	0
Uncharacterized protein OS=Felis catus GN=CAPG PE=4 SV=1	tr|M3W087|M3W087_FELCA	39 kDa	3	20	0	0
Valyl-tRNA synthetase OS=Felis catus GN=VARS PE=3 SV=1	tr|M3W2B4|M3W2B4_FELCA	140 kDa	2	0	0	21
DnaJ heat shock protein family (Hsp40) member A2 OS=Felis catus GN=DNAJA2 PE=4 SV=1	tr|M3X8T9|M3X8T9_FELCA	45 kDa	0	22	0	0
RAS like proto-oncogene B OS=Felis catus GN=RALB PE=4 SV=1	tr|M3WYA0|M3WYA0_FELCA	23 kDa	23	0	0	0
Myosin VI OS=Felis catus GN=MYO6 PE=4 SV=1	tr|M3X1R1|M3X1R1_FELCA	149 kDa	0	0	0	23
CD109 molecule OS=Felis catus GN=CD109 PE=4 SV=1	tr|M3WHB7|M3WHB7_FELCA (+1)	162 kDa	4	0	0	17
Apolipoprotein A-IV OS=Felis catus GN=APOA4 PE=3 SV=2	sp|M3W955|APOA4_FELCA	44 kDa	0	19	0	0
RAB5B, member RAS oncogene family OS=Felis catus GN=RAB5B PE=4 SV=1	tr|M3WJU7|M3WJU7_FELCA	27 kDa	20	0	0	0
Oxoglutarate dehydrogenase OS=Felis catus GN=OGDH PE=4 SV=1	tr|M3WCZ2|M3WCZ2_FELCA	116 kDa	0	0	0	22
Reversion inducing cysteine rich protein with kazal motifs OS=Felis catus GN=RECK PE=4 SV=1	tr|M3WHJ4|M3WHJ4_FELCA	104 kDa	0	0	0	22
Ras suppressor protein 1 OS=Felis catus GN=RSU1 PE=4 SV=1	tr|M3WJ24|M3WJ24_FELCA	32 kDa	22	0	0	0
Membrane metalloendopeptidase OS=Felis catus GN=MME PE=4 SV=1	tr|M3WUH9|M3WUH9_FELCA	86 kDa	0	0	0	22
Uncharacterized protein OS=Felis catus PE=4 SV=1	tr|M3W1H0|M3W1H0_FELCA	11 kDa	11	0	3	5
Uncharacterized protein OS=Felis catus PE=4 SV=1	tr|M3WSV5|M3WSV5_FELCA	61 kDa	0	2	0	17
Adaptor related protein complex 2 mu 1 subunit OS=Felis catus GN=AP2M1 PE=3 SV=1	tr|M3W8D5|M3W8D5_FELCA	49 kDa	3	5	12	0
Uncharacterized protein OS=Felis catus PE=4 SV=1	tr|M3XG21|M3XG21_FELCA	26 kDa	15	0	2	4
Proteasome 26S subunit, ATPase 6 OS=Felis catus GN=PSMC6 PE=3 SV=1	tr|M3WNQ7|M3WNQ7_FELCA	46 kDa	2	10	0	8
AP complex subunit beta OS=Felis catus GN=AP2B1 PE=3 SV=1	tr|M3WD64|M3WD64_FELCA (+1)	106 kDa	8	0	0	37
Proteasome 26S subunit, ATPase 2 OS=Felis catus GN=PSMC2 PE=3 SV=1	tr|M3VV51|M3VV51_FELCA	49 kDa	0	8	0	14
Alpha 2-HS glycoprotein OS=Felis catus GN=AHSG PE=3 SV=1	tr|M3WG97|M3WG97_FELCA	39 kDa	0	7	13	0
Aldo-keto reductase family 1 member B OS=Felis catus GN=AKR1B1 PE=4 SV=1	tr|M3WHU0|M3WHU0_FELCA	36 kDa	8	13	0	0
Rho GTPase activating protein 1 OS=Felis catus GN=ARHGAP1 PE=4 SV=1	tr|M3WJ76|M3WJ76_FELCA	50 kDa	0	18	3	0
Stomatin OS=Felis catus GN=STOM PE=4 SV=1	tr|M3XCB8|M3XCB8_FELCA	31 kDa	19	0	0	2
Fumarate hydratase OS=Felis catus GN=FH PE=3 SV=1	tr|M3W459|M3W459_FELCA	50 kDa	0	18	0	0
Uncharacterized protein OS=Felis catus GN=CSNK2A1 PE=3 SV=1	tr|M3W025|M3W025_FELCA	45 kDa	0	21	0	0
Prominin 2 OS=Felis catus GN=PROM2 PE=4 SV=1	tr|M3WDQ9|M3WDQ9_FELCA	93 kDa	0	0	0	21
Sepiapterin reductase (7,8-dihydrobiopterin:NADP+ oxidoreductase) OS=Felis catus GN=SPR PE=4 SV=1	tr|M3WWH9|M3WWH9_FELCA	29 kDa	21	0	0	0
Importin 5 OS=Felis catus GN=IPO5 PE=4 SV=1	tr|M3WXS9|M3WXS9_FELCA	124 kDa	0	0	0	21
Eukaryotic translation initiation factor 3 subunit F OS=Felis catus GN=EIF3F PE=3 SV=1	tr|M3X4G2|M3X4G2_FELCA	39 kDa	0	0	21	0
Tubulin beta chain OS=Felis catus PE=3 SV=1	tr|M3W0Z9|M3W0Z9_FELCA	50 kDa	22	38	63	53
Uncharacterized protein OS=Felis catus PE=3 SV=1	tr|M3WAB5|M3WAB5_FELCA	16 kDa	6	5	3	7
Proteasome 26S subunit, non-ATPase 5 OS=Felis catus GN=PSMD5 PE=4 SV=1	tr|M3VWE7|M3VWE7_FELCA	56 kDa	0	9	9	0
Uncharacterized protein OS=Felis catus PE=4 SV=1	tr|M3WZU6|M3WZU6_FELCA	13 kDa	3	3	9	5
GNAS complex locus OS=Felis catus GN=GNAS PE=4 SV=1	tr|M3WFF6|M3WFF6_FELCA	124 kDa	3	15	2	0
40S ribosomal protein SA OS=Felis catus GN=RPSA PE=3 SV=1	tr|M3VZ17|M3VZ17_FELCA	33 kDa	7	11	2	0
Progesterone receptor membrane component 1 OS=Felis catus GN=PGRMC1 PE=3 SV=1	tr|M3WUA3|M3WUA3_FELCA	22 kDa	14	3	0	2
Uncharacterized protein OS=Felis catus GN=CD34 PE=4 SV=1	tr|M3W8J9|M3W8J9_FELCA	40 kDa	0	0	4	15
Glutamate dehydrogenase OS=Felis catus GN=GLUD1 PE=3 SV=1	tr|M3W8Q7|M3W8Q7_FELCA	47 kDa	0	5	15	0
Mannose-6-phosphate receptor, cation dependent OS=Felis catus GN=M6PR PE=4 SV=1	tr|M3WMA7|M3WMA7_FELCA	31 kDa	0	17	3	0
Uncharacterized protein OS=Felis catus GN=HADHB PE=3 SV=1	tr|M3WLM4|M3WLM4_FELCA	51 kDa	0	19	0	0
Hypoxia up-regulated 1 OS=Felis catus GN=HYOU1 PE=3 SV=1	tr|M3VW30|M3VW30_FELCA	112 kDa	0	0	0	20
Thioredoxin reductase 1 OS=Felis catus GN=TXNRD1 PE=3 SV=1	tr|M3W0Q4|M3W0Q4_FELCA	68 kDa	0	0	20	0
Ubiquinol-cytochrome c reductase core protein II OS=Felis catus GN=UQCRC2 PE=3 SV=1	tr|M3W8B7|M3W8B7_FELCA	43 kDa	0	20	0	0
Tyrosine 3-monooxygenase/tryptophan 5-monooxygenase activation protein beta OS=Felis catus GN=YWHAB PE=3 SV=1	tr|M3WFK3|M3WFK3_FELCA	28 kDa	44	0	0	0
S-methyl-5'-thioadenosine phosphorylase OS=Felis catus GN=MTAP PE=3 SV=1	tr|M3WS42|M3WS42_FELCA	30 kDa	19	0	0	0
Uncharacterized protein OS=Felis catus GN=LOC101092708 PE=4 SV=1	tr|M3WZ28|M3WZ28_FELCA	19 kDa	8	5	5	0
Heterogeneous nuclear ribonucleoprotein M OS=Felis catus GN=HNRNPM PE=4 SV=1	tr|M3WM68|M3WM68_FELCA	78 kDa	6	0	9	3
Epididymal sperm binding protein 1 OS=Felis catus GN=ELSPBP1 PE=4 SV=1	tr|M3WDK8|M3WDK8_FELCA	29 kDa	13	4	2	0
Moesin OS=Felis catus GN=MSN PE=4 SV=1	tr|M3WJI8|M3WJI8_FELCA	68 kDa	0	15	23	14
Tryptophanyl-tRNA synthetase OS=Felis catus GN=WARS PE=3 SV=1	tr|M3WCI7|M3WCI7_FELCA	53 kDa	0	2	14	3
Atlastin GTPase 3 OS=Felis catus GN=ATL3 PE=4 SV=1	tr|M3WUB4|M3WUB4_FELCA	60 kDa	0	0	15	0
NADH-cytochrome b5 reductase OS=Felis catus GN=CYB5R3 PE=3 SV=1	tr|M3XGA7|M3XGA7_FELCA	32 kDa	15	4	0	0
Galectin OS=Felis catus GN=LGALS3 PE=4 SV=1	tr|M3WXZ9|M3WXZ9_FELCA	29 kDa	16	3	0	0
Protein kinase cAMP-dependent type II regulatory subunit alpha OS=Felis catus GN=PRKAR2A PE=4 SV=1	tr|M3WRP3|M3WRP3_FELCA	45 kDa	0	0	18	0
Interleukin enhancer binding factor 2 OS=Felis catus GN=ILF2 PE=4 SV=1	tr|M3W936|M3W936_FELCA	43 kDa	0	18	0	0
Uncharacterized protein OS=Felis catus GN=DNAJB11 PE=4 SV=1	tr|M3WG96|M3WG96_FELCA (+1)	40 kDa	0	18	0	0
Carbonic anhydrase 2 OS=Felis catus GN=CA2 PE=4 SV=1	tr|M3W3J4|M3W3J4_FELCA	29 kDa	19	0	0	0
Fructose-bisphosphate aldolase OS=Felis catus GN=ALDOC PE=3 SV=1	tr|M3W9A0|M3W9A0_FELCA	39 kDa	0	25	0	0
DnaJ heat shock protein family (Hsp40) member A1 OS=Felis catus GN=DNAJA1 PE=3 SV=1	tr|M3WA49|M3WA49_FELCA	45 kDa	0	19	0	0
Aldehyde dehydrogenase 7 family member A1 OS=Felis catus GN=ALDH7A1 PE=3 SV=1	tr|M3XAZ0|M3XAZ0_FELCA	59 kDa	0	2	14	2
Adaptor related protein complex 2 alpha 2 subunit OS=Felis catus GN=AP2A2 PE=4 SV=1	tr|M3WI80|M3WI80_FELCA	104 kDa	2	0	0	33
Septin 11 OS=Felis catus GN=SEPT11 PE=3 SV=1	tr|M3XF82|M3XF82_FELCA	50 kDa	0	6	13	0
Polypeptide N-acetylgalactosaminyltransferase OS=Felis catus GN=GALNT2 PE=3 SV=1	tr|M3W8C0|M3W8C0_FELCA	65 kDa	0	0	17	0
Trans-golgi network protein 2 OS=Felis catus GN=TGOLN2 PE=4 SV=1	tr|M3WMM3|M3WMM3_FELCA	47 kDa	0	0	0	17
Uncharacterized protein OS=Felis catus PE=4 SV=1	tr|M3W5R5|M3W5R5_FELCA	159 kDa	0	0	0	17
Coatomer subunit epsilon OS=Felis catus GN=COPE PE=3 SV=1	tr|M3WC23|M3WC23_FELCA	34 kDa	17	0	0	0
Quinoid dihydropteridine reductase OS=Felis catus GN=QDPR PE=4 SV=1	tr|M3VZ80|M3VZ80_FELCA	26 kDa	18	0	0	0
Dolichyl-phosphate mannosyltransferase subunit 1, catalytic OS=Felis catus GN=DPM1 PE=4 SV=1	tr|M3WC50|M3WC50_FELCA	33 kDa	18	0	0	0
Neural cell adhesion molecule 1 OS=Felis catus GN=NCAM1 PE=4 SV=1	tr|M3WJP0|M3WJP0_FELCA	91 kDa	0	0	0	18
Phosphoglucomutase 1 OS=Felis catus GN=PGM1 PE=3 SV=1	tr|M3WVK0|M3WVK0_FELCA	55 kDa	0	0	18	0
Phenylalanyl-tRNA synthetase alpha subunit OS=Felis catus GN=FARSA PE=4 SV=1	tr|M3WVQ2|M3WVQ2_FELCA	57 kDa	0	0	18	0
ARP1 actin-related protein 1 homolog B, centractin beta OS=Felis catus GN=ACTR1B PE=3 SV=1	tr|M3XDN6|M3XDN6_FELCA	42 kDa	0	31	0	0
Copine 1 OS=Felis catus GN=CPNE1 PE=4 SV=1	tr|M3WPS9|M3WPS9_FELCA	59 kDa	0	0	13	4
Uncharacterized protein OS=Felis catus GN=PSME1 PE=4 SV=1	tr|M3W4B6|M3W4B6_FELCA	29 kDa	13	0	3	0
SEC22 homolog B, vesicle trafficking protein (gene/pseudogene) OS=Felis catus GN=SEC22B PE=3 SV=1	tr|M3X0S7|M3X0S7_FELCA	25 kDa	14	0	0	0
60S acidic ribosomal protein P0 OS=Felis catus GN=RPLP0 PE=3 SV=1	tr|M3WIQ1|M3WIQ1_FELCA	34 kDa	12	5	0	0
Glycosyltransferase 8 domain containing 1 OS=Felis catus GN=GLT8D1 PE=4 SV=1	tr|M3WN57|M3WN57_FELCA	42 kDa	0	11	6	0
Malate dehydrogenase, cytoplasmic OS=Felis catus GN=MDH1 PE=2 SV=3	sp|Q7YRU4|MDHC_FELCA	36 kDa	14	3	0	0
Rab GDP dissociation inhibitor OS=Felis catus GN=GDI1 PE=3 SV=1	tr|M3WF17|M3WF17_FELCA	51 kDa	0	0	28	0
Keratin 19 OS=Felis catus GN=KRT19 PE=3 SV=1	tr|M3VXK3|M3VXK3_FELCA	44 kDa	0	18	0	0
Uncharacterized protein OS=Felis catus GN=GSTP1 PE=4 SV=1	tr|M3VX82|M3VX82_FELCA	24 kDa	17	0	0	0
Bleomycin hydrolase OS=Felis catus GN=BLMH PE=4 SV=1	tr|M3W1G9|M3W1G9_FELCA	52 kDa	0	17	0	0
Synaptosomal-associated protein OS=Felis catus GN=SNAP23 PE=3 SV=1	tr|M3WIS2|M3WIS2_FELCA	25 kDa	17	0	0	0
GDP-mannose pyrophosphorylase A OS=Felis catus GN=GMPPA PE=4 SV=1	tr|M3WU81|M3WU81_FELCA	46 kDa	0	17	0	0
Family with sequence similarity 3 member C OS=Felis catus GN=FAM3C PE=4 SV=1	tr|M3WVJ8|M3WVJ8_FELCA	25 kDa	17	0	0	0
Proteasome subunit beta type OS=Felis catus GN=PSMB1 PE=3 SV=1	tr|M3X6T9|M3X6T9_FELCA	26 kDa	17	0	0	0
Thy-1 cell surface antigen OS=Felis catus GN=THY1 PE=4 SV=1	tr|M3WYY4|M3WYY4_FELCA	18 kDa	3	8	5	0
Tetraspanin OS=Felis catus GN=TSPAN8 PE=3 SV=1	tr|M3WJQ8|M3WJQ8_FELCA	26 kDa	13	2	0	0
Ribonuclease A family member 10 (inactive) OS=Felis catus GN=RNASE10 PE=3 SV=1	tr|M3W6S6|M3W6S6_FELCA	24 kDa	9	7	0	0
Uncharacterized protein OS=Felis catus GN=ALDH2 PE=3 SV=1	tr|M3X7B5|M3X7B5_FELCA	56 kDa	0	8	18	0
Prenylcysteine oxidase 1 OS=Felis catus GN=PCYOX1 PE=3 SV=1	tr|M3WSQ5|M3WSQ5_FELCA	57 kDa	2	0	14	0
Eukaryotic translation initiation factor 3 subunit D OS=Felis catus GN=EIF3D PE=3 SV=1	tr|M3VW18|M3VW18_FELCA	64 kDa	0	2	14	0
Uncharacterized protein OS=Felis catus PE=4 SV=1	tr|M3W8H0|M3W8H0_FELCA	23 kDa	0	14	2	0
Pre-mRNA processing factor 19 OS=Felis catus GN=PRPF19 PE=4 SV=1	tr|M3WJ97|M3WJ97_FELCA	55 kDa	0	2	12	0
Serpin family A member 1 OS=Felis catus GN=SERPINA1 PE=3 SV=1	tr|M3WCX1|M3WCX1_FELCA	47 kDa	0	0	15	0
Translin OS=Felis catus GN=TSN PE=4 SV=1	tr|M3X4R2|M3X4R2_FELCA	26 kDa	15	0	0	0
Platelet and endothelial cell adhesion molecule 1 OS=Felis catus GN=PECAM1 PE=4 SV=1	tr|M3W0H0|M3W0H0_FELCA	78 kDa	0	0	0	16
Transmembrane p24 trafficking protein 9 OS=Felis catus GN=TMED9 PE=3 SV=1	tr|M3W549|M3W549_FELCA	27 kDa	16	0	0	0
Family with sequence similarity 3 member D OS=Felis catus GN=FAM3D PE=4 SV=1	tr|M3W626|M3W626_FELCA	25 kDa	16	0	0	0
Eukaryotic translation elongation factor 1 beta 2 OS=Felis catus GN=EEF1B2 PE=3 SV=1	tr|M3WCX7|M3WCX7_FELCA	25 kDa	16	0	0	0
Saccharopine dehydrogenase (putative) OS=Felis catus GN=SCCPDH PE=4 SV=1	tr|M3WDM6|M3WDM6_FELCA	43 kDa	0	16	0	0
Extended synaptotagmin 1 OS=Felis catus GN=ESYT1 PE=4 SV=1	tr|M3WLH6|M3WLH6_FELCA	123 kDa	0	0	0	16
Actin-related protein 10 homolog OS=Felis catus GN=ACTR10 PE=3 SV=1	tr|M3WSZ8|M3WSZ8_FELCA	46 kDa	0	16	0	0
Glucosamine-6-phosphate isomerase OS=Felis catus GN=GNPDA2 PE=3 SV=1	tr|M3X7J4|M3X7J4_FELCA	31 kDa	16	0	0	0
Immunoglobulin heavy constant mu OS=Felis catus GN=IGHM PE=4 SV=1	tr|M3XBM6|M3XBM6_FELCA	55 kDa	0	0	0	16
Uncharacterized protein OS=Felis catus GN=LOC101091022 PE=3 SV=1	tr|M3W226|M3W226_FELCA	70 kDa	4	7	12	4
Integral membrane protein 2B OS=Felis catus GN=ITM2B PE=4 SV=1	tr|M3XCZ5|M3XCZ5_FELCA	26 kDa	2	7	2	4
Ribosomal protein L11 OS=Felis catus GN=RPL11 PE=3 SV=1	tr|M3WUL6|M3WUL6_FELCA	20 kDa	6	3	0	5
60S ribosomal protein L17 OS=Felis catus GN=RPL17 PE=2 SV=3	sp|Q5XTY7|RL17_FELCA	21 kDa	8	4	0	3
Ribosomal protein L13a OS=Felis catus GN=RPL13A PE=3 SV=1	tr|M3WAY9|M3WAY9_FELCA	23 kDa	12	0	0	2
Tubulin beta chain OS=Felis catus GN=TUBB2A PE=3 SV=1	tr|M3WL16|M3WL16_FELCA	50 kDa	0	0	60	52
Endoplasmic reticulum oxidoreductase 1 alpha OS=Felis catus GN=ERO1A PE=4 SV=1	tr|M3X8L8|M3X8L8_FELCA	54 kDa	0	2	13	0
Uncharacterized protein OS=Felis catus PE=3 SV=1	tr|M3W2B8|M3W2B8_FELCA	141 kDa	0	0	0	13
Uncharacterized protein OS=Felis catus PE=4 SV=1	tr|M3X5C8|M3X5C8_FELCA	21 kDa	2	13	0	0
Endoplasmic reticulum lectin 1 OS=Felis catus GN=ERLEC1 PE=4 SV=1	tr|M3WIQ5|M3WIQ5_FELCA	55 kDa	0	13	0	0
Uncharacterized protein OS=Felis catus GN=TPM3 PE=3 SV=1	tr|M3WH86|M3WH86_FELCA	33 kDa	14	0	0	0
Sorting nexin 5 OS=Felis catus GN=SNX5 PE=4 SV=1	tr|M3W4Q8|M3W4Q8_FELCA	45 kDa	0	14	0	0
Cyclophilin D OS=Felis catus GN=PPID PE=2 SV=1	tr|G3XEW7|G3XEW7_FELCA	41 kDa	0	15	0	0
Tyrosine 3-monooxygenase/tryptophan 5-monooxygenase activation protein eta OS=Felis catus GN=YWHAH PE=3 SV=1	tr|M3VV31|M3VV31_FELCA	25 kDa	27	0	0	0
Tyrosine 3-monooxygenase/tryptophan 5-monooxygenase activation protein gamma OS=Felis catus GN=YWHAG PE=3 SV=1	tr|M3VWG1|M3VWG1_FELCA	28 kDa	33	0	0	0
Methionyl-tRNA synthetase OS=Felis catus GN=MARS PE=3 SV=1	tr|M3VXV4|M3VXV4_FELCA	101 kDa	0	0	0	15
Exportin 1 OS=Felis catus GN=XPO1 PE=4 SV=1	tr|M3VYZ8|M3VYZ8_FELCA	118 kDa	0	0	0	15
Ubiquitinyl hydrolase 1 OS=Felis catus GN=USP5 PE=3 SV=1	tr|M3W1X0|M3W1X0_FELCA	96 kDa	0	0	0	15
Phosphoglucomutase 5 OS=Felis catus GN=PGM5 PE=3 SV=1	tr|M3W8V6|M3W8V6_FELCA	45 kDa	0	0	15	0
Exportin 7 OS=Felis catus GN=XPO7 PE=4 SV=1	tr|M3WAJ4|M3WAJ4_FELCA	124 kDa	0	0	0	15
Inositol monophosphatase domain containing 1 OS=Felis catus GN=IMPAD1 PE=4 SV=1	tr|M3WCT5|M3WCT5_FELCA	36 kDa	0	15	0	0
S-adenosylmethionine synthase OS=Felis catus GN=MAT2A PE=3 SV=1	tr|M3WG37|M3WG37_FELCA	44 kDa	0	15	0	0
Citrate synthase OS=Felis catus GN=CS PE=3 SV=1	tr|M3WG68|M3WG68_FELCA	52 kDa	0	15	0	0
Dynein cytoplasmic 1 light intermediate chain 2 OS=Felis catus GN=DYNC1LI2 PE=4 SV=1	tr|M3WM88|M3WM88_FELCA (+1)	54 kDa	0	15	0	0
ER lipid raft associated 2 OS=Felis catus GN=ERLIN2 PE=4 SV=1	tr|M3WMT2|M3WMT2_FELCA	37 kDa	0	15	0	0
Proteasome subunit alpha type OS=Felis catus GN=PSMA2 PE=3 SV=1	tr|M3XAA2|M3XAA2_FELCA	26 kDa	15	0	0	0
S100 calcium binding protein A10 OS=Felis catus GN=S100A10 PE=3 SV=1	tr|M3WD86|M3WD86_FELCA	11 kDa	4	8	2	0
Peroxiredoxin 4 OS=Felis catus GN=PRDX4 PE=4 SV=1	tr|M3W1F3|M3W1F3_FELCA	31 kDa	13	0	0	0
Cytochrome P450 family 1 subfamily B member 1 OS=Felis catus GN=CYP1B1 PE=3 SV=1	tr|M3XDH9|M3XDH9_FELCA	50 kDa	0	0	9	3
Procollagen C-endopeptidase enhancer OS=Felis catus GN=PCOLCE PE=4 SV=1	tr|M3W6K9|M3W6K9_FELCA	49 kDa	0	5	9	0
Myoferlin OS=Felis catus GN=MYOF PE=4 SV=1	tr|M3WCE4|M3WCE4_FELCA	232 kDa	0	0	0	12
Uncharacterized protein OS=Felis catus GN=LOC102899262 PE=3 SV=1	tr|M3VWH3|M3VWH3_FELCA (+1)	30 kDa	13	0	0	0
Histidyl-tRNA synthetase OS=Felis catus GN=HARS PE=3 SV=1	tr|M3VWD2|M3VWD2_FELCA	57 kDa	0	0	0	14
Proteasome subunit beta OS=Felis catus GN=PSMB4 PE=3 SV=1	tr|M3VXE9|M3VXE9_FELCA	29 kDa	15	0	0	0
TMED7-TICAM2 readthrough OS=Felis catus GN=TMED7-TICAM2 PE=3 SV=1	tr|M3VXT2|M3VXT2_FELCA	41 kDa	14	0	0	0
EGF domain specific O-linked N-acetylglucosamine transferase OS=Felis catus GN=EOGT PE=4 SV=1	tr|M3W586|M3W586_FELCA	62 kDa	0	0	14	0
Flavin-containing monooxygenase OS=Felis catus GN=FMO2 PE=3 SV=1	tr|M3W9L1|M3W9L1_FELCA	61 kDa	0	0	14	0
Dynactin subunit 1 OS=Felis catus GN=DCTN1 PE=4 SV=1	tr|M3W9X0|M3W9X0_FELCA	139 kDa	0	0	0	14
Beta-galactosidase OS=Felis catus GN=GLB1L2 PE=3 SV=1	tr|M3WJE3|M3WJE3_FELCA	72 kDa	0	0	14	0
Calpain small subunit 1 OS=Felis catus GN=CAPNS1 PE=4 SV=1	tr|M3WK60|M3WK60_FELCA	28 kDa	14	0	0	0
Chloride intracellular channel protein OS=Felis catus GN=CLIC4 PE=3 SV=1	tr|M3WWJ9|M3WWJ9_FELCA	26 kDa	14	0	0	0
RAB21, member RAS oncogene family OS=Felis catus GN=RAB21 PE=4 SV=1	tr|M3WZY9|M3WZY9_FELCA	24 kDa	14	0	0	0
Tax_Id=9606 Gene_Symbol=KRT1 Keratin, type II cytoskeletal 1	IPI:CON_00220327.3|SWISS-PROT:P04264	66 kDa	13	2	0	0
RAB1A, member RAS oncogene family OS=Felis catus GN=RAB1A PE=4 SV=1	tr|M3VYP9|M3VYP9_FELCA	23 kDa	11	0	0	0
Uncharacterized protein OS=Felis catus PE=4 SV=1	tr|M3WYA8|M3WYA8_FELCA	24 kDa	6	0	0	7
Serine and arginine rich splicing factor 7 OS=Felis catus GN=SRSF7 PE=4 SV=1	tr|M3WYE6|M3WYE6_FELCA	27 kDa	11	2	0	0
UDP-glucose 6-dehydrogenase OS=Felis catus GN=UGDH PE=3 SV=1	tr|M3WBQ9|M3WBQ9_FELCA	55 kDa	0	0	12	0
Nucleosome assembly protein 1 like 4 OS=Felis catus GN=NAP1L4 PE=3 SV=1	tr|M3W6T3|M3W6T3_FELCA	44 kDa	0	0	11	0
Ras homolog family member A OS=Felis catus GN=RHOA PE=3 SV=1	tr|M3WU80|M3WU80_FELCA	22 kDa	12	0	0	0
G protein subunit alpha 14 OS=Felis catus GN=GNA14 PE=4 SV=1	tr|M3WWZ2|M3WWZ2_FELCA	42 kDa	0	12	0	0
RAB5C, member RAS oncogene family OS=Felis catus GN=RAB5C PE=4 SV=1	tr|M3VXZ7|M3VXZ7_FELCA	23 kDa	18	0	0	0
Epoxide hydrolase 2 OS=Felis catus GN=EPHX2 PE=4 SV=1	tr|M3WKP1|M3WKP1_FELCA	62 kDa	0	0	12	0
ARP2 actin related protein 2 homolog OS=Felis catus GN=ACTR2 PE=3 SV=1	tr|M3W369|M3W369_FELCA	45 kDa	0	14	0	0
Glucosaminyl (N-acetyl) transferase 4, core 2 OS=Felis catus GN=GCNT4 PE=4 SV=1	tr|M3WRM6|M3WRM6_FELCA	50 kDa	0	0	13	0
Transmembrane p24 trafficking protein 4 OS=Felis catus GN=TMED4 PE=3 SV=1	tr|M3WCZ0|M3WCZ0_FELCA	27 kDa	15	0	0	0
Ras-related C3 botulinum toxin substrate 1 (rho family, small GTP binding protein Rac1) OS=Felis catus GN=RAC1 PE=3 SV=1	tr|M3WEZ2|M3WEZ2_FELCA	24 kDa	13	0	0	0
SEC14 like lipid binding 2 OS=Felis catus GN=SEC14L2 PE=4 SV=1	tr|M3WG18|M3WG18_FELCA	46 kDa	0	13	0	0
Adenylate kinase isoenzyme 1 OS=Felis catus GN=AK1 PE=3 SV=1	tr|M3WX07|M3WX07_FELCA	23 kDa	13	0	0	0
Uncharacterized protein OS=Felis catus GN=FLAI-K PE=3 SV=1	tr|M3WYM6|M3WYM6_FELCA	41 kDa	0	13	0	0
3-hydroxybutyrate dehydrogenase 2 OS=Felis catus GN=BDH2 PE=4 SV=1	tr|M3XGD5|M3XGD5_FELCA	27 kDa	13	0	0	0
Heterogeneous nuclear ribonucleoprotein K OS=Felis catus GN=HNRNPK PE=4 SV=1	tr|M3WLH7|M3WLH7_FELCA	51 kDa	4	4	4	2
Ribosomal protein L34 OS=Felis catus GN=RPL34 PE=4 SV=1	tr|M3WMR1|M3WMR1_FELCA	13 kDa	2	3	3	4
Uncharacterized protein OS=Felis catus PE=4 SV=1	tr|M3WPZ3|M3WPZ3_FELCA	12 kDa	13	0	0	0
60S ribosomal protein L29 OS=Felis catus GN=RPL29 PE=3 SV=1	tr|M3X8C2|M3X8C2_FELCA	18 kDa	6	3	0	2
Uncharacterized protein OS=Felis catus GN=LOC102899273 PE=4 SV=1	tr|M3WVX0|M3WVX0_FELCA	43 kDa	0	2	7	3
Radixin OS=Felis catus GN=RDX PE=4 SV=1	tr|M3WQU6|M3WQU6_FELCA	69 kDa	7	14	22	0
Uncharacterized protein OS=Felis catus GN=PSMC1 PE=3 SV=1	tr|M3WEV7|M3WEV7_FELCA	49 kDa	0	0	8	8
Uncharacterized protein OS=Felis catus GN=SYPL1 PE=4 SV=1	tr|M3WRE2|M3WRE2_FELCA	29 kDa	0	7	4	0
Dolichyl-diphosphooligosaccharide--protein glycosyltransferase subunit 1 OS=Felis catus GN=RPN1 PE=3 SV=1	tr|M3W966|M3W966_FELCA	60 kDa	0	0	6	5
Aspartate beta-hydroxylase OS=Felis catus GN=ASPH PE=4 SV=1	tr|M3X3R5|M3X3R5_FELCA	83 kDa	2	0	0	9
Heat shock protein 90 alpha family class B member 1 OS=Felis catus GN=HSP90AB1 PE=3 SV=1	tr|M3WC29|M3WC29_FELCA	83 kDa	0	0	0	25
COP9 signalosome subunit 4 OS=Felis catus GN=COPS4 PE=4 SV=1	tr|M3XBM5|M3XBM5_FELCA	46 kDa	2	10	0	0
Glutaminyl-tRNA synthetase OS=Felis catus GN=QARS PE=3 SV=1	tr|M3WC86|M3WC86_FELCA	88 kDa	0	0	4	8
Dihydropyrimidinase OS=Felis catus GN=DPYS PE=4 SV=1	tr|M3WAK7|M3WAK7_FELCA	48 kDa	0	0	12	0
Eukaryotic translation initiation factor 3 subunit I OS=Felis catus GN=EIF3I PE=3 SV=1	tr|M3X6Y9|M3X6Y9_FELCA	36 kDa	0	11	0	0
COP9 signalosome subunit 2 OS=Felis catus GN=COPS2 PE=4 SV=1	tr|M3XER3|M3XER3_FELCA	52 kDa	0	11	0	0
Prohibitin OS=Felis catus GN=PHB PE=2 SV=1	tr|A8WA76|A8WA76_FELCA	30 kDa	12	0	0	0
Protein disulfide isomerase family A member 5 OS=Felis catus GN=PDIA5 PE=4 SV=1	tr|M3VVP1|M3VVP1_FELCA	60 kDa	0	0	12	0
S100 calcium binding protein A8 OS=Felis catus GN=S100A8 PE=3 SV=1	tr|M3VWD6|M3VWD6_FELCA	9 kDa	12	0	0	0
Chromosome 16 open reading frame 62 OS=Felis catus GN=C16orf62 PE=4 SV=1	tr|M3W9G7|M3W9G7_FELCA	110 kDa	0	0	0	12
Family with sequence similarity 3 member A OS=Felis catus GN=FAM3A PE=4 SV=1	tr|M3WF20|M3WF20_FELCA	25 kDa	12	0	0	0
Dicarbonyl and L-xylulose reductase OS=Felis catus GN=DCXR PE=4 SV=1	tr|M3WFI7|M3WFI7_FELCA	26 kDa	12	0	0	0
G protein pathway suppressor 1 OS=Felis catus GN=GPS1 PE=4 SV=1	tr|M3WFJ5|M3WFJ5_FELCA	56 kDa	0	0	14	0
Adhesion G protein-coupled receptor G2 OS=Felis catus GN=ADGRG2 PE=3 SV=1	tr|M3WP79|M3WP79_FELCA	106 kDa	0	0	0	12
Uncharacterized protein OS=Felis catus PE=4 SV=1	tr|M3WRW5|M3WRW5_FELCA (+1)	26 kDa	12	0	0	0
Proteasome 26S subunit, non-ATPase 7 OS=Felis catus GN=PSMD7 PE=4 SV=1	tr|M3WTN9|M3WTN9_FELCA	37 kDa	0	12	0	0
Glutathione S-transferase omega 1 OS=Felis catus GN=GSTO1 PE=4 SV=1	tr|M3WTU7|M3WTU7_FELCA	27 kDa	12	0	0	0
Sulfotransferase OS=Felis catus GN=LOC101088902 PE=3 SV=1	tr|M3WW93|M3WW93_FELCA	34 kDa	12	0	0	0
Peptidase inhibitor 16 OS=Felis catus GN=PI16 PE=3 SV=1	tr|M3WXF2|M3WXF2_FELCA	49 kDa	0	0	0	12
Lactoylglutathione lyase OS=Felis catus GN=GLO1 PE=3 SV=1	tr|M3X4B1|M3X4B1_FELCA	21 kDa	12	0	0	0
Ectonucleotide pyrophosphatase/phosphodiesterase 1 OS=Felis catus GN=ENPP1 PE=4 SV=1	tr|M3XBL3|M3XBL3_FELCA	97 kDa	0	0	0	13
Hydroxysteroid 17-beta dehydrogenase 12 OS=Felis catus GN=HSD17B12 PE=3 SV=1	tr|M3XF85|M3XF85_FELCA	34 kDa	12	0	0	0
Uncharacterized protein OS=Felis catus GN=CFL1 PE=3 SV=1	tr|M3WIJ6|M3WIJ6_FELCA	19 kDa	2	2	2	5
Fibrinogen alpha chain OS=Felis catus GN=FGA PE=4 SV=1	tr|M3W022|M3W022_FELCA	94 kDa	2	0	3	5
Serine and arginine rich splicing factor 4 OS=Felis catus GN=SRSF4 PE=4 SV=1	tr|M3X8K9|M3X8K9_FELCA	45 kDa	7	0	7	4
Tyrosine-protein kinase OS=Felis catus GN=SRC PE=3 SV=1	tr|M3W6V8|M3W6V8_FELCA	60 kDa	0	2	7	2
Folate receptor 1 OS=Felis catus GN=FOLR1 PE=4 SV=1	tr|M3WR11|M3WR11_FELCA	29 kDa	0	7	3	0
Adaptor related protein complex 3 mu 1 subunit OS=Felis catus GN=AP3M1 PE=3 SV=1	tr|M3VVD7|M3VVD7_FELCA	47 kDa	0	10	0	0
Vitronectin OS=Felis catus GN=VTN PE=4 SV=1	tr|M3W9I5|M3W9I5_FELCA	54 kDa	0	0	2	8
60S ribosomal protein L24 OS=Felis catus GN=RPL24 PE=2 SV=1	sp|Q66WF5|RL24_FELCA (+1)	18 kDa	6	3	0	0
Peptidylprolyl isomerase OS=Felis catus GN=FKBP4 PE=4 SV=1	tr|M3VU61|M3VU61_FELCA	51 kDa	0	5	6	0
PDZ domain containing 1 OS=Felis catus GN=PDZK1 PE=4 SV=1	tr|M3WIQ9|M3WIQ9_FELCA	57 kDa	0	5	6	0
Na(+)/H(+) exchange regulatory cofactor NHE-RF OS=Felis catus GN=SLC9A3R1 PE=4 SV=1	tr|M3WUV9|M3WUV9_FELCA	39 kDa	0	5	6	0
Uncharacterized protein OS=Felis catus PE=3 SV=1	tr|M3VYP6|M3VYP6_FELCA	40 kDa	0	9	0	2
Tax_Id=9606 Gene_Symbol=KRT9 Keratin, type I cytoskeletal 9	IPI:CON_00019359.3|SWISS-PROT:P35527	62 kDa	10	0	0	0
Calumenin OS=Felis catus GN=CALU PE=4 SV=1	tr|M3WSV1|M3WSV1_FELCA	29 kDa	0	10	0	0
Heterogeneous nuclear ribonucleoprotein A3 OS=Felis catus GN=HNRNPA3 PE=4 SV=1	tr|M3WGE6|M3WGE6_FELCA	40 kDa	10	0	0	0
Titin OS=Felis catus GN=TTN PE=4 SV=1	tr|M3WG03|M3WG03_FELCA	3715 kDa	7	7	0	0
Karyopherin subunit beta 1 OS=Felis catus GN=KPNB1 PE=4 SV=1	tr|M3WXK0|M3WXK0_FELCA	97 kDa	0	0	0	9
Reticulocalbin 2 OS=Felis catus GN=RCN2 PE=4 SV=1	tr|M3WSZ0|M3WSZ0_FELCA	27 kDa	0	10	0	0
Anion exchange protein OS=Felis catus GN=SLC4A1 PE=3 SV=1	tr|M3VZM4|M3VZM4_FELCA	105 kDa	0	9	0	0
Arp2/3 complex 34 kDa subunit OS=Felis catus PE=3 SV=1	tr|M3VYD8|M3VYD8_FELCA	43 kDa	10	0	0	0
L-lactate dehydrogenase OS=Felis catus GN=LDHA PE=3 SV=1	tr|M3WN67|M3WN67_FELCA	40 kDa	12	0	0	0
Catenin alpha 1 OS=Felis catus GN=CTNNA1 PE=4 SV=1	tr|M3VX56|M3VX56_FELCA	100 kDa	0	0	0	10
Peptidyl-prolyl cis-trans isomerase OS=Felis catus GN=PPIB PE=2 SV=1	tr|G3XEW6|G3XEW6_FELCA	24 kDa	11	0	0	0
Integrin beta OS=Felis catus GN=ITGB2 PE=3 SV=1	tr|M3VY84|M3VY84_FELCA	85 kDa	0	0	0	11
Glutathione S-transferase alpha 4 OS=Felis catus GN=GSTA4 PE=4 SV=1	tr|M3W3Q1|M3W3Q1_FELCA	26 kDa	11	0	0	0
FAM20B, glycosaminoglycan xylosylkinase OS=Felis catus GN=FAM20B PE=4 SV=1	tr|M3W3U4|M3W3U4_FELCA	46 kDa	0	11	0	0
Golgi SNAP receptor complex member 1 OS=Felis catus GN=GOSR1 PE=3 SV=1	tr|M3W5L4|M3W5L4_FELCA	29 kDa	11	0	0	0
Enoyl-CoA delta isomerase 1 OS=Felis catus GN=ECI1 PE=3 SV=1	tr|M3W858|M3W858_FELCA	33 kDa	11	0	0	0
GDP-mannose pyrophosphorylase B OS=Felis catus GN=GMPPB PE=4 SV=1	tr|M3WDQ0|M3WDQ0_FELCA	43 kDa	0	11	0	0
Uncharacterized protein OS=Felis catus GN=HNRNPUL2 PE=4 SV=1	tr|M3WLA8|M3WLA8_FELCA	78 kDa	0	0	0	11
RAS like proto-oncogene A OS=Felis catus GN=RALA PE=4 SV=1	tr|M3WV28|M3WV28_FELCA	24 kDa	21	0	0	0
Uncharacterized protein OS=Felis catus GN=ACY1 PE=4 SV=1	tr|M3WZA0|M3WZA0_FELCA	45 kDa	0	11	0	0
Proteasome subunit beta type OS=Felis catus GN=PSMB5 PE=3 SV=1	tr|M3X375|M3X375_FELCA	28 kDa	11	0	0	0
Carboxymethylenebutenolidase homolog OS=Felis catus GN=CMBL PE=4 SV=1	tr|M3X3U3|M3X3U3_FELCA	28 kDa	11	0	0	0
Importin 7 OS=Felis catus GN=IPO7 PE=4 SV=1	tr|M3XA23|M3XA23_FELCA	119 kDa	0	0	0	11
Tetraspanin OS=Felis catus GN=CD81 PE=3 SV=1	tr|M3W6S9|M3W6S9_FELCA	24 kDa	3	0	0	4
Heat shock protein family A (Hsp70) member 2 OS=Felis catus GN=HSPA2 PE=3 SV=1	tr|M3W8G1|M3W8G1_FELCA	70 kDa	0	0	17	10
Poly(rC) binding protein 1 OS=Felis catus GN=PCBP1 PE=4 SV=1	tr|M3WS36|M3WS36_FELCA	36 kDa	6	4	0	2	Saw staining at 25, 50, and 85 kDa. Heavier bands= 25 and 50.
Protein kinase cAMP-dependent type II regulatory subunit beta OS=Felis catus GN=PRKAR2B PE=4 SV=1	tr|M3XFF2|M3XFF2_FELCA	47 kDa	0	3	11	0
Galectin OS=Felis catus GN=LGALS1 PE=4 SV=1	tr|M3W9D5|M3W9D5_FELCA	15 kDa	7	2	0	0
Vacuolar protein sorting-associated protein 35 OS=Felis catus GN=VPS35 PE=3 SV=1	tr|M3VWJ8|M3VWJ8_FELCA	92 kDa	0	3	0	5
Eukaryotic translation initiation factor 3 subunit G OS=Felis catus GN=EIF3G PE=3 SV=1	tr|M3WBC3|M3WBC3_FELCA	35 kDa	0	7	0	0
F-actin-capping protein subunit alpha-2 OS=Felis catus GN=CAPZA2 PE=3 SV=1	sp|A0M8S9|CAZA2_FELCA (+1)	33 kDa	6	4	0	0
Milk fat globule-EGF factor 8 protein OS=Felis catus GN=MFGE8 PE=4 SV=1	tr|M3W678|M3W678_FELCA	50 kDa	0	8	2	0
Hemochromatosis OS=Felis catus GN=HFE PE=3 SV=1	tr|M3W522|M3W522_FELCA	39 kDa	0	8	2	0
Inter-alpha-trypsin inhibitor heavy chain 2 OS=Felis catus GN=ITIH2 PE=4 SV=1	tr|M3VU96|M3VU96_FELCA	107 kDa	0	0	0	8
Lumican OS=Felis catus GN=LUM PE=4 SV=1	tr|M3W0X1|M3W0X1_FELCA	38 kDa	0	0	8	0
UDP-glucose glycoprotein glucosyltransferase 1 OS=Felis catus GN=UGGT1 PE=4 SV=1	tr|M3VWB5|M3VWB5_FELCA	178 kDa	0	0	0	9
Enolase 2 OS=Felis catus GN=ENO2 PE=3 SV=1	tr|M3W1X4|M3W1X4_FELCA	47 kDa	0	17	0	0
Hemoglobin subunit beta-A/B OS=Felis catus GN=HBB PE=1 SV=1	sp|P07412|HBB_FELCA	16 kDa	9	0	0	0
Voltage dependent anion channel 2 OS=Felis catus GN=VDAC2 PE=4 SV=1	tr|M3X2J1|M3X2J1_FELCA	32 kDa	9	0	0	0
Carboxylic ester hydrolase OS=Felis catus GN=CES2 PE=3 SV=1	tr|M3W105|M3W105_FELCA	61 kDa	0	0	8	0
Syndecan binding protein OS=Felis catus GN=SDCBP PE=4 SV=1	tr|M3X7T2|M3X7T2_FELCA	32 kDa	9	0	0	0
Adenylosuccinate synthetase isozyme 2 OS=Felis catus GN=ADSS PE=3 SV=1	tr|M3X6H1|M3X6H1_FELCA	46 kDa	0	9	0	0
Ferritin heavy chain OS=Felis catus GN=FTH1 PE=2 SV=3	sp|Q2MHN2|FRIH_FELCA	21 kDa	10	0	0	0
Eukaryotic translation initiation factor 3 subunit M OS=Felis catus GN=EIF3M PE=3 SV=1	tr|M3VUI2|M3VUI2_FELCA	42 kDa	0	10	0	0
Coatomer subunit beta' OS=Felis catus GN=COPB2 PE=3 SV=1	tr|M3VWP9|M3VWP9_FELCA	102 kDa	0	0	0	10
SIL1 nucleotide exchange factor OS=Felis catus GN=SIL1 PE=4 SV=1	tr|M3VX58|M3VX58_FELCA	52 kDa	0	0	10	0
RAB5A, member RAS oncogene family OS=Felis catus GN=RAB5A PE=4 SV=1	tr|M3W279|M3W279_FELCA	27 kDa	17	0	0	0
Aminopeptidase OS=Felis catus GN=ERAP1 PE=3 SV=1	tr|M3W374|M3W374_FELCA	107 kDa	0	0	0	10
Phosphorylase kinase regulatory subunit beta OS=Felis catus GN=PHKB PE=4 SV=1	tr|M3W9V0|M3W9V0_FELCA	122 kDa	0	0	0	10
Succinate dehydrogenase [ubiquinone] iron-sulfur subunit, mitochondrial OS=Felis catus GN=SDHB PE=3 SV=1	tr|M3WCU6|M3WCU6_FELCA	32 kDa	10	0	0	0
Aldehyde dehydrogenase 1 family member A3 OS=Felis catus GN=ALDH1A3 PE=3 SV=1	tr|M3WDT8|M3WDT8_FELCA (+1)	54 kDa	0	0	15	0
Calcium/calmodulin dependent serine protein kinase OS=Felis catus GN=CASK PE=4 SV=1	tr|M3WEK7|M3WEK7_FELCA	105 kDa	0	0	0	10
Myosin ID OS=Felis catus GN=MYO1D PE=3 SV=1	tr|M3WGW9|M3WGW9_FELCA	113 kDa	0	0	0	10
Amine oxidase OS=Felis catus GN=AOC3 PE=3 SV=1	tr|M3WIA6|M3WIA6_FELCA	84 kDa	0	0	0	11
PTTG1 interacting protein OS=Felis catus GN=PTTG1IP PE=4 SV=1	tr|M3WIS3|M3WIS3_FELCA	19 kDa	10	0	0	0
Mitogen-activated protein kinase OS=Felis catus GN=MAPK3 PE=4 SV=1	tr|M3WK78|M3WK78_FELCA	43 kDa	0	10	0	0
NDRG family member 2 OS=Felis catus GN=NDRG2 PE=4 SV=1	tr|M3WLJ2|M3WLJ2_FELCA	43 kDa	0	10	0	0
RAB11B, member RAS oncogene family OS=Felis catus GN=RAB11B PE=4 SV=1	tr|M3WM66|M3WM66_FELCA (+1)	25 kDa	10	0	0	0
Paraoxonase 1 OS=Felis catus GN=PON1 PE=4 SV=1	tr|M3WNF1|M3WNF1_FELCA	40 kDa	0	10	0	0
Glutathione peroxidase OS=Felis catus GN=GPX5 PE=3 SV=1	tr|M3WSE2|M3WSE2_FELCA	25 kDa	10	0	0	0
DCN1-like protein OS=Felis catus GN=DCUN1D1 PE=4 SV=1	tr|M3WTK7|M3WTK7_FELCA	33 kDa	10	0	0	0
Kinesin-like protein OS=Felis catus GN=KIF5B PE=3 SV=1	tr|M3WU61|M3WU61_FELCA	110 kDa	0	0	0	11
Collagen type I alpha 2 chain OS=Felis catus GN=COL1A2 PE=4 SV=1	tr|M3WVN3|M3WVN3_FELCA	130 kDa	0	0	0	10
GTP-binding nuclear protein Ran OS=Felis catus GN=RAN PE=3 SV=1	tr|M3WXV4|M3WXV4_FELCA	23 kDa	10	0	0	0
Uncharacterized protein OS=Felis catus GN=HSPD1 PE=3 SV=1	tr|M3WXZ4|M3WXZ4_FELCA	61 kDa	0	0	10	0
Isochorismatase domain containing 1 OS=Felis catus GN=ISOC1 PE=4 SV=1	tr|M3X1J3|M3X1J3_FELCA	22 kDa	10	0	0	0
Betaine--homocysteine S-methyltransferase OS=Felis catus GN=BHMT PE=4 SV=1	tr|M3XCT4|M3XCT4_FELCA	45 kDa	0	10	0	0
Progesterone receptor membrane component 2 OS=Felis catus GN=PGRMC2 PE=3 SV=1	tr|M3XE48|M3XE48_FELCA	23 kDa	12	0	0	0
Uncharacterized protein OS=Felis catus PE=3 SV=1	tr|M3WMI6|M3WMI6_FELCA (+1)	14 kDa	3	0	2	2
Heat shock protein family B (small) member 6 OS=Felis catus GN=HSPB6 PE=3 SV=1	tr|M3W5U1|M3W5U1_FELCA	19 kDa	2	6	0	0
Neuroplastin OS=Felis catus GN=NPTN PE=4 SV=1	tr|M3W5R1|M3W5R1_FELCA	44 kDa	0	0	6	2
Tripartite motif containing 28 OS=Felis catus GN=TRIM28 PE=4 SV=1	tr|M3W0W7|M3W0W7_FELCA	76 kDa	0	0	3	4
Septin 9 OS=Felis catus GN=SEPT9 PE=3 SV=1	tr|M3WBC8|M3WBC8_FELCA	66 kDa	0	6	6	0
Adhesion regulating molecule 1 OS=Felis catus GN=ADRM1 PE=4 SV=1	tr|M3W008|M3W008_FELCA	42 kDa	5	4	0	0
DEAD-box helicase 1 OS=Felis catus GN=DDX1 PE=4 SV=1	tr|M3W2M4|M3W2M4_FELCA	84 kDa	0	0	0	8
Sorting nexin 2 OS=Felis catus GN=SNX2 PE=4 SV=1	tr|M3WP68|M3WP68_FELCA	56 kDa	8	0	0	0
NAD(P)(+)--arginine ADP-ribosyltransferase OS=Felis catus GN=ART4 PE=3 SV=1	tr|M3XDK8|M3XDK8_FELCA	38 kDa	0	0	8	0
Proteasome 26S subunit, non-ATPase 13 OS=Felis catus GN=PSMD13 PE=4 SV=1	tr|M3VYX6|M3VYX6_FELCA	43 kDa	0	7	0	0
Beta-1,4-galactosyltransferase 1 OS=Felis catus GN=B4GALT1 PE=4 SV=1	tr|M3WTX2|M3WTX2_FELCA	42 kDa	0	0	8	0
Trans-2,3-enoyl-CoA reductase OS=Felis catus GN=TECR PE=4 SV=1	tr|M3XAV9|M3XAV9_FELCA	40 kDa	8	0	0	0
Capping actin protein of muscle Z-line beta subunit OS=Felis catus GN=CAPZB PE=4 SV=1	tr|M3WA78|M3WA78_FELCA	34 kDa	8	0	0	0
Cell cycle and apoptosis regulator 2 OS=Felis catus GN=CCAR2 PE=4 SV=1	tr|M3W4H2|M3W4H2_FELCA	102 kDa	0	0	0	7
Pyrroline-5-carboxylate reductase OS=Felis catus GN=PYCR3 PE=3 SV=1	tr|M3VVW6|M3VVW6_FELCA	29 kDa	8	0	0	0
Ferritin light chain OS=Felis catus GN=FTL PE=2 SV=3	sp|Q2MHN1|FRIL_FELCA	20 kDa	8	0	0	0
Hydroxysteroid 17-beta dehydrogenase 6 OS=Felis catus GN=HSD17B6 PE=3 SV=1	tr|M3VVL6|M3VVL6_FELCA	36 kDa	9	0	0	0
Uncharacterized protein OS=Felis catus GN=PAFAH1B3 PE=4 SV=1	tr|M3W0M0|M3W0M0_FELCA	26 kDa	9	0	0	0
Nicastrin OS=Felis catus GN=NCSTN PE=4 SV=1	tr|M3W183|M3W183_FELCA	75 kDa	0	0	0	9
Lysosomal associated membrane protein 2 OS=Felis catus GN=LAMP2 PE=3 SV=1	tr|M3W2D0|M3W2D0_FELCA (+1)	45 kDa	0	0	0	9
Succinyl-CoA:3-ketoacid-coenzyme A transferase OS=Felis catus GN=OXCT1 PE=3 SV=1	tr|M3W3N3|M3W3N3_FELCA	57 kDa	0	0	9	0
Stromal cell derived factor 4 OS=Felis catus GN=SDF4 PE=4 SV=1	tr|M3W808|M3W808_FELCA	43 kDa	0	9	0	0
Casein kinase II subunit beta OS=Felis catus GN=CSNK2B PE=3 SV=1	tr|M3W831|M3W831_FELCA	25 kDa	9	0	0	0
Inositol polyphosphate-5-phosphatase A OS=Felis catus GN=INPP5A PE=4 SV=1	tr|M3WE58|M3WE58_FELCA	48 kDa	0	9	0	0
Acetyl-CoA acetyltransferase 1 OS=Felis catus GN=ACAT1 PE=3 SV=1	tr|M3WGX6|M3WGX6_FELCA	45 kDa	0	8	0	0
Cystathionine gamma-lyase OS=Felis catus GN=CTH PE=3 SV=1	tr|M3WGZ1|M3WGZ1_FELCA	45 kDa	0	9	0	0
Peptidylprolyl isomerase OS=Felis catus GN=FKBP7 PE=4 SV=1	tr|M3WH52|M3WH52_FELCA	27 kDa	9	0	0	0
ATPase H+ transporting V1 subunit H OS=Felis catus GN=ATP6V1H PE=4 SV=1	tr|M3WKN2|M3WKN2_FELCA	56 kDa	0	0	9	0
Proliferation-associated 2G4 OS=Felis catus GN=PA2G4 PE=4 SV=1	tr|M3WLH5|M3WLH5_FELCA	44 kDa	0	9	0	0
Chitinase domain containing 1 OS=Felis catus GN=CHID1 PE=4 SV=1	tr|M3WS14|M3WS14_FELCA	47 kDa	0	9	0	0
Uncharacterized protein OS=Felis catus PE=4 SV=1	tr|M3WSZ1|M3WSZ1_FELCA	24 kDa	10	0	0	0
Parkinsonism associated deglycase OS=Felis catus GN=PARK7 PE=4 SV=1	tr|M3WYR7|M3WYR7_FELCA	17 kDa	9	0	0	0
Adaptor related protein complex 1 gamma 1 subunit OS=Felis catus GN=AP1G1 PE=4 SV=1	tr|M3X1F8|M3X1F8_FELCA	94 kDa	0	0	0	9
Immunoglobulin superfamily containing leucine rich repeat OS=Felis catus GN=ISLR PE=4 SV=1	tr|M3X315|M3X315_FELCA	46 kDa	0	0	9	0
COP9 signalosome subunit 7A OS=Felis catus GN=COPS7A PE=4 SV=1	tr|M3XEA0|M3XEA0_FELCA	30 kDa	9	0	0	0
Uncharacterized protein OS=Felis catus GN=RAP1B PE=4 SV=1	tr|M3XEM4|M3XEM4_FELCA	21 kDa	9	0	0	0
Nipsnap homolog 3A OS=Felis catus GN=NIPSNAP3A PE=4 SV=1	tr|M3X7M3|M3X7M3_FELCA	28 kDa	9	0	0	0
40S ribosomal protein S26 OS=Felis catus GN=RPS26 PE=3 SV=1	tr|M3WJU8|M3WJU8_FELCA	13 kDa	3	2	2	0
Uncharacterized protein OS=Felis catus GN=RPS15A PE=3 SV=1	tr|M3WDL6|M3WDL6_FELCA	15 kDa	4	2	0	0
Heterogeneous nuclear ribonucleoprotein F OS=Felis catus GN=HNRNPF PE=4 SV=1	tr|M3XBR2|M3XBR2_FELCA	46 kDa	4	10	0	0
RAB10, member RAS oncogene family OS=Felis catus GN=RAB10 PE=4 SV=1	tr|M3X579|M3X579_FELCA	23 kDa	7	0	0	2
Uncharacterized protein OS=Felis catus PE=4 SV=1	tr|M3XG47|M3XG47_FELCA	21 kDa	0	2	0	5
Uncharacterized protein OS=Felis catus PE=4 SV=1	tr|M3XCT3|M3XCT3_FELCA	14 kDa	6	0	0	0
Uncharacterized protein OS=Felis catus GN=BST2 PE=4 SV=1	tr|M3VVU4|M3VVU4_FELCA	20 kDa	2	0	5	0
Transmembrane protein 43 OS=Felis catus GN=TMEM43 PE=4 SV=1	tr|M3VXF0|M3VXF0_FELCA	45 kDa	2	5	0	0
Eukaryotic translation elongation factor 1 delta OS=Felis catus GN=EEF1D PE=3 SV=1	tr|M3XFH0|M3XFH0_FELCA	70 kDa	4	4	0	0
Coatomer subunit gamma OS=Felis catus GN=COPG1 PE=3 SV=1	tr|M3VXV1|M3VXV1_FELCA	90 kDa	0	0	2	6
Phosphoinositide phospholipase C OS=Felis catus GN=PLCD1 PE=4 SV=1	tr|M3VY86|M3VY86_FELCA	87 kDa	0	0	3	5
N-acetylated alpha-linked acidic dipeptidase 2 OS=Felis catus GN=NAALAD2 PE=4 SV=1	tr|M3WYX6|M3WYX6_FELCA	83 kDa	0	0	0	9
Phosphoacetylglucosamine mutase OS=Felis catus GN=PGM3 PE=3 SV=1	tr|M3W4K3|M3W4K3_FELCA	60 kDa	0	0	6	0
Uncharacterized protein OS=Felis catus GN=CTSD PE=3 SV=1	tr|M3W8G3|M3W8G3_FELCA	43 kDa	0	6	0	0
SEC31 homolog A, COPII coat complex component OS=Felis catus GN=SEC31A PE=4 SV=1	tr|M3VWV4|M3VWV4_FELCA	133 kDa	0	0	0	8
Alpha-1,4 glucan phosphorylase OS=Felis catus GN=PYGL PE=3 SV=1	tr|M3VZ45|M3VZ45_FELCA	88 kDa	0	0	0	19
NSF attachment protein alpha OS=Felis catus GN=NAPA PE=4 SV=1	tr|M3W5E1|M3W5E1_FELCA	33 kDa	8	0	0	0
SEC24 homolog D, COPII coat complex component OS=Felis catus GN=SEC24D PE=4 SV=1	tr|M3W714|M3W714_FELCA	104 kDa	0	0	0	8
Proteasome subunit beta type OS=Felis catus GN=PSMB6 PE=3 SV=1	tr|M3W8U9|M3W8U9_FELCA	25 kDa	8	0	0	0
Eukaryotic translation initiation factor 4A3 OS=Felis catus GN=EIF4A3 PE=3 SV=1	tr|M3W982|M3W982_FELCA	41 kDa	0	11	0	0
Plastin 3 OS=Felis catus GN=PLS3 PE=4 SV=1	tr|M3WA30|M3WA30_FELCA	71 kDa	0	0	15	0
Adaptor related protein complex 1 mu 1 subunit OS=Felis catus GN=AP1M1 PE=3 SV=1	tr|M3WAM2|M3WAM2_FELCA	50 kDa	0	8	0	0
BCAS2, pre-mRNA processing factor OS=Felis catus GN=BCAS2 PE=4 SV=1	tr|M3WDE2|M3WDE2_FELCA	26 kDa	8	0	0	0
Alpha-1,4 glucan phosphorylase OS=Felis catus GN=PYGM PE=3 SV=1	tr|M3WGJ7|M3WGJ7_FELCA	97 kDa	0	0	0	28
Mesoderm development candidate 2 OS=Felis catus GN=MESDC2 PE=4 SV=1	tr|M3WJS8|M3WJS8_FELCA	25 kDa	8	0	0	0
Retinol dehydrogenase 11 (all-trans/9-cis/11-cis) OS=Felis catus GN=RDH11 PE=3 SV=1	tr|M3WK22|M3WK22_FELCA	35 kDa	8	0	0	0
Enoyl-CoA hydratase, short chain 1 OS=Felis catus GN=ECHS1 PE=3 SV=1	tr|M3WM59|M3WM59_FELCA	29 kDa	8	0	0	0
Chloride intracellular channel protein OS=Felis catus GN=CLIC1 PE=3 SV=1	tr|M3WNY6|M3WNY6_FELCA	27 kDa	9	0	0	0
DExH-box helicase 9 OS=Felis catus GN=DHX9 PE=4 SV=1	tr|M3WPI7|M3WPI7_FELCA	141 kDa	0	0	0	8
Asporin OS=Felis catus GN=ASPN PE=4 SV=1	tr|M3WWN6|M3WWN6_FELCA	42 kDa	0	8	0	0
Acetyl-CoA acyltransferase 2 OS=Felis catus GN=ACAA2 PE=3 SV=1	tr|M3WYD1|M3WYD1_FELCA	42 kDa	0	8	0	0
Hypoxanthine phosphoribosyltransferase 1 OS=Felis catus GN=HPRT1 PE=4 SV=1	tr|M3X1P4|M3X1P4_FELCA	25 kDa	8	0	0	0
Rho GDP dissociation inhibitor beta OS=Felis catus GN=ARHGDIB PE=4 SV=1	tr|M3X317|M3X317_FELCA	23 kDa	9	0	0	0
AHNAK nucleoprotein OS=Felis catus GN=AHNAK PE=4 SV=1	tr|M3X4Q9|M3X4Q9_FELCA	613 kDa	0	0	0	8
Aspartate aminotransferase OS=Felis catus GN=GOT1 PE=4 SV=1	tr|M3X6W4|M3X6W4_FELCA	45 kDa	0	8	0	0
SRP receptor beta subunit OS=Felis catus GN=SRPRB PE=4 SV=1	tr|M3X873|M3X873_FELCA	30 kDa	8	0	0	0
Triokinase and FMN cyclase OS=Felis catus GN=TKFC PE=4 SV=1	tr|M3X940|M3X940_FELCA	59 kDa	0	0	8	0
RAB, member of RAS oncogene family like 3 OS=Felis catus GN=RABL3 PE=4 SV=1	tr|M3XA72|M3XA72_FELCA	26 kDa	8	0	0	0
S-formylglutathione hydrolase OS=Felis catus GN=ESD PE=3 SV=1	tr|M3XAF3|M3XAF3_FELCA	32 kDa	8	0	0	0
Growth factor receptor bound protein 2 OS=Felis catus GN=GRB2 PE=4 SV=1	tr|M3XAW3|M3XAW3_FELCA	25 kDa	8	0	0	0
Heterogeneous nuclear ribonucleoprotein A2/B1 OS=Felis catus GN=HNRNPA2B1 PE=4 SV=1	tr|M3XCQ1|M3XCQ1_FELCA	37 kDa	8	0	0	0
Proteasome subunit beta type OS=Felis catus GN=PSMB2 PE=3 SV=1	tr|M3XCX1|M3XCX1_FELCA	23 kDa	8	0	0	0
Uncharacterized protein OS=Felis catus PE=4 SV=1	tr|M3XDA5|M3XDA5_FELCA	70 kDa	0	0	0	9
3'(2'), 5'-bisphosphate nucleotidase 1 OS=Felis catus GN=BPNT1 PE=4 SV=1	tr|M3XEI7|M3XEI7_FELCA	33 kDa	0	8	0	0
Tumor protein, translationally-controlled 1 OS=Felis catus GN=TPT1 PE=3 SV=1	tr|M3VXX1|M3VXX1_FELCA	20 kDa	8	0	0	0
Nipsnap homolog 2 OS=Felis catus GN=NIPSNAP2 PE=4 SV=1	tr|M3VZI3|M3VZI3_FELCA	31 kDa	8	0	0	0
Ectonucleoside triphosphate diphosphohydrolase 2 OS=Felis catus GN=ENTPD2 PE=3 SV=1	tr|M3VUP3|M3VUP3_FELCA	46 kDa	0	0	3	2
Carboxylic ester hydrolase OS=Felis catus GN=CES1 PE=3 SV=1	tr|M3WKH4|M3WKH4_FELCA	62 kDa	0	0	5	0
NSFL1 cofactor OS=Felis catus GN=NSFL1C PE=4 SV=1	tr|M3WHQ6|M3WHQ6_FELCA	37 kDa	2	4	0	0
Family with sequence similarity 129 member B OS=Felis catus GN=FAM129B PE=4 SV=1	tr|M3VWQ9|M3VWQ9_FELCA	84 kDa	0	0	5	3
Serine and arginine rich splicing factor 5 OS=Felis catus GN=SRSF5 PE=4 SV=1	tr|M3WAB9|M3WAB9_FELCA	31 kDa	7	3	0	0
Clathrin light chain OS=Felis catus GN=CLTA PE=3 SV=1	tr|M3WHJ6|M3WHJ6_FELCA	24 kDa	2	5	0	0
Uncharacterized protein OS=Felis catus PE=4 SV=1	tr|M3WQM7|M3WQM7_FELCA	12 kDa	0	5	0	2
Uncharacterized protein OS=Felis catus GN=CDC42 PE=3 SV=1	tr|M3W2Z2|M3W2Z2_FELCA	21 kDa	5	0	0	0
Lectin, mannose binding 2 OS=Felis catus GN=LMAN2 PE=4 SV=1	tr|M3XF94|M3XF94_FELCA	40 kDa	5	2	0	0
Mannosyl (alpha-1,3-)-glycoprotein beta-1,2-N-acetylglucosaminyltransferase OS=Felis catus GN=MGAT1 PE=4 SV=1	tr|M3WMF0|M3WMF0_FELCA	52 kDa	0	5	2	0
G protein subunit alpha i3 OS=Felis catus GN=GNAI3 PE=4 SV=1	tr|M3WPU1|M3WPU1_FELCA	41 kDa	5	13	0	0
Endoplasmic reticulum-golgi intermediate compartment 1 OS=Felis catus GN=ERGIC1 PE=4 SV=1	tr|M3WER9|M3WER9_FELCA	35 kDa	5	0	0	0
Espin OS=Felis catus GN=ESPN PE=4 SV=1	tr|M3XDX1|M3XDX1_FELCA	77 kDa	0	0	0	6
Lactotransferrin OS=Felis catus GN=LTF PE=3 SV=1	tr|M3WKU0|M3WKU0_FELCA	78 kDa	0	0	11	0
Integrin subunit alpha V OS=Felis catus GN=ITGAV PE=3 SV=1	tr|M3W4G7|M3W4G7_FELCA	111 kDa	0	0	0	6
G protein subunit alpha 11 OS=Felis catus GN=GNA11 PE=4 SV=1	tr|M3XDT0|M3XDT0_FELCA	36 kDa	0	10	0	0
Aldose 1-epimerase OS=Felis catus GN=GALM PE=3 SV=1	tr|M3WQR6|M3WQR6_FELCA	38 kDa	0	6	0	0
Hydroxysteroid 17-beta dehydrogenase 11 OS=Felis catus GN=HSD17B11 PE=3 SV=1	tr|M3X4D0|M3X4D0_FELCA	33 kDa	7	0	0	0
Complement C1q B chain OS=Felis catus GN=C1QB PE=4 SV=1	tr|M3VUY9|M3VUY9_FELCA	27 kDa	7	0	0	0
Nicotinamide N-methyltransferase OS=Felis catus GN=NNMT PE=4 SV=1	tr|M3VVS6|M3VVS6_FELCA	30 kDa	7	0	0	0
Alpha-N-acetylgalactosaminidase OS=Felis catus GN=NAGA PE=3 SV=1	tr|M3VWN7|M3VWN7_FELCA	47 kDa	0	7	0	0
Aldo-keto reductase family 1 member A1 OS=Felis catus GN=AKR1A1 PE=4 SV=1	tr|M3VZ98|M3VZ98_FELCA	37 kDa	0	7	0	0
Electron transfer flavoprotein beta subunit OS=Felis catus GN=ETFB PE=2 SV=1	tr|M3VZA6|M3VZA6_FELCA	28 kDa	7	0	0	0
Uncharacterized protein OS=Felis catus GN=RACK1 PE=4 SV=1	tr|M3VZL6|M3VZL6_FELCA	35 kDa	6	0	0	0
Uncharacterized protein OS=Felis catus GN=HNRNPL PE=4 SV=1	tr|M3VZV8|M3VZV8_FELCA	64 kDa	7	0	0	0
Phosphomannomutase OS=Felis catus GN=PMM2 PE=3 SV=1	tr|M3W1J4|M3W1J4_FELCA	28 kDa	7	0	0	0
NAD(P)H-hydrate epimerase OS=Felis catus GN=APOA1BP PE=3 SV=1	tr|M3W642|M3W642_FELCA	26 kDa	7	0	0	0
Uncharacterized protein OS=Felis catus PE=4 SV=1	tr|M3W8S9|M3W8S9_FELCA	46 kDa	0	7	0	0
Platelet-derived growth factor receptor alpha OS=Felis catus GN=PDGFRA PE=3 SV=1	tr|M3WAV8|M3WAV8_FELCA	123 kDa	0	0	0	7
Transducin beta like 2 OS=Felis catus GN=TBL2 PE=4 SV=1	tr|M3WHD4|M3WHD4_FELCA	50 kDa	0	7	0	0
Amine oxidase OS=Felis catus GN=MAOA PE=3 SV=1	tr|M3WI73|M3WI73_FELCA	60 kDa	0	0	7	0
Heme binding protein 1 OS=Felis catus GN=HEBP1 PE=4 SV=1	tr|M3WJW0|M3WJW0_FELCA	21 kDa	7	0	0	0
IlvB acetolactate synthase like OS=Felis catus GN=ILVBL PE=3 SV=1	tr|M3WL98|M3WL98_FELCA	68 kDa	0	0	7	0
ATP-dependent (S)-NAD(P)H-hydrate dehydratase OS=Felis catus GN=CARKD PE=3 SV=1	tr|M3WLC4|M3WLC4_FELCA	34 kDa	0	7	0	0
Complement C6 OS=Felis catus GN=C6 PE=4 SV=1	tr|M3WLH3|M3WLH3_FELCA	105 kDa	0	0	0	7
Armadillo repeat containing 10 OS=Felis catus GN=ARMC10 PE=4 SV=1	tr|M3WQI8|M3WQI8_FELCA	34 kDa	6	0	0	0
Uncharacterized protein OS=Felis catus PE=4 SV=1	tr|M3WQX9|M3WQX9_FELCA	10 kDa	0	0	0	7
Ubiquitin carboxyl-terminal hydrolase OS=Felis catus GN=UCHL3 PE=3 SV=1	tr|M3WRI6|M3WRI6_FELCA	26 kDa	7	0	0	0
Phosphatidylinositol glycan anchor biosynthesis class T OS=Felis catus GN=PIGT PE=4 SV=1	tr|M3WVG3|M3WVG3_FELCA	65 kDa	0	0	0	7
Alpha-(1,6)-fucosyltransferase OS=Felis catus GN=FUT8 PE=3 SV=1	tr|M3WXP3|M3WXP3_FELCA	67 kDa	0	0	7	0
Uncharacterized protein OS=Felis catus PE=4 SV=1	tr|M3WXQ0|M3WXQ0_FELCA	22 kDa	0	0	0	7
Uncharacterized protein OS=Felis catus GN=LOC101094108 PE=4 SV=1	tr|M3WXU2|M3WXU2_FELCA	30 kDa	7	0	0	0
Related RAS viral (r-ras) oncogene homolog OS=Felis catus GN=RRAS PE=4 SV=1	tr|M3X277|M3X277_FELCA	23 kDa	7	0	0	0
HECT and RLD domain containing E3 ubiquitin protein ligase 4 OS=Felis catus GN=HERC4 PE=4 SV=1	tr|M3X440|M3X440_FELCA	118 kDa	0	0	0	7
NAD(P)(+)--arginine ADP-ribosyltransferase OS=Felis catus GN=ART3 PE=3 SV=1	tr|M3X5Q8|M3X5Q8_FELCA	44 kDa	0	0	7	0
Uncharacterized protein OS=Felis catus PE=4 SV=1	tr|M3X5X6|M3X5X6_FELCA	30 kDa	0	0	0	7
STT3B, catalytic subunit of the oligosaccharyltransferase complex OS=Felis catus GN=STT3B PE=4 SV=1	tr|M3X7Z4|M3X7Z4_FELCA	83 kDa	0	7	0	0
Eukaryotic translation initiation factor 4A1 OS=Felis catus GN=EIF4A1 PE=3 SV=1	tr|M3XBC3|M3XBC3_FELCA	46 kDa	0	29	0	0
Programmed cell death 10 OS=Felis catus GN=PDCD10 PE=4 SV=1	tr|M3X960|M3X960_FELCA	25 kDa	7	0	0	0
Platelet activating factor acetylhydrolase 1b catalytic subunit 2 OS=Felis catus GN=PAFAH1B2 PE=4 SV=1	tr|M3XFC9|M3XFC9_FELCA	26 kDa	7	0	0	0
Uncharacterized protein OS=Felis catus PE=4 SV=1	tr|M3W235|M3W235_FELCA	39 kDa	0	0	0	7
Uncharacterized protein OS=Felis catus PE=3 SV=1	tr|M3VUN8|M3VUN8_FELCA	17 kDa	7	0	0	0
Protein S100 OS=Felis catus GN=S100A9 PE=3 SV=1	tr|M3VZX1|M3VZX1_FELCA	11 kDa	7	0	0	0
Uncharacterized protein OS=Felis catus PE=3 SV=1	tr|M3W119|M3W119_FELCA	50 kDa	0	0	25	28
Protein S100 OS=Felis catus GN=S100A11 PE=3 SV=1	tr|M3X1D4|M3X1D4_FELCA	11 kDa	4	0	0	0
Reticulon OS=Felis catus GN=RTN4 PE=4 SV=1	tr|M3X9G5|M3X9G5_FELCA	128 kDa	0	3	0	0
Protein kinase cAMP-dependent type I regulatory subunit alpha OS=Felis catus GN=PRKAR1A PE=4 SV=1	tr|M3WEB2|M3WEB2_FELCA	43 kDa	0	3	2	0
Uncharacterized protein OS=Felis catus PE=4 SV=1	tr|M3WFW0|M3WFW0_FELCA	44 kDa	0	2	3	0
Adducin 1 OS=Felis catus GN=ADD1 PE=4 SV=1	tr|M3XD22|M3XD22_FELCA	87 kDa	2	3	0	0
Aspartyl-tRNA synthetase OS=Felis catus GN=DARS PE=3 SV=1	tr|M3WKG0|M3WKG0_FELCA	53 kDa	0	0	3	3
Uncharacterized protein OS=Felis catus PE=4 SV=1	tr|M3X1N9|M3X1N9_FELCA	20 kDa	0	0	0	7
Methylthioribulose-1-phosphate dehydratase OS=Felis catus GN=APIP PE=3 SV=1	tr|M3VYQ9|M3VYQ9_FELCA	27 kDa	5	0	0	0
Tax_Id=9606 Gene_Symbol=KRT10 Keratin, type I cytoskeletal 10	IPI:CON_00009865.2|SWISS-PROT:P13645	60 kDa	7	0	0	0
Uncharacterized protein OS=Felis catus PE=4 SV=1	tr|M3WXH2|M3WXH2_FELCA	13 kDa	5	0	0	0
Uncharacterized protein OS=Felis catus PE=4 SV=1	tr|M3X1Z9|M3X1Z9_FELCA	13 kDa	0	0	0	7
Tubulin beta chain OS=Felis catus GN=TUBB6 PE=3 SV=1	tr|M3XFN3|M3XFN3_FELCA	50 kDa	0	24	0	0
IST1, ESCRT-III associated factor OS=Felis catus GN=IST1 PE=4 SV=1	tr|M3WQF1|M3WQF1_FELCA	40 kDa	6	0	0	0
VAMP associated protein A OS=Felis catus GN=VAPA PE=4 SV=1	tr|M3WR51|M3WR51_FELCA	24 kDa	5	0	0	0
Alpha-1-B glycoprotein OS=Felis catus GN=A1BG PE=4 SV=1	tr|M3W0W4|M3W0W4_FELCA	54 kDa	0	0	2	4
Uncharacterized protein OS=Felis catus GN=FCGR2B PE=4 SV=1	tr|M3W929|M3W929_FELCA	35 kDa	0	5	0	0
Dipeptidyl peptidase 7 OS=Felis catus GN=DPP7 PE=4 SV=1	tr|M3W989|M3W989_FELCA	57 kDa	0	0	5	0
BAI1 associated protein 2 OS=Felis catus GN=BAIAP2 PE=4 SV=1	tr|M3WF54|M3WF54_FELCA	59 kDa	5	0	0	0
Serine hydroxymethyltransferase OS=Felis catus GN=SHMT1 PE=3 SV=1	tr|M3WMK4|M3WMK4_FELCA	53 kDa	0	0	0	5
Uncharacterized protein OS=Felis catus GN=LOC101080954 PE=4 SV=1	tr|M3W9F0|M3W9F0_FELCA	84 kDa	0	0	0	5
Uncharacterized protein OS=Felis catus GN=LOC101084388 PE=3 SV=1	tr|M3WST5|M3WST5_FELCA (+1)	31 kDa	5	0	0	0
SEC62 homolog, preprotein translocation factor OS=Felis catus GN=SEC62 PE=4 SV=1	tr|M3WXK6|M3WXK6_FELCA	46 kDa	0	0	5	0
G protein subunit alpha 13 OS=Felis catus GN=GNA13 PE=4 SV=1	tr|M3X9G7|M3X9G7_FELCA	44 kDa	0	7	0	0
Elongator complex protein 3 OS=Felis catus GN=ELP3 PE=3 SV=1	tr|M3X6K4|M3X6K4_FELCA	62 kDa	0	0	4	0
ST6 N-acetylgalactosaminide alpha-2,6-sialyltransferase 2 OS=Felis catus GN=ST6GALNAC2 PE=3 SV=1	tr|M3WGA4|M3WGA4_FELCA	37 kDa	0	0	5	0
Cysteine and glycine rich protein 1 OS=Felis catus GN=CSRP1 PE=4 SV=1	tr|M3VUS1|M3VUS1_FELCA	21 kDa	6	0	0	0
Osteoglycin OS=Felis catus GN=OGN PE=4 SV=1	tr|M3VVG9|M3VVG9_FELCA	35 kDa	0	6	0	0
Myosin heavy chain 9 OS=Felis catus GN=MYH9 PE=3 SV=1	tr|M3VW11|M3VW11_FELCA	226 kDa	0	0	0	16
N-acetylneuraminate synthase OS=Felis catus GN=NANS PE=4 SV=1	tr|M3VW76|M3VW76_FELCA (+1)	40 kDa	0	6	0	0
N-acetylglucosamine-6-phosphate deacetylase OS=Felis catus GN=AMDHD2 PE=3 SV=1	tr|M3VXM4|M3VXM4_FELCA	44 kDa	0	6	0	0
N-myc downstream regulated 1 OS=Felis catus GN=NDRG1 PE=4 SV=1	tr|M3VZX9|M3VZX9_FELCA	42 kDa	0	6	0	0
Platelet-derived growth factor receptor beta OS=Felis catus GN=PDGFRB PE=3 SV=1	tr|M3W0P6|M3W0P6_FELCA	122 kDa	0	0	0	7
Uncharacterized protein OS=Felis catus PE=4 SV=1	tr|M3W1L8|M3W1L8_FELCA	35 kDa	0	0	0	6
Proteasome activator subunit 2 OS=Felis catus GN=PSME2 PE=4 SV=1	tr|M3W4B8|M3W4B8_FELCA	27 kDa	7	0	0	0
Uncharacterized protein OS=Felis catus PE=3 SV=1	tr|M3W704|M3W704_FELCA	35 kDa	6	0	0	0
Ribonuclease/angiogenin inhibitor 1 OS=Felis catus GN=RNH1 PE=4 SV=1	tr|M3W7Z5|M3W7Z5_FELCA	56 kDa	0	6	0	0
Peptidase D OS=Felis catus GN=PEPD PE=3 SV=1	tr|M3W8R0|M3W8R0_FELCA	54 kDa	0	0	6	0
Serpin family B member 1 OS=Felis catus GN=SERPINB1 PE=3 SV=1	tr|M3WA16|M3WA16_FELCA	43 kDa	0	6	0	0
Uncharacterized protein OS=Felis catus PE=4 SV=1	tr|M3WBE2|M3WBE2_FELCA	25 kDa	6	0	0	0
Intercellular adhesion molecule 1 OS=Felis catus GN=ICAM1 PE=4 SV=1	tr|M3WBF1|M3WBF1_FELCA	58 kDa	0	0	0	6
Uncharacterized protein OS=Felis catus GN=EIF4E PE=3 SV=1	tr|M3WCF3|M3WCF3_FELCA	25 kDa	6	0	0	0
Uncharacterized protein OS=Felis catus GN=HNRNPA1 PE=4 SV=1	tr|M3WCS4|M3WCS4_FELCA	39 kDa	6	0	0	0
TROVE domain family member 2 OS=Felis catus GN=TROVE2 PE=4 SV=1	tr|M3WCT3|M3WCT3_FELCA	61 kDa	0	0	6	0
BRO1 domain and CAAX motif containing OS=Felis catus GN=BROX PE=4 SV=1	tr|M3WLK2|M3WLK2_FELCA	46 kDa	0	6	0	0
Integrin beta OS=Felis catus GN=ITGB5 PE=3 SV=1	tr|M3WLX3|M3WLX3_FELCA	90 kDa	0	0	0	8
Hydroxypyruvate isomerase (putative) OS=Felis catus GN=HYI PE=4 SV=1	tr|M3WLZ2|M3WLZ2_FELCA	23 kDa	6	0	0	0
Ubiquitin specific peptidase 14 OS=Felis catus GN=USP14 PE=3 SV=1	tr|M3WN78|M3WN78_FELCA	56 kDa	0	0	6	0
Prolyl 4-hydroxylase subunit alpha 1 OS=Felis catus GN=P4HA1 PE=4 SV=1	tr|M3WPP5|M3WPP5_FELCA	61 kDa	0	0	6	0
Arginine demethylase and lysine hydroxylase OS=Felis catus GN=JMJD6 PE=4 SV=1	tr|M3WSH9|M3WSH9_FELCA	48 kDa	0	6	0	0
Pyrophosphatase (inorganic) 1 OS=Felis catus GN=PPA1 PE=4 SV=1	tr|M3WTQ9|M3WTQ9_FELCA	30 kDa	6	0	0	0
ER lipid raft associated 1 OS=Felis catus GN=ERLIN1 PE=4 SV=1	tr|M3WVS2|M3WVS2_FELCA	39 kDa	0	8	0	0
Pentaxin OS=Felis catus GN=CRP PE=3 SV=1	tr|M3WZ75|M3WZ75_FELCA	25 kDa	6	0	0	0
G protein subunit alpha q OS=Felis catus GN=GNAQ PE=4 SV=1	tr|M3X0R4|M3X0R4_FELCA	35 kDa	0	10	0	0
Uncharacterized protein OS=Felis catus PE=4 SV=1	tr|M3X5A5|M3X5A5_FELCA	14 kDa	6	0	0	0
Serine/threonine-protein phosphatase OS=Felis catus GN=PPP3CA PE=3 SV=1	tr|M3X780|M3X780_FELCA	58 kDa	0	0	6	0
Thioredoxin related transmembrane protein 3 OS=Felis catus GN=TMX3 PE=4 SV=1	tr|M3XB18|M3XB18_FELCA	52 kDa	0	0	7	0
Cysteine rich secretory protein 2 OS=Felis catus GN=CRISP2 PE=3 SV=1	tr|M3XFM3|M3XFM3_FELCA	27 kDa	14	0	0	0
10-formyltetrahydrofolate dehydrogenase OS=Felis catus GN=ALDH1L1 PE=3 SV=1	tr|M3VX94|M3VX94_FELCA	99 kDa	0	0	0	6
Uncharacterized protein OS=Felis catus PE=4 SV=1	tr|M3WVR8|M3WVR8_FELCA	42 kDa	0	0	0	6
Transmembrane protein 30A OS=Felis catus GN=TMEM30A PE=4 SV=1	tr|M3XDP7|M3XDP7_FELCA	44 kDa	0	0	6	0
Mitogen-activated protein kinase kinase 1 OS=Felis catus GN=MAP2K1 PE=3 SV=1	tr|M3X1X5|M3X1X5_FELCA	44 kDa	0	6	0	0
Hydroxysteroid 17-beta dehydrogenase 4 OS=Felis catus GN=HSD17B4 PE=4 SV=1	tr|M3W9K8|M3W9K8_FELCA	81 kDa	0	6	0	0
Flavin-containing monooxygenase OS=Felis catus GN=FMO5 PE=3 SV=1	tr|M3WI35|M3WI35_FELCA	60 kDa	0	0	8	0
Small nuclear ribonucleoprotein U1 subunit 70 OS=Felis catus GN=SNRNP70 PE=4 SV=1	tr|M3W6B8|M3W6B8_FELCA	52 kDa	7	0	0	0
Sodium/potassium-transporting ATPase subunit beta OS=Felis catus GN=ATP1B3 PE=3 SV=1	tr|M3WX58|M3WX58_FELCA	27 kDa	0	6	0	0
Uncharacterized protein OS=Felis catus GN=GOSR2 PE=3 SV=1	tr|M3WVH6|M3WVH6_FELCA	25 kDa	6	0	0	0
Nucleolar and coiled-body phosphoprotein 1 OS=Felis catus GN=NOLC1 PE=4 SV=1	tr|M3VWA0|M3VWA0_FELCA	74 kDa	2	0	0	0
Adenosylhomocysteinase OS=Felis catus GN=AHCYL1 PE=3 SV=1	tr|M3W3K3|M3W3K3_FELCA (+1)	59 kDa	0	0	4	2
Uncharacterized protein OS=Felis catus GN=RPL32 PE=4 SV=1	tr|M3WW95|M3WW95_FELCA	16 kDa	2	2	0	0
Caveolae associated protein 2 OS=Felis catus GN=CAVIN2 PE=4 SV=1	tr|M3XCQ8|M3XCQ8_FELCA	47 kDa	0	3	0	0
Uncharacterized protein OS=Felis catus PE=4 SV=1	tr|M3WR28|M3WR28_FELCA	53 kDa	0	2	0	0
Phospholipid scramblase OS=Felis catus GN=PLSCR4 PE=3 SV=1	tr|M3W0S6|M3W0S6_FELCA	37 kDa	3	2	0	0
Uncharacterized protein OS=Felis catus GN=CAMK2D PE=3 SV=1	tr|M3WNF0|M3WNF0_FELCA	56 kDa	0	2	0	2
Complement factor I OS=Felis catus GN=CFI PE=3 SV=1	tr|M3VU42|M3VU42_FELCA	66 kDa	0	3	2	0
Coronin OS=Felis catus GN=CORO1A PE=3 SV=1	tr|M3VWE3|M3VWE3_FELCA	51 kDa	0	3	2	0
Obg-like ATPase 1 OS=Felis catus GN=OLA1 PE=3 SV=1	tr|M3XDU4|M3XDU4_FELCA	45 kDa	0	3	0	0
Uncharacterized protein OS=Felis catus PE=4 SV=1	tr|M3WLF2|M3WLF2_FELCA	17 kDa	0	4	0	0
Tubulin beta chain OS=Felis catus GN=TUBB4A PE=3 SV=1	tr|M3WCZ3|M3WCZ3_FELCA	41 kDa	0	0	42	0
WD repeat domain 1 OS=Felis catus GN=WDR1 PE=4 SV=1	tr|M3WEW2|M3WEW2_FELCA	66 kDa	0	0	4	0
Potassium channel tetramerization domain containing 12 OS=Felis catus GN=KCTD12 PE=4 SV=1	tr|M3WWC3|M3WWC3_FELCA	33 kDa	0	4	0	0
Heterogeneous nuclear ribonucleoprotein D OS=Felis catus GN=HNRNPD PE=4 SV=1	tr|M3X0J4|M3X0J4_FELCA	40 kDa	0	4	0	0
Transmembrane protein 119 OS=Felis catus GN=TMEM119 PE=4 SV=1	tr|M3WJZ5|M3WJZ5_FELCA	24 kDa	0	0	3	0
ATPase H+ transporting V1 subunit A OS=Felis catus GN=ATP6V1A PE=3 SV=1	tr|M3X6U5|M3X6U5_FELCA	68 kDa	0	0	4	0
Uncharacterized protein OS=Felis catus PE=4 SV=1	tr|M3X050|M3X050_FELCA	12 kDa	4	0	0	0
CD38 molecule OS=Felis catus GN=CD38 PE=4 SV=1	tr|M3WEJ2|M3WEJ2_FELCA	29 kDa	0	0	5	0
Serpin family F member 2 OS=Felis catus GN=SERPINF2 PE=3 SV=1	tr|M3W5N0|M3W5N0_FELCA	55 kDa	0	0	4	0
AP-3 complex subunit beta OS=Felis catus GN=AP3B2 PE=3 SV=1	tr|M3WPN1|M3WPN1_FELCA	113 kDa	0	0	0	7
Perilipin OS=Felis catus GN=PLIN3 PE=3 SV=1	tr|M3WCR9|M3WCR9_FELCA	47 kDa	3	0	0	0
Proteasome 26S subunit, non-ATPase 4 OS=Felis catus GN=PSMD4 PE=4 SV=1	tr|M3W4A2|M3W4A2_FELCA	41 kDa	0	0	4	0
Ubiquitin thioesterase OS=Felis catus GN=OTUB1 PE=3 SV=1	tr|M3XBE5|M3XBE5_FELCA	32 kDa	4	0	0	0
Nucleophosmin OS=Felis catus GN=NPM1 PE=4 SV=1	tr|M3X673|M3X673_FELCA	34 kDa	4	0	0	0
Nucleosome assembly protein 1 like 1 OS=Felis catus GN=NAP1L1 PE=3 SV=1	tr|M3VUF4|M3VUF4_FELCA	45 kDa	0	0	8	0
NEDD8-activating enzyme E1 regulatory subunit OS=Felis catus GN=NAE1 PE=3 SV=1	tr|M3WHK1|M3WHK1_FELCA	60 kDa	0	0	4	0
Uncharacterized protein OS=Felis catus PE=4 SV=1	tr|M3X7B7|M3X7B7_FELCA	15 kDa	4	0	0	0
Uncharacterized protein OS=Felis catus PE=3 SV=1	tr|M3WMZ6|M3WMZ6_FELCA	49 kDa	0	0	4	0
Tax_Id=9606 Gene_Symbol=KRT2 Keratin, type II cytoskeletal 2 epidermal	IPI:CON_00021304.1|SWISS-PROT:P35908	66 kDa	5	0	0	0
Sec23 homolog A, coat complex II component OS=Felis catus GN=SEC23A PE=4 SV=1	tr|M3WPR4|M3WPR4_FELCA	86 kDa	0	0	3	0
ST3 beta-galactoside alpha-2,3-sialyltransferase 1 OS=Felis catus GN=ST3GAL1 PE=3 SV=1	tr|M3X6X4|M3X6X4_FELCA	39 kDa	0	0	4	0
Syntaxin binding protein 3 OS=Felis catus GN=STXBP3 PE=3 SV=1	tr|M3WQB8|M3WQB8_FELCA	68 kDa	0	0	4	0
CTR9 homolog, Paf1/RNA polymerase II complex component OS=Felis catus GN=CTR9 PE=4 SV=1	tr|M3VUP9|M3VUP9_FELCA	133 kDa	0	0	0	3
Uncharacterized protein OS=Felis catus GN=LOC101081363 PE=4 SV=1	tr|M3W5L9|M3W5L9_FELCA	71 kDa	0	0	0	4
Integrin beta OS=Felis catus GN=ITGB3 PE=3 SV=1	tr|M3W149|M3W149_FELCA	86 kDa	0	0	0	4
ALG2, alpha-1,3/1,6-mannosyltransferase OS=Felis catus GN=ALG2 PE=4 SV=1	tr|M3X7Q7|M3X7Q7_FELCA	47 kDa	0	4	0	0
Ribosomal protein S13 OS=Felis catus GN=RPS13 PE=3 SV=1	tr|M3W3Y8|M3W3Y8_FELCA (+1)	17 kDa	4	0	0	0
Beta-hexosaminidase OS=Felis catus GN=HEXA PE=2 SV=1	tr|G4XSV9|G4XSV9_FELCA	61 kDa	0	0	5	0
Family with sequence similarity 98 member B OS=Felis catus GN=FAM98B PE=4 SV=1	tr|M3VTY4|M3VTY4_FELCA	45 kDa	0	5	0	0
Complement C1q C chain OS=Felis catus GN=C1QC PE=4 SV=1	tr|M3VUY8|M3VUY8_FELCA	22 kDa	5	0	0	0
Proteasome 26S subunit, non-ATPase 8 OS=Felis catus GN=PSMD8 PE=4 SV=1	tr|M3VVH1|M3VVH1_FELCA (+1)	39 kDa	5	0	0	0
Syntaxin binding protein 1 OS=Felis catus GN=STXBP1 PE=3 SV=1	tr|M3VWR0|M3VWR0_FELCA	68 kDa	0	0	5	0
Lipase OS=Felis catus GN=LIPA PE=3 SV=1	tr|M3VXL3|M3VXL3_FELCA	46 kDa	0	6	0	0
Dynactin subunit 3 OS=Felis catus GN=DCTN3 PE=4 SV=1	tr|M3VZT7|M3VZT7_FELCA	22 kDa	5	0	0	0
Glutathione peroxidase OS=Felis catus GN=GPX6 PE=3 SV=1	tr|M3W083|M3W083_FELCA	25 kDa	6	0	0	0
CD44 molecule (Indian blood group) OS=Felis catus GN=CD44 PE=4 SV=1	tr|M3W4X0|M3W4X0_FELCA	81 kDa	0	0	0	5
Dihydrolipoamide S-succinyltransferase OS=Felis catus GN=DLST PE=4 SV=1	tr|M3W5T1|M3W5T1_FELCA	49 kDa	0	0	5	0
MICOS complex subunit OS=Felis catus GN=CHCHD3 PE=3 SV=1	tr|M3W6T8|M3W6T8_FELCA	26 kDa	5	0	0	0
Solute carrier family 25 member 1 OS=Felis catus GN=SLC25A1 PE=3 SV=1	tr|M3WBM2|M3WBM2_FELCA	36 kDa	5	0	0	0
Uncharacterized protein OS=Felis catus GN=LOC101080269 PE=4 SV=1	tr|M3WDI0|M3WDI0_FELCA	46 kDa	6	0	0	0
Tropomodulin 3 OS=Felis catus GN=TMOD3 PE=4 SV=1	tr|M3WH67|M3WH67_FELCA	40 kDa	0	6	0	0
Proteasome subunit beta type OS=Felis catus GN=PSMB3 PE=3 SV=1	tr|M3WKT6|M3WKT6_FELCA	23 kDa	5	0	0	0
Farnesyl-diphosphate farnesyltransferase 1 OS=Felis catus GN=FDFT1 PE=4 SV=1	tr|M3WLT9|M3WLT9_FELCA	44 kDa	0	5	0	0
Galactosidase alpha OS=Felis catus GN=GLA PE=3 SV=1	tr|M3WMI7|M3WMI7_FELCA	48 kDa	0	5	0	0
Uncharacterized protein OS=Felis catus PE=4 SV=1	tr|M3WTZ6|M3WTZ6_FELCA	23 kDa	0	0	0	6
Eukaryotic translation initiation factor 3 subunit K OS=Felis catus GN=EIF3K PE=3 SV=1	tr|M3WUN8|M3WUN8_FELCA	25 kDa	5	0	0	0
Phosphoglycerate mutase OS=Felis catus GN=PGAM2 PE=3 SV=1	tr|M3WYZ8|M3WYZ8_FELCA	29 kDa	15	0	0	0
Osteoclast stimulating factor 1 OS=Felis catus GN=OSTF1 PE=4 SV=1	tr|M3WZ14|M3WZ14_FELCA	23 kDa	5	0	0	0
Glycosyltransferase 8 domain containing 2 OS=Felis catus GN=GLT8D2 PE=4 SV=1	tr|M3X085|M3X085_FELCA	40 kDa	0	5	0	0
Isoamyl acetate-hydrolyzing esterase 1 homolog OS=Felis catus GN=IAH1 PE=4 SV=1	tr|M3X0X4|M3X0X4_FELCA	28 kDa	6	0	0	0
NPC intracellular cholesterol transporter 2 OS=Felis catus GN=NPC2 PE=4 SV=1	tr|M3X1L5|M3X1L5_FELCA	16 kDa	5	0	0	0
Protein phosphatase, Mg2+/Mn2+ dependent 1A OS=Felis catus GN=PPM1A PE=3 SV=1	tr|M3X268|M3X268_FELCA	43 kDa	0	5	0	0
Uncharacterized protein OS=Felis catus PE=4 SV=1	tr|M3X2U0|M3X2U0_FELCA	22 kDa	0	0	0	5
Penta-EF-hand domain containing 1 OS=Felis catus GN=PEF1 PE=4 SV=1	tr|M3X8H7|M3X8H7_FELCA	30 kDa	5	0	0	0
Dephospho-CoA kinase domain containing OS=Felis catus GN=DCAKD PE=3 SV=1	tr|M3XDQ3|M3XDQ3_FELCA	26 kDa	5	0	0	0
Cysteine rich with EGF like domains 1 OS=Felis catus GN=CRELD1 PE=4 SV=1	tr|M3XDZ1|M3XDZ1_FELCA	45 kDa	0	5	0	0
DnaJ heat shock protein family (Hsp40) member A4 OS=Felis catus GN=DNAJA4 PE=4 SV=1	tr|M3XFD2|M3XFD2_FELCA	40 kDa	0	6	0	0
A-kinase anchoring protein 12 OS=Felis catus GN=AKAP12 PE=4 SV=1	tr|M3XG39|M3XG39_FELCA	180 kDa	0	0	0	5
Kynurenine aminotransferase 3 OS=Felis catus GN=KYAT3 PE=4 SV=1	tr|M3W8I7|M3W8I7_FELCA	51 kDa	0	5	0	0
Aldehyde dehydrogenase 1 family member A2 OS=Felis catus GN=ALDH1A2 PE=3 SV=1	tr|M3WUR3|M3WUR3_FELCA	44 kDa	0	0	11	0
Sorcin OS=Felis catus GN=SRI PE=4 SV=1	tr|M3WWY9|M3WWY9_FELCA	22 kDa	5	0	0	0
Lin-7 homolog C, crumbs cell polarity complex component OS=Felis catus GN=LIN7C PE=4 SV=1	tr|M3WYC4|M3WYC4_FELCA	22 kDa	5	0	0	0
Uncharacterized protein OS=Felis catus PE=3 SV=1	tr|M3W2V0|M3W2V0_FELCA	21 kDa	5	0	0	0
DnaJ heat shock protein family (Hsp40) member B6 OS=Felis catus GN=DNAJB6 PE=4 SV=1	tr|M3WN05|M3WN05_FELCA	36 kDa	5	0	0	0
Glypican 1 OS=Felis catus GN=GPC1 PE=3 SV=1	tr|M3X0U1|M3X0U1_FELCA	55 kDa	0	0	0	5
KIAA2013 OS=Felis catus GN=KIAA2013 PE=4 SV=1	tr|M3X4E2|M3X4E2_FELCA	59 kDa	0	0	5	0
Catenin beta 1 OS=Felis catus GN=CTNNB1 PE=4 SV=1	tr|M3W0E4|M3W0E4_FELCA	85 kDa	0	0	5	0
Matrix metalloproteinase OS=Felis catus GN=MMP14 PE=3 SV=1	tr|M3W681|M3W681_FELCA	66 kDa	0	0	5	0
Histamine N-methyltransferase OS=Felis catus GN=HNMT PE=4 SV=1	tr|M3WWQ6|M3WWQ6_FELCA	34 kDa	5	0	0	0
Aminoadipate-semialdehyde synthase OS=Felis catus GN=AASS PE=4 SV=1	tr|M3WZB2|M3WZB2_FELCA	103 kDa	0	0	0	5
Promyelocytic leukemia OS=Felis catus GN=PML PE=4 SV=1	tr|M3VZQ0|M3VZQ0_FELCA	97 kDa	0	0	0	5
Pyruvate dehydrogenase E1 component subunit alpha OS=Felis catus GN=PDHA1 PE=4 SV=1	tr|M3WHU7|M3WHU7_FELCA	43 kDa	0	5	0	0
Uncharacterized protein OS=Felis catus PE=3 SV=1	tr|M3WX06|M3WX06_FELCA	41 kDa	0	13	0	0
Protein kinase C and casein kinase substrate in neurons 2 OS=Felis catus GN=PACSIN2 PE=4 SV=1	tr|M3WCP1|M3WCP1_FELCA	54 kDa	0	5	0	0
Protein kinase C substrate 80K-H OS=Felis catus GN=PRKCSH PE=4 SV=1	tr|M3W340|M3W340_FELCA (+1)	59 kDa	0	0	0	5
Proteasome subunit alpha type OS=Felis catus GN=PSMA8 PE=3 SV=1	tr|M3XET1|M3XET1_FELCA	28 kDa	13	0	0	0
Adenylate kinase 4, mitochondrial OS=Felis catus GN=AK4 PE=3 SV=1	tr|M3WZQ9|M3WZQ9_FELCA	25 kDa	5	0	0	0
LDL receptor related protein 1 OS=Felis catus GN=LRP1 PE=4 SV=1	tr|M3VU91|M3VU91_FELCA (+1)	505 kDa	0	0	0	5
Transmembrane 9 superfamily member OS=Felis catus GN=TM9SF3 PE=3 SV=1	tr|M3WVF3|M3WVF3_FELCA	64 kDa	0	0	0	4
Mannosyl (alpha-1,6-)-glycoprotein beta-1,2-N-acetylglucosaminyltransferase OS=Felis catus GN=MGAT2 PE=4 SV=1	tr|M3XAB6|M3XAB6_FELCA	51 kDa	0	0	5	0
ERGIC and golgi 3 OS=Felis catus GN=ERGIC3 PE=4 SV=1	tr|M3VZZ0|M3VZZ0_FELCA	45 kDa	0	5	0	0
Ankyrin repeat and FYVE domain containing 1 OS=Felis catus GN=ANKFY1 PE=4 SV=1	tr|M3VY70|M3VY70_FELCA	130 kDa	0	0	0	5
Sec23 homolog B, coat complex II component OS=Felis catus GN=SEC23B PE=4 SV=1	tr|M3WJJ8|M3WJJ8_FELCA	86 kDa	0	0	0	6
Uncharacterized protein OS=Felis catus GN=RNASE12 PE=3 SV=1	tr|M3X5I9|M3X5I9_FELCA	17 kDa	5	0	0	0
Uncharacterized protein OS=Felis catus PE=4 SV=1	tr|M3WRH4|M3WRH4_FELCA	37 kDa	0	6	0	0
Translocon-associated protein subunit beta OS=Felis catus GN=SSR2 PE=3 SV=1	tr|M3W5W2|M3W5W2_FELCA	20 kDa	5	0	0	0
Myosin light chain 6 OS=Felis catus GN=MYL6 PE=4 SV=1	tr|M3WLI0|M3WLI0_FELCA	17 kDa	0	0	0	2
Uncharacterized protein OS=Felis catus PE=4 SV=1	tr|M3WR32|M3WR32_FELCA	13 kDa	0	0	9	0
Uncharacterized protein OS=Felis catus GN=ISG15 PE=4 SV=1	tr|M3WNM9|M3WNM9_FELCA	17 kDa	0	0	0	2
Transmembrane p24 trafficking protein 10 OS=Felis catus GN=TMED10 PE=3 SV=1	tr|M3VWQ5|M3VWQ5_FELCA	24 kDa	2	0	0	2
Uncharacterized protein OS=Felis catus PE=4 SV=1	tr|M3XE86|M3XE86_FELCA	27 kDa	0	7	0	3
Joining chain of multimeric IgA and IgM OS=Felis catus GN=JCHAIN PE=4 SV=1	tr|M3XBL5|M3XBL5_FELCA	18 kDa	2	0	0	2
Coactosin like F-actin binding protein 1 OS=Felis catus GN=COTL1 PE=4 SV=1	tr|M3WE05|M3WE05_FELCA	16 kDa	2	0	0	0
Tubulin beta chain OS=Felis catus GN=TUBB2A PE=3 SV=1	tr|M3WL15|M3WL15_FELCA	50 kDa	0	0	0	52
Tubulin beta chain OS=Felis catus PE=3 SV=1	tr|M3W868|M3W868_FELCA	49 kDa	0	0	32	0
Poly(rC) binding protein 2 OS=Felis catus GN=PCBP2 PE=4 SV=1	tr|M3XAZ8|M3XAZ8_FELCA	35 kDa	8	0	0	0
Proline rich coiled-coil 1 OS=Felis catus GN=PRRC1 PE=4 SV=1	tr|M3WXU0|M3WXU0_FELCA	46 kDa	3	0	0	0
Peroxiredoxin 2 OS=Felis catus GN=PRDX2 PE=4 SV=1	tr|M3VUU2|M3VUU2_FELCA	22 kDa	4	0	0	0
Tubulin alpha chain OS=Felis catus GN=LOC101090556 PE=3 SV=1	tr|M3WER4|M3WER4_FELCA	50 kDa	0	0	35	0
Propionyl-CoA carboxylase beta subunit OS=Felis catus GN=PCCB PE=4 SV=1	tr|M3WD59|M3WD59_FELCA	59 kDa	0	0	2	0
Tumor protein D52 like 2 OS=Felis catus GN=TPD52L2 PE=4 SV=1	tr|M3VW51|M3VW51_FELCA	25 kDa	2	2	0	0
Calcium-transporting ATPase OS=Felis catus GN=ATP2B4 PE=3 SV=1	tr|M3VVK0|M3VVK0_FELCA (+2)	134 kDa	0	0	0	3
Uncharacterized protein OS=Felis catus PE=4 SV=1	tr|M3W5Z5|M3W5Z5_FELCA	52 kDa	0	3	0	0
Tyrosine-protein kinase OS=Felis catus GN=YES1 PE=3 SV=1	tr|M3WB17|M3WB17_FELCA	61 kDa	0	0	6	0
Uncharacterized protein OS=Felis catus PE=4 SV=1	tr|M3XBH6|M3XBH6_FELCA	53 kDa	0	3	0	0
Synaptotagmin binding cytoplasmic RNA interacting protein OS=Felis catus GN=SYNCRIP PE=4 SV=1	tr|M3WUF3|M3WUF3_FELCA (+1)	70 kDa	0	3	0	0
Glycylpeptide N-tetradecanoyltransferase OS=Felis catus GN=NMT1 PE=3 SV=1	tr|M3W445|M3W445_FELCA	57 kDa	0	0	3	0
Pyruvate kinase OS=Felis catus GN=PKM PE=3 SV=1	tr|M3WRG5|M3WRG5_FELCA	58 kDa	0	0	51	0
Trafficking protein particle complex 12 OS=Felis catus GN=TRAPPC12 PE=4 SV=1	tr|M3WYP7|M3WYP7_FELCA	85 kDa	0	3	0	0
FACT complex subunit SSRP1 OS=Felis catus GN=SSRP1 PE=3 SV=1	tr|M3WEX8|M3WEX8_FELCA	81 kDa	0	0	3	0
Adaptor related protein complex 3 delta 1 subunit OS=Felis catus GN=AP3D1 PE=4 SV=1	tr|M3WGB6|M3WGB6_FELCA	135 kDa	0	0	0	3
Titin OS=Felis catus GN=TTN PE=4 SV=1	REV_tr|M3WG03|M3WG03_FELCA	3715 kDa	0	0	5	0
Ribosomal protein L9 OS=Felis catus GN=RPL9 PE=4 SV=1	tr|M3WGN1|M3WGN1_FELCA	22 kDa	3	0	0	0
Heat shock protein family H (Hsp110) member 1 OS=Felis catus GN=HSPH1 PE=3 SV=1	tr|M3W7W7|M3W7W7_FELCA	93 kDa	0	0	0	8
Sterol carrier protein 2 OS=Felis catus GN=SCP2 PE=3 SV=1	tr|M3WW41|M3WW41_FELCA	45 kDa	0	3	0	0
Serine/threonine-protein phosphatase OS=Felis catus GN=PPP2CA PE=3 SV=1	tr|M3X381|M3X381_FELCA	36 kDa	0	3	0	0
Lysine--tRNA ligase OS=Felis catus GN=KARS PE=3 SV=1	tr|M3W9U6|M3W9U6_FELCA	68 kDa	0	0	3	0
Glycerol-3-phosphate dehydrogenase [NAD(+)] OS=Felis catus GN=GPD1 PE=3 SV=1	tr|M3WBH7|M3WBH7_FELCA	38 kDa	0	3	0	0
Hydroxysteroid 17-beta dehydrogenase 10 OS=Felis catus GN=HSD17B10 PE=3 SV=1	tr|M3WJP6|M3WJP6_FELCA	27 kDa	3	0	0	0
Catenin delta 1 OS=Felis catus GN=CTNND1 PE=4 SV=1	tr|M3W695|M3W695_FELCA	104 kDa	0	0	0	3
Cadherin 1 OS=Felis catus GN=CDH1 PE=4 SV=1	tr|M3WJX8|M3WJX8_FELCA	98 kDa	0	0	0	2
Serpin family B member 9 OS=Felis catus GN=SERPINB9 PE=3 SV=1	tr|M3VVF8|M3VVF8_FELCA	43 kDa	0	5	0	0
Syntaxin binding protein 2 OS=Felis catus GN=STXBP2 PE=3 SV=1	tr|M3VWX8|M3VWX8_FELCA	66 kDa	0	0	4	0
Catechol-O-methyltransferase OS=Felis catus GN=COMT PE=4 SV=1	tr|M3VYY7|M3VYY7_FELCA	30 kDa	4	0	0	0
Complement C8 beta chain OS=Felis catus GN=C8B PE=4 SV=1	tr|M3W159|M3W159_FELCA	67 kDa	0	0	4	0
Dihydrolipoyl dehydrogenase OS=Felis catus GN=DLD PE=3 SV=1	tr|M3W291|M3W291_FELCA	54 kDa	0	0	4	0
Solute carrier family 44 member 2 OS=Felis catus GN=SLC44A2 PE=3 SV=1	tr|M3W313|M3W313_FELCA	80 kDa	0	0	0	5
SEL1L ERAD E3 ligase adaptor subunit OS=Felis catus GN=SEL1L PE=4 SV=1	tr|M3WAN5|M3WAN5_FELCA	89 kDa	0	0	0	4
Ornithine aminotransferase OS=Felis catus GN=OAT PE=3 SV=1	tr|M3WJK8|M3WJK8_FELCA	48 kDa	0	4	0	0
Transgelin OS=Felis catus GN=TAGLN2 PE=3 SV=1	tr|M3WNB7|M3WNB7_FELCA	22 kDa	4	0	0	0
Parvin alpha OS=Felis catus GN=PARVA PE=4 SV=1	tr|M3WQH4|M3WQH4_FELCA	39 kDa	0	4	0	0
RAB7A, member RAS oncogene family OS=Felis catus GN=RAB7A PE=4 SV=1	tr|M3WRD9|M3WRD9_FELCA	23 kDa	5	0	0	0
RAB14, member RAS oncogene family OS=Felis catus GN=RAB14 PE=4 SV=1	tr|M3WTD7|M3WTD7_FELCA	24 kDa	5	0	0	0
Aldehyde dehydrogenase OS=Felis catus GN=ALDH3B1 PE=3 SV=1	tr|M3WUQ7|M3WUQ7_FELCA	52 kDa	0	0	6	0
Solute carrier family 25 member 11 OS=Felis catus GN=SLC25A11 PE=3 SV=1	tr|M3WWX6|M3WWX6_FELCA	34 kDa	4	0	0	0
Inositol-1-monophosphatase OS=Felis catus GN=IMPA1 PE=3 SV=1	tr|M3X590|M3X590_FELCA	30 kDa	4	0	0	0
COP9 signalosome subunit 3 OS=Felis catus GN=COPS3 PE=4 SV=1	tr|M3X663|M3X663_FELCA	48 kDa	0	4	0	0
Uncharacterized protein OS=Felis catus PE=4 SV=1	tr|M3X7F9|M3X7F9_FELCA	26 kDa	0	0	4	0
Uncharacterized protein OS=Felis catus PE=4 SV=1	tr|M3XED7|M3XED7_FELCA	62 kDa	0	0	0	4
Adaptor related protein complex 1 mu 2 subunit OS=Felis catus GN=AP1M2 PE=3 SV=1	tr|M3W1V5|M3W1V5_FELCA	47 kDa	0	7	0	0
Nudix hydrolase 21 OS=Felis catus GN=NUDT21 PE=4 SV=1	tr|M3WA00|M3WA00_FELCA	26 kDa	4	0	0	0
Fumarylacetoacetate hydrolase OS=Felis catus GN=FAH PE=4 SV=1	tr|M3WHW7|M3WHW7_FELCA	38 kDa	0	4	0	0
Uncharacterized protein OS=Felis catus GN=NT5C2 PE=4 SV=1	tr|M3WJC3|M3WJC3_FELCA	58 kDa	0	0	4	0
Uncharacterized protein OS=Felis catus GN=LAMP1 PE=3 SV=1	tr|M3WKD0|M3WKD0_FELCA	45 kDa	0	0	0	4
GID complex subunit 8 homolog OS=Felis catus GN=GID8 PE=4 SV=1	tr|M3WMW2|M3WMW2_FELCA	27 kDa	4	0	0	0
Exocyst complex component 1 OS=Felis catus GN=EXOC1 PE=4 SV=1	tr|M3WPI1|M3WPI1_FELCA	102 kDa	0	0	0	4
Hemoglobin subunit alpha OS=Felis catus GN=HBA PE=1 SV=1	sp|P07405|HBA_FELCA (+1)	15 kDa	4	0	0	0
Uncharacterized protein OS=Felis catus PE=4 SV=1	tr|M3VY77|M3VY77_FELCA	21 kDa	4	0	0	0
RNA polymerase II subunit E OS=Felis catus GN=POLR2E PE=4 SV=1	tr|M3W7I2|M3W7I2_FELCA	22 kDa	4	0	0	0
Mitogen-activated protein kinase OS=Felis catus GN=MAPK1 PE=3 SV=1	tr|M3XFY0|M3XFY0_FELCA	41 kDa	0	9	0	0
Vacuolar-sorting protein SNF8 OS=Felis catus GN=SNF8 PE=3 SV=1	tr|M3WAI0|M3WAI0_FELCA	29 kDa	4	0	0	0
GLI pathogenesis related 1 like 1 OS=Felis catus GN=GLIPR1L1 PE=3 SV=1	tr|M3WLU8|M3WLU8_FELCA	27 kDa	4	0	0	0
Aspartate aminotransferase OS=Felis catus GN=GOT2 PE=4 SV=1	tr|M3XE42|M3XE42_FELCA	48 kDa	0	4	0	0
Protein phosphatase 1 regulatory subunit 7 OS=Felis catus GN=PPP1R7 PE=4 SV=1	tr|M3WDA6|M3WDA6_FELCA	41 kDa	0	4	0	0
Fibrinogen gamma chain OS=Felis catus GN=FGG PE=4 SV=1	tr|M3WN28|M3WN28_FELCA	49 kDa	0	0	0	4
Voltage dependent anion channel 3 OS=Felis catus GN=VDAC3 PE=4 SV=1	tr|M3WCM7|M3WCM7_FELCA	31 kDa	5	0	0	0
Nucleobindin 1 OS=Felis catus GN=NUCB1 PE=4 SV=1	tr|M3W064|M3W064_FELCA	53 kDa	0	0	6	0
Cytochrome b-c1 complex subunit Rieske, mitochondrial OS=Felis catus GN=UQCRFS1 PE=4 SV=1	tr|M3X4Y3|M3X4Y3_FELCA	30 kDa	4	0	0	0
Caveolin-1 OS=Felis catus GN=CAV1 PE=3 SV=1	sp|A0M8S7|CAV1_FELCA	21 kDa	4	0	0	0
Neutral cholesterol ester hydrolase 1 OS=Felis catus GN=NCEH1 PE=4 SV=1	tr|M3WQJ7|M3WQJ7_FELCA	48 kDa	0	4	0	0
Sec1 family domain containing 1 OS=Felis catus GN=SCFD1 PE=3 SV=1	tr|M3X6J7|M3X6J7_FELCA (+1)	72 kDa	0	0	4	0
Crystallin zeta like 1 OS=Felis catus GN=CRYZL1 PE=4 SV=1	tr|M3WUS5|M3WUS5_FELCA	39 kDa	0	4	0	0
Stress induced phosphoprotein 1 OS=Felis catus GN=STIP1 PE=4 SV=1	tr|M3W501|M3W501_FELCA	62 kDa	0	0	4	0
Flotillin 1 OS=Felis catus GN=FLOT1 PE=4 SV=1	tr|M3W869|M3W869_FELCA	48 kDa	0	4	0	0
Myosin IB OS=Felis catus GN=MYO1B PE=3 SV=1	tr|M3WJQ2|M3WJQ2_FELCA	131 kDa	0	0	0	6
BCL2 associated athanogene 5 OS=Felis catus GN=BAG5 PE=4 SV=1	tr|M3XEZ1|M3XEZ1_FELCA	51 kDa	0	4	0	0
ATPase H+ transporting V1 subunit E1 OS=Felis catus GN=ATP6V1E1 PE=3 SV=1	tr|M3W8X9|M3W8X9_FELCA	26 kDa	4	0	0	0
Aminopeptidase OS=Felis catus GN=ANPEP PE=3 SV=1	tr|M3WAK1|M3WAK1_FELCA	109 kDa	0	0	0	40
Arginyl-tRNA synthetase OS=Felis catus GN=RARS PE=3 SV=1	tr|M3WRM0|M3WRM0_FELCA	76 kDa	0	0	4	0
Uncharacterized protein OS=Felis catus GN=SQRDL PE=4 SV=1	tr|M3W7Y3|M3W7Y3_FELCA	50 kDa	0	4	0	0
Transmembrane 9 superfamily member OS=Felis catus GN=TM9SF2 PE=3 SV=1	tr|M3XAN0|M3XAN0_FELCA	75 kDa	0	0	0	4
Vesicle transport through interaction with t-SNAREs 1A OS=Felis catus GN=VTI1A PE=4 SV=1	tr|M3WRH1|M3WRH1_FELCA	25 kDa	4	0	0	0
LY6/PLAUR domain containing 4 OS=Felis catus GN=LYPD4 PE=4 SV=1	tr|M3W2Y9|M3W2Y9_FELCA	27 kDa	4	0	0	0
(Bos taurus) Bovine serum albumin precursor	IPI:CON_00708398.1|SWISS-PROT:P02769	69 kDa	0	0	49	0
Collectin subfamily member 12 OS=Felis catus GN=COLEC12 PE=4 SV=1	tr|M3WN82|M3WN82_FELCA	73 kDa	0	0	0	4
Protease, serine 37 OS=Felis catus GN=PRSS37 PE=4 SV=1	tr|M3W653|M3W653_FELCA	27 kDa	4	0	0	0
RAD23 homolog A, nucleotide excision repair protein OS=Felis catus GN=RAD23A PE=4 SV=1	tr|M3X1H1|M3X1H1_FELCA	40 kDa	0	0	4	0
Uncharacterized protein OS=Felis catus PE=4 SV=1	tr|M3XEJ0|M3XEJ0_FELCA	19 kDa	0	4	0	0
Sulfatase modifying factor 1 OS=Felis catus GN=SUMF1 PE=4 SV=1	tr|M3WF85|M3WF85_FELCA (+1)	41 kDa	0	4	0	0
Methionine aminopeptidase OS=Felis catus GN=METAP1 PE=3 SV=1	tr|M3W399|M3W399_FELCA	39 kDa	0	4	0	0
LRRN4 C-terminal like OS=Felis catus GN=LRRN4CL PE=4 SV=1	tr|M3WAD3|M3WAD3_FELCA	26 kDa	4	0	0	0
Complement factor properdin OS=Felis catus GN=CFP PE=4 SV=1	tr|M3W950|M3W950_FELCA	51 kDa	0	0	4	0
Dynein cytoplasmic 1 light intermediate chain 1 OS=Felis catus GN=DYNC1LI1 PE=4 SV=1	tr|M3W8M1|M3W8M1_FELCA	57 kDa	0	7	0	0
B-cell receptor associated protein 29 OS=Felis catus GN=BCAP29 PE=4 SV=1	tr|M3X8G3|M3X8G3_FELCA	28 kDa	4	0	0	0
Tetraspanin OS=Felis catus GN=CD82 PE=3 SV=1	tr|M3WHR5|M3WHR5_FELCA	30 kDa	0	4	0	0
Secreted protein acidic and cysteine rich OS=Felis catus GN=SPARC PE=4 SV=1	tr|M3W550|M3W550_FELCA	37 kDa	0	4	0	0
Dehydrogenase/reductase 7B OS=Felis catus GN=DHRS7B PE=3 SV=1	tr|M3WLF5|M3WLF5_FELCA	35 kDa	4	0	0	0
Uncharacterized protein OS=Felis catus PE=3 SV=1	tr|M3W0X6|M3W0X6_FELCA	17 kDa	4	0	0	0
Integrin beta OS=Felis catus GN=ITGB1 PE=3 SV=1	tr|M3WPL0|M3WPL0_FELCA	88 kDa	0	0	0	33
Guanidinoacetate N-methyltransferase OS=Felis catus GN=GAMT PE=3 SV=1	tr|M3WDW2|M3WDW2_FELCA	26 kDa	4	0	0	0
Uncharacterized protein OS=Felis catus PE=3 SV=1	tr|M3WK49|M3WK49_FELCA	42 kDa	0	7	0	0
Y-box binding protein 2 OS=Felis catus GN=YBX2 PE=4 SV=1	tr|M3WNQ9|M3WNQ9_FELCA	33 kDa	2	0	0	0
Uncharacterized protein OS=Felis catus PE=4 SV=1	tr|M3X4R5|M3X4R5_FELCA	17 kDa	0	6	0	0
Thioredoxin OS=Felis catus GN=TXN PE=3 SV=1	tr|M3W2V1|M3W2V1_FELCA	12 kDa	2	0	0	0
V-set and immunoglobulin domain containing 1 OS=Felis catus GN=VSIG1 PE=4 SV=1	tr|M3XAU7|M3XAU7_FELCA	41 kDa	0	2	0	0
Solute carrier family 29 member 1 (Augustine blood group) OS=Felis catus GN=SLC29A1 PE=4 SV=1	tr|M3WC26|M3WC26_FELCA	50 kDa	0	2	0	0
N-acylsphingosine amidohydrolase 1 OS=Felis catus GN=ASAH1 PE=4 SV=1	tr|M3WMR0|M3WMR0_FELCA	45 kDa	0	2	0	0
Uncharacterized protein OS=Felis catus PE=4 SV=1	tr|M3WXH9|M3WXH9_FELCA (+1)	42 kDa	0	2	0	0
Ribosomal protein S18 OS=Felis catus GN=RPS18 PE=3 SV=1	tr|M3W1E2|M3W1E2_FELCA	18 kDa	2	0	0	0
DEAD-box helicase 17 OS=Felis catus GN=DDX17 PE=3 SV=1	tr|M3X0G5|M3X0G5_FELCA	67 kDa	0	2	0	0
Syntaxin 3 OS=Felis catus GN=STX3 PE=3 SV=1	tr|M3W7W0|M3W7W0_FELCA	33 kDa	0	2	0	0
Uncharacterized protein OS=Felis catus PE=4 SV=1	tr|M3WW06|M3WW06_FELCA	10 kDa	0	2	0	0
Glycoprotein A33 OS=Felis catus GN=GPA33 PE=4 SV=1	tr|M3W3J6|M3W3J6_FELCA	35 kDa	0	2	0	0
Adiponectin, C1Q and collagen domain containing OS=Felis catus GN=ADIPOQ PE=4 SV=1	tr|M3WJN6|M3WJN6_FELCA	27 kDa	0	0	2	0
Armadillo repeat containing 8 OS=Felis catus GN=ARMC8 PE=4 SV=1	tr|M3VXL8|M3VXL8_FELCA	76 kDa	0	2	0	0
Kininogen 1 OS=Felis catus GN=KNG1 PE=4 SV=1	tr|M3WJN1|M3WJN1_FELCA	73 kDa	0	0	2	0
BUB3, mitotic checkpoint protein OS=Felis catus GN=BUB3 PE=4 SV=1	tr|M3WST7|M3WST7_FELCA	37 kDa	0	2	0	0
Delta-aminolevulinic acid dehydratase OS=Felis catus GN=ALAD PE=3 SV=1	tr|M3WB25|M3WB25_FELCA	36 kDa	0	2	0	0
Integrin subunit alpha 6 OS=Felis catus GN=ITGA6 PE=3 SV=1	tr|M3VUR4|M3VUR4_FELCA	115 kDa	0	0	0	2
Steroid 21-hydroxylase OS=Felis catus GN=CYP21 PE=3 SV=1	sp|Q2LA60|CP21A_FELCA (+1)	55 kDa	0	0	0	2
Malectin OS=Felis catus GN=MLEC PE=4 SV=1	tr|M3VYF8|M3VYF8_FELCA	32 kDa	2	0	0	0
Histone H2B OS=Felis catus GN=HIST2H2BE PE=3 SV=1	tr|M3WCZ9|M3WCZ9_FELCA (+10)	14 kDa	2	0	0	0
E1A binding protein p400 OS=Felis catus GN=EP400 PE=4 SV=1	REV_tr|M3WDX3|M3WDX3_FELCA	326 kDa	0	0	3	0
DEAH-box helicase 38 OS=Felis catus GN=DHX38 PE=4 SV=1	REV_tr|M3W4S5|M3W4S5_FELCA	140 kDa	0	2	0	0
Glypican 4 OS=Felis catus GN=GPC4 PE=3 SV=1	tr|M3W6M4|M3W6M4_FELCA	62 kDa	2	0	0	0
Abhydrolase domain containing 14B OS=Felis catus GN=ABHD14B PE=4 SV=1	tr|M3WAW3|M3WAW3_FELCA	23 kDa	2	0	0	0
Renin binding protein OS=Felis catus GN=RENBP PE=4 SV=1	tr|M3WNP8|M3WNP8_FELCA	50 kDa	0	2	0	0
Desmin OS=Felis catus GN=DES PE=3 SV=1	tr|M3WER8|M3WER8_FELCA	54 kDa	0	6	0	0
NADH:ubiquinone oxidoreductase core subunit S3 OS=Felis catus GN=NDUFS3 PE=3 SV=1	tr|M3WBK3|M3WBK3_FELCA	30 kDa	3	0	0	0
ST3 beta-galactoside alpha-2,3-sialyltransferase 4 OS=Felis catus GN=ST3GAL4 PE=3 SV=1	tr|M3WET3|M3WET3_FELCA	38 kDa	0	0	3	0
Ankyrin repeat domain 28 OS=Felis catus GN=ANKRD28 PE=4 SV=1	tr|M3WEV6|M3WEV6_FELCA	112 kDa	0	0	0	3
Ataxin 10 OS=Felis catus GN=ATXN10 PE=4 SV=1	tr|M3WIY7|M3WIY7_FELCA	49 kDa	0	3	0	0
Tropomodulin 1 OS=Felis catus GN=TMOD1 PE=4 SV=1	tr|M3VW72|M3VW72_FELCA	41 kDa	0	4	0	0
Latexin OS=Felis catus GN=LXN PE=4 SV=1	tr|M3WIL4|M3WIL4_FELCA	26 kDa	3	0	0	0
Dystroglycan 1 OS=Felis catus GN=DAG1 PE=2 SV=1	tr|B4XEM8|B4XEM8_FELCA	97 kDa	0	0	0	3
KDEL motif containing 2 OS=Felis catus GN=KDELC2 PE=4 SV=1	tr|M3W7D3|M3W7D3_FELCA	52 kDa	0	0	3	0
ATP-dependent 6-phosphofructokinase OS=Felis catus GN=PFKM PE=3 SV=1	tr|M3WJW8|M3WJW8_FELCA	93 kDa	0	0	0	3
Uncharacterized protein OS=Felis catus GN=LOC102899262 PE=3 SV=1	tr|M3XF95|M3XF95_FELCA	30 kDa	10	0	0	0
Tax_Id=10090 Gene_Symbol=Krt71 Keratin, type II cytoskeletal 6G	IPI:CON_00468956.4|SWISS-PROT:Q9R0H5	57 kDa	4	0	0	0
Solute carrier family 3 member 2 OS=Felis catus GN=SLC3A2 PE=4 SV=1	tr|M3WLC0|M3WLC0_FELCA	58 kDa	0	0	0	3
Uncharacterized protein OS=Felis catus GN=LOC101087599 PE=3 SV=1	tr|M3X260|M3X260_FELCA	78 kDa	0	0	6	0
Uncharacterized protein OS=Felis catus PE=4 SV=1	tr|M3VTY8|M3VTY8_FELCA	14 kDa	0	3	0	0
Vesicle transport through interaction with t-SNAREs 1B OS=Felis catus GN=VTI1B PE=4 SV=1	tr|M3WK20|M3WK20_FELCA	27 kDa	3	0	0	0
Uncharacterized protein OS=Felis catus GN=HNRNPC PE=4 SV=1	tr|M3WLJ6|M3WLJ6_FELCA	34 kDa	3	0	0	0
Uncharacterized protein OS=Felis catus GN=IFIT5 PE=4 SV=1	tr|M3X503|M3X503_FELCA	56 kDa	0	0	3	0
Serpin family G member 1 OS=Felis catus GN=SERPING1 PE=3 SV=1	tr|M3W683|M3W683_FELCA	57 kDa	0	0	0	3
WD repeat domain 77 OS=Felis catus GN=WDR77 PE=4 SV=1	tr|M3W4G4|M3W4G4_FELCA	37 kDa	0	3	0	0
Uncharacterized protein OS=Felis catus PE=4 SV=1	tr|M3XEQ3|M3XEQ3_FELCA	28 kDa	0	0	0	3
Adenylate kinase 2, mitochondrial OS=Felis catus GN=AK2 PE=3 SV=1	tr|M3XCM4|M3XCM4_FELCA	26 kDa	3	0	0	0
Coronin OS=Felis catus GN=CORO1B PE=3 SV=1	tr|M3W0A0|M3W0A0_FELCA	54 kDa	0	0	3	0
Eukaryotic translation initiation factor 6 OS=Felis catus GN=EIF6 PE=3 SV=1	tr|M3W5W5|M3W5W5_FELCA	27 kDa	3	0	0	0
Protein O-fucosyltransferase 1 OS=Felis catus GN=POFUT1 PE=4 SV=1	tr|M3WRS8|M3WRS8_FELCA	44 kDa	0	3	0	0
Hydroxyacylglutathione hydrolase OS=Felis catus GN=HAGH PE=3 SV=1	tr|M3WFN3|M3WFN3_FELCA	34 kDa	3	0	0	0
V-type proton ATPase subunit OS=Felis catus GN=ATP6V0D1 PE=3 SV=1	tr|M3W0C1|M3W0C1_FELCA	40 kDa	0	3	0	0
Uncharacterized protein OS=Felis catus PE=4 SV=1	tr|M3WWU4|M3WWU4_FELCA	27 kDa	0	0	0	4
Ectonucleotide pyrophosphatase/phosphodiesterase 5 (putative) OS=Felis catus GN=ENPP5 PE=4 SV=1	tr|M3X1B4|M3X1B4_FELCA	55 kDa	0	0	0	3
SEC24 homolog C, COPII coat complex component OS=Felis catus GN=SEC24C PE=4 SV=1	tr|M3WE89|M3WE89_FELCA	111 kDa	0	0	0	6
Cadherin 11 OS=Felis catus GN=CDH11 PE=4 SV=1	tr|M3W046|M3W046_FELCA	88 kDa	0	0	0	3
ADAM metallopeptidase domain 10 OS=Felis catus GN=ADAM10 PE=4 SV=1	tr|M3XCR4|M3XCR4_FELCA	83 kDa	0	0	3	0
Basal cell adhesion molecule (Lutheran blood group) OS=Felis catus GN=BCAM PE=4 SV=1	tr|M3W2U8|M3W2U8_FELCA	65 kDa	0	0	0	3
RAB2A, member RAS oncogene family OS=Felis catus GN=RAB2A PE=4 SV=1	tr|M3WVD4|M3WVD4_FELCA (+1)	24 kDa	2	0	0	0
Aldehyde dehydrogenase 8 family member A1 OS=Felis catus GN=ALDH8A1 PE=3 SV=1	tr|M3VXB6|M3VXB6_FELCA	53 kDa	0	0	3	0
Ski2 like RNA helicase 2 OS=Felis catus GN=SKIV2L2 PE=4 SV=1	tr|M3WDJ1|M3WDJ1_FELCA	118 kDa	0	0	0	4
Reticulon OS=Felis catus GN=RTN3 PE=4 SV=1	tr|M3WQJ1|M3WQJ1_FELCA	113 kDa	3	0	0	0
Golgi apparatus membrane protein TVP23 homolog OS=Felis catus GN=TVP23B PE=3 SV=1	tr|M3WRF4|M3WRF4_FELCA	23 kDa	3	0	0	0
ETHE1, persulfide dioxygenase OS=Felis catus GN=ETHE1 PE=4 SV=1	tr|M3X7V2|M3X7V2_FELCA	25 kDa	3	0	0	0
Sorting nexin OS=Felis catus GN=SNX6 PE=3 SV=1	tr|M3WPK1|M3WPK1_FELCA	46 kDa	0	5	0	0
Small nuclear ribonucleoprotein polypeptides B and B1 OS=Felis catus GN=SNRPB PE=4 SV=1	tr|M3WKQ8|M3WKQ8_FELCA (+1)	33 kDa	3	0	0	0
Sorting nexin 1 OS=Felis catus GN=SNX1 PE=4 SV=1	tr|M3W1Q3|M3W1Q3_FELCA	59 kDa	4	0	0	0
Fructose-bisphosphate aldolase OS=Felis catus GN=ALDOB PE=3 SV=1	tr|M3VWL2|M3VWL2_FELCA	40 kDa	0	5	0	0
Uncharacterized protein OS=Felis catus GN=SARS PE=4 SV=1	tr|M3WM92|M3WM92_FELCA (+1)	59 kDa	0	0	3	0
Major prion protein OS=Felis catus GN=PRNP PE=1 SV=3	sp|O18754|PRIO_FELCA	28 kDa	3	0	0	0
Hydroxysteroid 17-beta dehydrogenase 14 OS=Felis catus GN=HSD17B14 PE=4 SV=1	tr|M3W7L9|M3W7L9_FELCA	28 kDa	3	0	0	0
Phospholipid scramblase OS=Felis catus PE=3 SV=1	tr|M3WUX1|M3WUX1_FELCA	35 kDa	3	0	0	0
Ubiquitin carboxyl-terminal hydrolase OS=Felis catus GN=UCHL1 PE=3 SV=1	tr|M3XDW2|M3XDW2_FELCA	25 kDa	3	0	0	0
Uncharacterized protein OS=Felis catus GN=RPS25 PE=4 SV=1	tr|M3VW27|M3VW27_FELCA	14 kDa	3	0	0	0
CD5 molecule like OS=Felis catus GN=CD5L PE=4 SV=1	tr|M3WCL4|M3WCL4_FELCA	39 kDa	0	3	0	0
IQ motif containing GTPase activating protein 2 OS=Felis catus GN=IQGAP2 PE=4 SV=1	tr|M3W048|M3W048_FELCA (+1)	182 kDa	0	0	0	7
Polypeptide N-acetylgalactosaminyltransferase OS=Felis catus GN=GALNT12 PE=3 SV=1	tr|M3WAB2|M3WAB2_FELCA	56 kDa	0	0	3	0
RAB27B, member RAS oncogene family OS=Felis catus GN=RAB27B PE=4 SV=1	tr|M3XES1|M3XES1_FELCA	25 kDa	3	0	0	0
Activated leukocyte cell adhesion molecule OS=Felis catus GN=ALCAM PE=4 SV=1	tr|M3W6Y7|M3W6Y7_FELCA	65 kDa	0	0	0	3
Tubulin gamma chain OS=Felis catus GN=TUBG1 PE=3 SV=1	tr|M3WFJ0|M3WFJ0_FELCA (+1)	51 kDa	0	3	0	0
Adhesion G protein-coupled receptor A2 OS=Felis catus GN=ADGRA2 PE=3 SV=1	tr|M3WMT5|M3WMT5_FELCA	117 kDa	0	0	0	3
Magnesium transporter 1 OS=Felis catus GN=MAGT1 PE=4 SV=1	tr|M3X2H9|M3X2H9_FELCA	38 kDa	3	0	0	0
KRAS proto-oncogene, GTPase OS=Felis catus GN=KRAS PE=4 SV=1	tr|M3XAU6|M3XAU6_FELCA	21 kDa	3	0	0	0
Isoleucyl-tRNA synthetase OS=Felis catus GN=IARS PE=3 SV=1	tr|M3VVG6|M3VVG6_FELCA	144 kDa	0	0	0	3
Actinin alpha 2 OS=Felis catus GN=ACTN2 PE=4 SV=1	tr|M3W273|M3W273_FELCA	101 kDa	0	0	0	19
Chromosome 1 open reading frame 50 OS=Felis catus GN=C1orf50 PE=4 SV=1	tr|M3WGI0|M3WGI0_FELCA	22 kDa	3	0	0	0
NADH-cytochrome b5 reductase OS=Felis catus GN=CYB5R2 PE=3 SV=1	tr|M3W5X3|M3W5X3_FELCA	35 kDa	3	0	0	0
Sjogren syndrome antigen B OS=Felis catus GN=SSB PE=4 SV=1	tr|M3WFE1|M3WFE1_FELCA	47 kDa	0	3	0	0
Lamin A/C OS=Felis catus GN=LMNA PE=4 SV=1	tr|M3WFR2|M3WFR2_FELCA	68 kDa	0	3	0	0
RNA binding motif protein 25 OS=Felis catus GN=RBM25 PE=4 SV=1	tr|M3WFL8|M3WFL8_FELCA	100 kDa	0	0	0	3
Sodium/potassium-transporting ATPase subunit beta OS=Felis catus GN=ATP1B2 PE=3 SV=1	tr|M3WBS4|M3WBS4_FELCA	33 kDa	0	0	3	0
Eukaryotic translation initiation factor 5B OS=Felis catus GN=EIF5B PE=4 SV=1	tr|M3WC43|M3WC43_FELCA	138 kDa	0	0	0	3
ABO, alpha 1-3-N-acetylgalactosaminyltransferase and alpha 1-3-galactosyltransferase OS=Felis catus GN=ABO PE=4 SV=1	tr|M3X8P5|M3X8P5_FELCA	41 kDa	0	3	0	0
Uncharacterized protein OS=Felis catus PE=4 SV=1	tr|M3XDH5|M3XDH5_FELCA	26 kDa	0	0	0	3
Dihydrodiol dehydrogenase OS=Felis catus GN=DHDH PE=4 SV=1	tr|M3W065|M3W065_FELCA	36 kDa	0	3	0	0
Family with sequence similarity 3 member B OS=Felis catus GN=FAM3B PE=4 SV=1	tr|M3VXN0|M3VXN0_FELCA	26 kDa	3	0	0	0
Secretory carrier-associated membrane protein OS=Felis catus GN=SCAMP1 PE=3 SV=1	tr|M3W8E9|M3W8E9_FELCA	38 kDa	3	0	0	0
ADP ribosylation factor interacting protein 1 OS=Felis catus GN=ARFIP1 PE=4 SV=1	tr|M3X3Q7|M3X3Q7_FELCA	42 kDa	3	0	0	0
Kynurenine aminotransferase 1 OS=Felis catus GN=KYAT1 PE=4 SV=1	tr|M3W4U9|M3W4U9_FELCA	56 kDa	0	3	0	0
Tumor protein D52 OS=Felis catus GN=TPD52 PE=4 SV=1	tr|M3WNR0|M3WNR0_FELCA	27 kDa	3	0	0	0
Ribose 5-phosphate isomerase A OS=Felis catus GN=RPIA PE=3 SV=1	tr|M3W8G6|M3W8G6_FELCA	33 kDa	3	0	0	0
Charged multivesicular body protein 2A OS=Felis catus GN=CHMP2A PE=3 SV=1	tr|M3W0W8|M3W0W8_FELCA	25 kDa	3	0	0	0
Clathrin heavy chain OS=Felis catus GN=CLTCL1 PE=3 SV=1	tr|M3VZ24|M3VZ24_FELCA	190 kDa	0	0	0	11
Creatine kinase, M-type OS=Felis catus GN=CKM PE=3 SV=1	tr|M3VYX8|M3VYX8_FELCA	43 kDa	0	5	0	0
ADP ribosylation factor related protein 1 OS=Felis catus GN=ARFRP1 PE=3 SV=1	tr|M3VW46|M3VW46_FELCA	23 kDa	3	0	0	0
Uncharacterized protein OS=Felis catus PE=3 SV=1	tr|M3W4T8|M3W4T8_FELCA (+1)	34 kDa	3	0	0	0
Tripeptidyl peptidase 2 OS=Felis catus GN=TPP2 PE=4 SV=1	tr|M3W1R8|M3W1R8_FELCA	140 kDa	0	0	0	3
Solute carrier family 44 member 4 OS=Felis catus GN=SLC44A4 PE=3 SV=1	tr|M3W2B6|M3W2B6_FELCA	79 kDa	0	0	0	3
Phospholipid phosphatase 1 OS=Felis catus GN=PLPP1 PE=4 SV=1	tr|M3X9V6|M3X9V6_FELCA	32 kDa	3	0	0	0
Uncharacterized protein OS=Felis catus GN=LOC101098145 PE=4 SV=1	tr|M3X301|M3X301_FELCA	30 kDa	4	0	0	0
Uncharacterized protein OS=Felis catus PE=4 SV=1	tr|M3WVJ0|M3WVJ0_FELCA (+1)	11 kDa	3	0	0	0
Uncharacterized protein OS=Felis catus PE=4 SV=1	tr|M3X0T7|M3X0T7_FELCA	12 kDa	6	0	0	0
Phospholipid scramblase OS=Felis catus GN=PLSCR3 PE=3 SV=1	tr|M3WE53|M3WE53_FELCA	32 kDa	3	0	0	0
High mobility group box 2 OS=Felis catus GN=HMGB2 PE=4 SV=1	tr|M3W1S7|M3W1S7_FELCA	24 kDa	6	0	0	0
Phosphatidylinositol-5-phosphate 4-kinase type 2 alpha OS=Felis catus GN=PIP4K2A PE=4 SV=1	tr|M3W460|M3W460_FELCA	46 kDa	0	3	0	0
Transformer 2 beta homolog OS=Felis catus GN=TRA2B PE=4 SV=1	tr|M3WDF5|M3WDF5_FELCA	34 kDa	3	0	0	0
Uncharacterized protein OS=Felis catus PE=4 SV=1	tr|M3WV47|M3WV47_FELCA	14 kDa	3	0	0	0
Zinc finger protein 132 OS=Felis catus GN=ZNF132 PE=4 SV=1	tr|M3WTQ8|M3WTQ8_FELCA	84 kDa	0	2	0	0
Glycoprotein-N-acetylgalactosamine 3-beta-galactosyltransferase 1 OS=Felis catus GN=C1GALT1 PE=3 SV=1	tr|M3WT46|M3WT46_FELCA	42 kDa	0	3	0	0
Phosphatidylinositol-3,4,5-trisphosphate dependent Rac exchange factor 1 OS=Felis catus GN=PREX1 PE=4 SV=1	tr|M3W258|M3W258_FELCA	179 kDa	0	3	0	0
Utrophin OS=Felis catus GN=UTRN PE=4 SV=1	REV_tr|M3WGY0|M3WGY0_FELCA	394 kDa	3	0	0	0
Tax_Id=9606 Gene_Symbol=ALB Isoform 1 of Serum albumin precursor	IPI:CON_00745872.2|SWISS-PROT:P02768-1 (+1)	69 kDa	9	0	0	0
Bloom syndrome RecQ like helicase OS=Felis catus GN=BLM PE=4 SV=1	REV_tr|M3W592|M3W592_FELCA	158 kDa	0	2	0	0
F-box protein 6 OS=Felis catus GN=FBXO6 PE=4 SV=1	tr|M3VU09|M3VU09_FELCA	31 kDa	2	0	0	0
Uncharacterized protein OS=Felis catus GN=RANBP1 PE=4 SV=1	tr|M3W1P9|M3W1P9_FELCA	18 kDa	2	0	0	0
Uncharacterized protein OS=Felis catus PE=4 SV=1	tr|M3W3Q0|M3W3Q0_FELCA	14 kDa	2	0	0	0
Uncharacterized protein OS=Felis catus PE=4 SV=1	tr|M3W5R2|M3W5R2_FELCA	41 kDa	0	0	0	2
Actin like 6A OS=Felis catus GN=ACTL6A PE=3 SV=1	tr|M3WGS8|M3WGS8_FELCA	47 kDa	0	2	0	0
Glutathione peroxidase OS=Felis catus GN=GPX3 PE=3 SV=1	tr|M3WHS6|M3WHS6_FELCA	25 kDa	2	0	0	0
ST6 beta-galactoside alpha-2,6-sialyltransferase 1 OS=Felis catus GN=ST6GAL1 PE=3 SV=1	tr|M3WJN7|M3WJN7_FELCA	46 kDa	0	0	2	0
Uncharacterized protein OS=Felis catus PE=4 SV=1	tr|M3WS12|M3WS12_FELCA	24 kDa	2	0	0	0
Uncharacterized protein OS=Felis catus PE=4 SV=1	tr|M3X1Q2|M3X1Q2_FELCA	10 kDa	2	0	0	0
Uncharacterized protein OS=Felis catus PE=4 SV=1	tr|M3X4E4|M3X4E4_FELCA	14 kDa	0	0	0	2
Protein YIPF OS=Felis catus GN=YIPF4 PE=3 SV=1	tr|M3XEX6|M3XEX6_FELCA	27 kDa	2	0	0	0
Testis expressed 101 OS=Felis catus GN=TEX101 PE=4 SV=1	tr|M3W785|M3W785_FELCA	28 kDa	0	2	0	0
Uncharacterized protein OS=Felis catus GN=METTL7A PE=4 SV=1	tr|M3WJP2|M3WJP2_FELCA	28 kDa	2	0	0	0
DnaJ heat shock protein family (Hsp40) member C5 OS=Felis catus GN=DNAJC5 PE=4 SV=1	tr|M3VW52|M3VW52_FELCA	22 kDa	2	0	0	0
Enolase 3 OS=Felis catus GN=ENO3 PE=3 SV=1	tr|M3VX63|M3VX63_FELCA	47 kDa	0	22	0	0
Phosphoribosyl transferase domain containing 1 OS=Felis catus GN=PRTFDC1 PE=4 SV=1	tr|M3VV03|M3VV03_FELCA	26 kDa	2	0	0	0
Haloacid dehalogenase like hydrolase domain containing 2 OS=Felis catus GN=HDHD2 PE=4 SV=1	tr|M3VZ53|M3VZ53_FELCA	29 kDa	2	0	0	0
Prenylcysteine oxidase 1 like OS=Felis catus GN=PCYOX1L PE=3 SV=1	tr|M3W0N9|M3W0N9_FELCA	52 kDa	0	0	2	0
Uncharacterized protein OS=Felis catus GN=FOLR2 PE=4 SV=1	tr|M3W3V7|M3W3V7_FELCA	29 kDa	3	0	0	0
ATP synthase, H+ transporting, mitochondrial Fo complex subunit B1 OS=Felis catus GN=ATP5F1 PE=4 SV=1	tr|M3WS49|M3WS49_FELCA (+1)	29 kDa	2	0	0	0
Calcium-transporting ATPase OS=Felis catus GN=ATP2A2 PE=3 SV=1	tr|M3XCL4|M3XCL4_FELCA	105 kDa	0	0	0	2
Solute carrier family 25 member 4 OS=Felis catus GN=SLC25A4 PE=3 SV=1	tr|M3X5F6|M3X5F6_FELCA	30 kDa	4	0	0	0
Alpha-1-acid glycoprotein OS=Felis catus GN=AGP PE=3 SV=1	tr|M3VU75|M3VU75_FELCA	23 kDa	0	0	2	0
Thioredoxin domain containing 9 OS=Felis catus GN=TXNDC9 PE=4 SV=1	tr|M3WID0|M3WID0_FELCA	27 kDa	2	0	0	0
Leucyl-tRNA synthetase OS=Felis catus GN=LARS PE=3 SV=1	tr|M3WA40|M3WA40_FELCA	135 kDa	0	0	0	2
Actin-related protein 2/3 complex subunit 4 OS=Felis catus GN=ARPC4 PE=3 SV=1	tr|M3WSL5|M3WSL5_FELCA	22 kDa	2	0	0	0
Uncharacterized protein OS=Felis catus GN=HSD3B2 PE=3 SV=1	tr|M3XEC5|M3XEC5_FELCA	42 kDa	0	2	0	0
Stomatin like 2 OS=Felis catus GN=STOML2 PE=4 SV=1	tr|M3VW09|M3VW09_FELCA	39 kDa	0	2	0	0
Charged multivesicular body protein 1A OS=Felis catus GN=CHMP1A PE=4 SV=1	tr|M3XFV1|M3XFV1_FELCA	22 kDa	2	0	0	0
Inosine triphosphate pyrophosphatase OS=Felis catus GN=ITPA PE=3 SV=1	tr|M3WIT7|M3WIT7_FELCA	23 kDa	2	0	0	0
CD59 molecule (CD59 blood group) OS=Felis catus GN=CD59 PE=4 SV=1	tr|M3WCR6|M3WCR6_FELCA	14 kDa	2	0	0	0
Receptor protein-tyrosine kinase OS=Felis catus GN=EGFR PE=3 SV=1	tr|M3WMN1|M3WMN1_FELCA	134 kDa	0	0	0	2
EGF like repeats and discoidin domains 3 OS=Felis catus GN=EDIL3 PE=4 SV=1	tr|M3VYL7|M3VYL7_FELCA	54 kDa	0	0	2	0
Actin-related protein 2/3 complex subunit 3 OS=Felis catus GN=ARPC3 PE=3 SV=1	tr|M3W1M4|M3W1M4_FELCA (+1)	21 kDa	2	0	0	0
Uncharacterized protein OS=Felis catus PE=4 SV=1	tr|M3XC38|M3XC38_FELCA	16 kDa	0	0	0	2
Protein-L-isoaspartate O-methyltransferase OS=Felis catus GN=PCMT1 PE=3 SV=1	tr|M3WYS3|M3WYS3_FELCA	25 kDa	2	0	0	0
Uncharacterized protein OS=Felis catus PE=4 SV=1	tr|M3WQW2|M3WQW2_FELCA	28 kDa	2	0	0	0
Tyrosine--tRNA ligase OS=Felis catus GN=YARS PE=3 SV=1	tr|M3VV93|M3VV93_FELCA (+1)	59 kDa	0	0	2	0
Ubiquitin like modifier activating enzyme 6 OS=Felis catus GN=UBA6 PE=4 SV=1	tr|M3W5E9|M3W5E9_FELCA	116 kDa	0	0	0	2
Uncharacterized protein OS=Felis catus PE=4 SV=1	tr|M3X5B6|M3X5B6_FELCA	46 kDa	0	0	0	2
Contactin 1 OS=Felis catus GN=CNTN1 PE=4 SV=1	tr|M3X487|M3X487_FELCA (+1)	113 kDa	0	0	0	2
Galactosylgalactosylxylosylprotein 3-beta-glucuronosyltransferase OS=Felis catus GN=B3GAT3 PE=3 SV=1	tr|M3WAD0|M3WAD0_FELCA	37 kDa	0	2	0	0
Trafficking protein particle complex 4 OS=Felis catus GN=TRAPPC4 PE=4 SV=1	tr|M3VW28|M3VW28_FELCA	24 kDa	2	0	0	0
Tetraspanin OS=Felis catus GN=TSPAN9 PE=3 SV=1	tr|M3XE22|M3XE22_FELCA	27 kDa	2	0	0	0
Adenosine deaminase OS=Felis catus GN=ADA PE=3 SV=1	tr|M3VYK1|M3VYK1_FELCA	40 kDa	0	2	0	0
Vacuolar protein sorting-associated protein 29 OS=Felis catus GN=VPS29 PE=3 SV=1	tr|M3W1M7|M3W1M7_FELCA	21 kDa	2	0	0	0
WD repeat domain 18 OS=Felis catus GN=WDR18 PE=4 SV=1	tr|M3W7H8|M3W7H8_FELCA	48 kDa	0	2	0	0
Cysteine rich with EGF like domains 2 OS=Felis catus GN=CRELD2 PE=4 SV=1	tr|M3WQ40|M3WQ40_FELCA	39 kDa	0	0	2	0
Uncharacterized protein OS=Felis catus PE=4 SV=1	tr|M3WVS6|M3WVS6_FELCA	35 kDa	0	0	0	6
Phosphoglycerate kinase OS=Felis catus GN=PGK2 PE=3 SV=1	tr|M3X166|M3X166_FELCA	45 kDa	0	15	0	0
Uncharacterized protein OS=Felis catus GN=ARPIN PE=4 SV=1	tr|M3XAT9|M3XAT9_FELCA	22 kDa	2	0	0	0
Glutathione peroxidase OS=Felis catus GN=GPX1 PE=3 SV=1	tr|M3WVG5|M3WVG5_FELCA	16 kDa	2	0	0	0
Pleckstrin homology domain containing O2 OS=Felis catus GN=PLEKHO2 PE=4 SV=1	tr|M3XFT1|M3XFT1_FELCA	54 kDa	0	0	0	2
Uncharacterized protein OS=Felis catus PE=4 SV=1	tr|M3VWN2|M3VWN2_FELCA	68 kDa	0	0	0	2
WASH complex subunit 4 OS=Felis catus GN=WASHC4 PE=4 SV=1	tr|M3VWP4|M3VWP4_FELCA	134 kDa	0	0	0	2
Uncharacterized protein OS=Felis catus GN=SHPK PE=4 SV=1	tr|M3W8M5|M3W8M5_FELCA	51 kDa	0	2	0	0
Uncharacterized protein OS=Felis catus GN=CRYZ PE=4 SV=1	tr|M3XG55|M3XG55_FELCA	35 kDa	0	2	0	0
Signal recognition particle subunit SRP68 OS=Felis catus GN=SRP68 PE=3 SV=1	tr|M3W4N6|M3W4N6_FELCA	70 kDa	0	0	0	2
Solute carrier family 15 member 1 OS=Felis catus GN=SLC15A1 PE=3 SV=1	tr|M3WLG5|M3WLG5_FELCA	79 kDa	0	0	0	2
DEAH-box helicase 15 OS=Felis catus GN=DHX15 PE=4 SV=1	tr|M3WB16|M3WB16_FELCA	91 kDa	0	0	0	2
Retinol saturase OS=Felis catus GN=RETSAT PE=4 SV=1	tr|M3W085|M3W085_FELCA	67 kDa	0	0	2	0
Serine/threonine-protein phosphatase OS=Felis catus GN=PPP1CB PE=3 SV=1	tr|M3XDH6|M3XDH6_FELCA	37 kDa	0	2	0	0
Calmegin OS=Felis catus GN=CLGN PE=3 SV=1	tr|M3WPF0|M3WPF0_FELCA	70 kDa	0	0	0	3
Charged multivesicular body protein 2B OS=Felis catus GN=CHMP2B PE=3 SV=1	tr|M3WYZ6|M3WYZ6_FELCA	24 kDa	2	0	0	0
Zinc finger Ran-binding domain-containing protein 2 OS=Felis catus GN=ZRANB2 PE=3 SV=1	tr|M3WWN3|M3WWN3_FELCA	37 kDa	0	2	0	0
Adenylyl cyclase-associated protein OS=Felis catus GN=CAP2 PE=3 SV=1	tr|M3WFC4|M3WFC4_FELCA	53 kDa	0	0	4	0
Uncharacterized protein OS=Felis catus PE=4 SV=1	tr|M3XG22|M3XG22_FELCA	13 kDa	2	0	0	0
Uncharacterized protein OS=Felis catus PE=4 SV=1	tr|M3XDV4|M3XDV4_FELCA	13 kDa	2	0	0	0
Phospholipid phosphatase 3 OS=Felis catus GN=PLPP3 PE=4 SV=1	tr|M3WKE1|M3WKE1_FELCA	30 kDa	2	0	0	0
ER membrane protein complex subunit 3 OS=Felis catus GN=EMC3 PE=3 SV=1	tr|M3WUY6|M3WUY6_FELCA	30 kDa	2	0	0	0
Nitrilase family member 2 OS=Felis catus GN=NIT2 PE=4 SV=1	tr|M3XFS6|M3XFS6_FELCA	31 kDa	2	0	0	0
Glutathione S-transferase kappa OS=Felis catus GN=GSTK1 PE=3 SV=1	tr|M3W7F3|M3W7F3_FELCA	25 kDa	2	0	0	0
Malic enzyme OS=Felis catus GN=ME1 PE=3 SV=1	tr|M3XGA0|M3XGA0_FELCA	55 kDa	0	0	2	0
Uncharacterized protein OS=Felis catus PE=4 SV=1	tr|M3VZ04|M3VZ04_FELCA	17 kDa	2	0	0	0
LIM and cysteine rich domains 1 OS=Felis catus GN=LMCD1 PE=4 SV=1	tr|M3WL80|M3WL80_FELCA	36 kDa	0	2	0	0
Ring finger protein 103 OS=Felis catus GN=RNF103 PE=3 SV=1	tr|M3WJ63|M3WJ63_FELCA	28 kDa	2	0	0	0
Synaptogyrin OS=Felis catus GN=SYNGR2 PE=3 SV=1	tr|M3X775|M3X775_FELCA	24 kDa	2	0	0	0
NADH:ubiquinone oxidoreductase core subunit S2 OS=Felis catus GN=NDUFS2 PE=3 SV=1	tr|M3WN83|M3WN83_FELCA	48 kDa	0	2	0	0
Serine/threonine kinase 24 OS=Felis catus GN=STK24 PE=4 SV=1	tr|M3WLG2|M3WLG2_FELCA	48 kDa	0	0	2	0
Uncharacterized protein OS=Felis catus PE=4 SV=1	tr|M3VU54|M3VU54_FELCA (+1)	21 kDa	2	0	0	0
Endoplasmic reticulum oxidoreductase 1 beta OS=Felis catus GN=ERO1B PE=4 SV=1	tr|M3W090|M3W090_FELCA	53 kDa	0	0	2	0
Formin like 2 OS=Felis catus GN=FMNL2 PE=4 SV=1	tr|M3W3Q3|M3W3Q3_FELCA (+1)	120 kDa	0	0	0	2
Septin 8 OS=Felis catus GN=SEPT8 PE=3 SV=1	tr|M3WJZ6|M3WJZ6_FELCA	56 kDa	0	0	6	0
Polyadenylate-binding protein OS=Felis catus GN=PABPC4 PE=3 SV=1	tr|M3WM89|M3WM89_FELCA	72 kDa	0	9	0	0
UDP-glucuronosyltransferase OS=Felis catus PE=3 SV=1	tr|M3WSM3|M3WSM3_FELCA	42 kDa	0	2	0	0
Sigma non-opioid intracellular receptor 1 OS=Felis catus GN=SIGMAR1 PE=4 SV=1	tr|M3WWZ5|M3WWZ5_FELCA	25 kDa	2	0	0	0
Uncharacterized protein OS=Felis catus PE=4 SV=1	tr|M3X452|M3X452_FELCA	14 kDa	0	0	0	3
VPS26, retromer complex component A OS=Felis catus GN=VPS26A PE=4 SV=1	tr|M3XEG2|M3XEG2_FELCA	42 kDa	0	2	0	0
Atlastin GTPase 1 OS=Felis catus GN=ATL1 PE=4 SV=1	tr|M3WXA3|M3WXA3_FELCA	61 kDa	0	0	2	0
ER membrane protein complex subunit 10 OS=Felis catus GN=EMC10 PE=4 SV=1	tr|M3VUJ9|M3VUJ9_FELCA	27 kDa	2	0	0	0
Lipocalin 9 OS=Felis catus GN=LCN9 PE=4 SV=1	tr|M3WIX8|M3WIX8_FELCA (+1)	17 kDa	2	0	0	0
Stromal cell derived factor 2 OS=Felis catus GN=SDF2 PE=4 SV=1	tr|M3WTF2|M3WTF2_FELCA	23 kDa	2	0	0	0
Serine and arginine rich splicing factor 9 OS=Felis catus GN=SRSF9 PE=4 SV=1	tr|M3WEB9|M3WEB9_FELCA	26 kDa	3	0	0	0
Hydroxymethylglutaryl-CoA synthase OS=Felis catus GN=HMGCS1 PE=3 SV=1	tr|M3WG47|M3WG47_FELCA	57 kDa	0	0	0	2
LanC like 1 OS=Felis catus GN=LANCL1 PE=4 SV=1	tr|M3X2Y7|M3X2Y7_FELCA	45 kDa	0	2	0	0
Hexosyltransferase OS=Felis catus GN=B3GALT4 PE=3 SV=1	tr|M3W1E3|M3W1E3_FELCA	43 kDa	0	2	0	0
Olfactomedin like 3 OS=Felis catus GN=OLFML3 PE=4 SV=1	tr|M3WB23|M3WB23_FELCA	46 kDa	0	0	0	2
40S ribosomal protein S12 OS=Felis catus PE=3 SV=1	tr|M3WZH1|M3WZH1_FELCA	13 kDa	2	0	0	0
Biliverdin reductase B OS=Felis catus GN=BLVRB PE=4 SV=1	tr|M3VVW0|M3VVW0_FELCA	22 kDa	2	0	0	0
UPF1, RNA helicase and ATPase OS=Felis catus GN=UPF1 PE=4 SV=1	tr|M3WC21|M3WC21_FELCA	119 kDa	0	0	0	2
SPRY domain containing 7 OS=Felis catus GN=SPRYD7 PE=4 SV=1	tr|M3X973|M3X973_FELCA	22 kDa	2	0	0	0
Tumor susceptibility 101 OS=Felis catus GN=TSG101 PE=4 SV=1	tr|M3WZG1|M3WZG1_FELCA	44 kDa	2	0	0	0
RAB3 GTPase activating non-catalytic protein subunit 2 OS=Felis catus GN=RAB3GAP2 PE=4 SV=1	tr|M3VYT6|M3VYT6_FELCA	156 kDa	0	0	0	2
Biphenyl hydrolase like OS=Felis catus GN=BPHL PE=4 SV=1	tr|M3WL14|M3WL14_FELCA	34 kDa	2	0	0	0
Inositol polyphosphate phosphatase like 1 OS=Felis catus GN=INPPL1 PE=4 SV=1	tr|M3W3V8|M3W3V8_FELCA (+1)	138 kDa	0	0	0	2
Uncharacterized protein OS=Felis catus PE=4 SV=1	tr|M3WN91|M3WN91_FELCA	15 kDa	2	0	0	0
Uncharacterized protein OS=Felis catus PE=4 SV=1	tr|M3WSY1|M3WSY1_FELCA	15 kDa	0	0	0	4
Secernin 2 OS=Felis catus GN=SCRN2 PE=4 SV=1	tr|M3WBA3|M3WBA3_FELCA	48 kDa	0	2	0	0
Cathepsin H OS=Felis catus GN=CTSH PE=3 SV=1	tr|M3WGI2|M3WGI2_FELCA	37 kDa	2	0	0	0
Carboxypeptidase Q OS=Felis catus GN=CPQ PE=4 SV=1	tr|M3WQN1|M3WQN1_FELCA	52 kDa	0	0	2	0
Acetyl-CoA acetyltransferase 2 OS=Felis catus GN=ACAT2 PE=3 SV=1	tr|M3VZ88|M3VZ88_FELCA	41 kDa	0	2	0	0
Glutamate metabotropic receptor 4 OS=Felis catus GN=GRM4 PE=3 SV=1	REV_tr|M3WMF4|M3WMF4_FELCA	102 kDa	2	0	0	0
Transketolase like 1 OS=Felis catus GN=TKTL1 PE=4 SV=1	tr|M3WF11|M3WF11_FELCA	67 kDa	0	0	3	0
Cysteine rich protein 2 OS=Felis catus GN=CRIP2 PE=4 SV=1	tr|M3VV86|M3VV86_FELCA	21 kDa	2	0	0	0
Uncharacterized protein OS=Felis catus GN=TSNAX PE=4 SV=1	tr|M3X5Z0|M3X5Z0_FELCA	33 kDa	2	0	0	0
Transmembrane protein 19 OS=Felis catus GN=TMEM19 PE=4 SV=1	tr|M3WJC1|M3WJC1_FELCA	36 kDa	2	0	0	0
CD47 molecule OS=Felis catus GN=CD47 PE=4 SV=1	tr|M3WBM1|M3WBM1_FELCA	34 kDa	0	0	0	2
Secretion associated Ras related GTPase 1B OS=Felis catus GN=SAR1B PE=3 SV=1	tr|M3VUK3|M3VUK3_FELCA (+1)	22 kDa	2	0	0	0
Stromal cell derived factor 2 like 1 OS=Felis catus GN=SDF2L1 PE=4 SV=1	tr|M3W8T3|M3W8T3_FELCA	26 kDa	2	0	0	0
Uveal autoantigen with coiled-coil domains and ankyrin repeats OS=Felis catus GN=UACA PE=4 SV=1	tr|M3VWI2|M3VWI2_FELCA	161 kDa	2	0	0	0
Glucosylceramidase OS=Felis catus GN=GBA PE=3 SV=1	tr|M3VVL7|M3VVL7_FELCA (+1)	60 kDa	0	0	2	0
Uncharacterized protein OS=Felis catus GN=EIF4G1 PE=4 SV=1	tr|M3W8E0|M3W8E0_FELCA	177 kDa	0	0	0	2
Protein O-linked mannose N-acetylglucosaminyltransferase 2 (beta 1,4-) OS=Felis catus GN=POMGNT2 PE=4 SV=1	tr|M3VUY7|M3VUY7_FELCA	66 kDa	0	0	2	0
ATPase H+ transporting V1 subunit D OS=Felis catus GN=ATP6V1D PE=4 SV=1	tr|M3WEF5|M3WEF5_FELCA	28 kDa	2	0	0	0
Uncharacterized protein OS=Felis catus PE=4 SV=1	tr|M3WUE7|M3WUE7_FELCA	27 kDa	6	0	0	0
HAUS augmin like complex subunit 5 OS=Felis catus GN=HAUS5 PE=4 SV=1	tr|M3X197|M3X197_FELCA	71 kDa	2	0	0	0
Transportin 3 OS=Felis catus GN=TNPO3 PE=4 SV=1	tr|M3WPH3|M3WPH3_FELCA	104 kDa	0	0	0	2
NCK adaptor protein 1 OS=Felis catus GN=NCK1 PE=4 SV=1	tr|M3VXA9|M3VXA9_FELCA	43 kDa	0	2	0	0
DnaJ heat shock protein family (Hsp40) member A3 OS=Felis catus GN=DNAJA3 PE=3 SV=1	tr|M3WGU5|M3WGU5_FELCA	52 kDa	0	2	0	0
Signal transducer and activator of transcription OS=Felis catus GN=STAT1 PE=3 SV=1	tr|M3WJD7|M3WJD7_FELCA	87 kDa	0	0	0	2
Tissue specific transplantation antigen P35B OS=Felis catus GN=TSTA3 PE=3 SV=1	tr|M3VVW7|M3VVW7_FELCA	36 kDa	0	2	0	0
Capping actin protein of muscle Z-line alpha subunit 1 OS=Felis catus GN=CAPZA1 PE=3 SV=1	tr|M3WIM3|M3WIM3_FELCA	33 kDa	0	5	0	0
Phosphatidylinositol-5-phosphate 4-kinase type 2 gamma OS=Felis catus GN=PIP4K2C PE=4 SV=1	tr|M3X147|M3X147_FELCA	47 kDa	0	2	0	0
Chromosome 16 open reading frame 58 OS=Felis catus GN=C16orf58 PE=4 SV=1	tr|M3XBD1|M3XBD1_FELCA	51 kDa	0	2	0	0
Myosin IF OS=Felis catus GN=MYO1F PE=3 SV=1	tr|M3WM71|M3WM71_FELCA	125 kDa	0	0	0	3
Solute carrier family 25 member 6 OS=Felis catus GN=SLC25A6 PE=3 SV=1	tr|M3VW78|M3VW78_FELCA	29 kDa	5	0	0	0
Vasorin OS=Felis catus GN=VASN PE=4 SV=1	tr|M3WEQ2|M3WEQ2_FELCA	72 kDa	0	0	0	2
Annexin OS=Felis catus GN=ANXA3 PE=3 SV=1	tr|M3WET7|M3WET7_FELCA	36 kDa	4	0	0	0
Myotubularin related protein 2 OS=Felis catus GN=MTMR2 PE=3 SV=1	tr|M3X099|M3X099_FELCA	66 kDa	0	0	2	0
Scavenger receptor class B member 2 OS=Felis catus GN=SCARB2 PE=3 SV=1	tr|M3VW08|M3VW08_FELCA	54 kDa	0	0	0	2
Myeloid leukemia factor 1 OS=Felis catus GN=MLF1 PE=4 SV=1	tr|M3WR71|M3WR71_FELCA	31 kDa	2	0	0	0
BCL2 interacting protein 1 OS=Felis catus GN=BNIP1 PE=4 SV=1	tr|M3VUY5|M3VUY5_FELCA	26 kDa	2	0	0	0
ATPase H+ transporting accessory protein 1 OS=Felis catus GN=ATP6AP1 PE=4 SV=1	tr|M3WF16|M3WF16_FELCA	42 kDa	0	0	2	0
Phenylalanyl-tRNA synthetase beta subunit OS=Felis catus GN=FARSB PE=4 SV=1	tr|M3X0C2|M3X0C2_FELCA	66 kDa	0	0	2	0
Uncharacterized protein OS=Felis catus PE=3 SV=1	tr|M3WA72|M3WA72_FELCA	160 kDa	0	0	2	0
Coiled-coil domain containing 170 OS=Felis catus GN=CCDC170 PE=4 SV=1	tr|M3WCV7|M3WCV7_FELCA	80 kDa	0	0	0	2
RAB, member RAS oncogene family like 6 OS=Felis catus GN=RABL6 PE=4 SV=1	REV_tr|M3WGJ8|M3WGJ8_FELCA	79 kDa	0	0	0	2
Dynein axonemal heavy chain 8 OS=Felis catus GN=DNAH8 PE=4 SV=1	REV_tr|M3WEE1|M3WEE1_FELCA	515 kDa	0	0	3	0
Vacuolar protein sorting 13 homolog C OS=Felis catus GN=VPS13C PE=4 SV=1	tr|M3XCG9|M3XCG9_FELCA	344 kDa	2	0	0	0
Heterogeneous nuclear ribonucleoprotein U OS=Felis catus GN=HNRNPU PE=4 SV=1	tr|M3VY03|M3VY03_FELCA	91 kDa	0	0	0	2
Melanoma cell adhesion molecule OS=Felis catus GN=MCAM PE=4 SV=1	tr|M3VVS0|M3VVS0_FELCA	71 kDa	0	0	0	2
HYDIN, axonemal central pair apparatus protein OS=Felis catus GN=HYDIN PE=4 SV=1	tr|M3WSD0|M3WSD0_FELCA	524 kDa	0	0	2	0
Nebulin OS=Felis catus GN=NEB PE=4 SV=1	tr|M3W6H8|M3W6H8_FELCA	774 kDa	0	0	2	0
Uncharacterized protein OS=Felis catus PE=4 SV=1	tr|M3WQG8|M3WQG8_FELCA	27 kDa	0	0	0	4
Prothrombin OS=Felis catus GN=F2 PE=3 SV=1	tr|M3WSI8|M3WSI8_FELCA	70 kDa	0	0	0	2
Uncharacterized protein OS=Felis catus GN=MCCC2 PE=4 SV=1	tr|M3WJQ5|M3WJQ5_FELCA	61 kDa	0	0	2	0
CCR4-NOT transcription complex subunit 3 OS=Felis catus GN=CNOT3 PE=4 SV=1	REV_tr|M3WJZ2|M3WJZ2_FELCA	94 kDa	2	0	0	0
ArfGAP with RhoGAP domain, ankyrin repeat and PH domain 2 OS=Felis catus GN=ARAP2 PE=4 SV=1	tr|M3W2Q2|M3W2Q2_FELCA	194 kDa	0	2	0	0
Target of myb1 like 1 membrane trafficking protein OS=Felis catus GN=TOM1L1 PE=3 SV=1	tr|M3VZB5|M3VZB5_FELCA (+2)	53 kDa	0	0	2	0
Unc-80 homolog, NALCN activator OS=Felis catus GN=UNC80 PE=4 SV=1	REV_tr|M3X8J9|M3X8J9_FELCA	368 kDa	0	0	0	2

## Sheet: Protein Report - CON
Identified Proteins (1227)	Accession Number	Molecular Weight	SpC 41364	SpC 41365	SpC 41366	SpC 41367
Annexin OS=Felis catus GN=ANXA2 PE=3 SV=1	tr|M3W8I8|M3W8I8_FELCA	39 kDa	60	71	34	31
Uncharacterized protein OS=Felis catus GN=YWHAZ PE=3 SV=1	tr|M3XAX6|M3XAX6_FELCA	28 kDa	55	7	2	5
Serum albumin OS=Felis catus GN=ALB PE=1 SV=1	sp|P49064|ALBU_FELCA	69 kDa	54	89	243	57
B-cell receptor-associated protein 31 OS=Felis catus GN=BCAP31 PE=4 SV=1	tr|M3W1G2|M3W1G2_FELCA	28 kDa	51	0	0	0
Uncharacterized protein OS=Felis catus GN=RPL7 PE=4 SV=1	tr|M3X9H4|M3X9H4_FELCA	30 kDa	50	21	15	8
Tyrosine 3-monooxygenase/tryptophan 5-monooxygenase activation protein theta OS=Felis catus GN=YWHAQ PE=3 SV=1	tr|M3W8I2|M3W8I2_FELCA	28 kDa	48	10	5	8
Purine nucleoside phosphorylase OS=Felis catus GN=PNP PE=3 SV=1	tr|M3W6S5|M3W6S5_FELCA	32 kDa	47	6	3	0
Annexin OS=Felis catus GN=ANXA5 PE=3 SV=1	tr|M3W269|M3W269_FELCA	36 kDa	46	23	2	0
Uncharacterized protein OS=Felis catus GN=RPL7A PE=4 SV=1	tr|M3W4S2|M3W4S2_FELCA	30 kDa	45	7	0	2
Tyrosine 3-monooxygenase/tryptophan 5-monooxygenase activation protein beta OS=Felis catus GN=YWHAB PE=3 SV=1	tr|M3WFK3|M3WFK3_FELCA	28 kDa	44	0	0	0
Actin gamma 1 OS=Felis catus GN=ACTG1 PE=3 SV=1	tr|M3WRZ7|M3WRZ7_FELCA	42 kDa	43	209	82	58
40S ribosomal protein S4, X isoform OS=Felis catus GN=RPS4X PE=2 SV=2	sp|P62705|RS4X_FELCA	30 kDa	41	8	7	9
Ribosomal protein OS=Felis catus GN=RPL10A PE=3 SV=1	tr|M3WHU6|M3WHU6_FELCA	25 kDa	41	0	0	0
60S ribosomal protein L13 OS=Felis catus GN=RPL13 PE=3 SV=1	tr|M3W059|M3W059_FELCA	24 kDa	39	9	2	8
Tyrosine 3-monooxygenase/tryptophan 5-monooxygenase activation protein epsilon OS=Felis catus GN=YWHAE PE=3 SV=1	tr|M3WEZ7|M3WEZ7_FELCA	27 kDa	39	0	0	0
Endoplasmic reticulum resident protein 29 OS=Felis catus GN=ERP29 PE=4 SV=1	tr|M3X8E4|M3X8E4_FELCA	29 kDa	39	0	0	0
Proteasome subunit alpha type OS=Felis catus GN=PSMA6 PE=3 SV=1	tr|M3WV20|M3WV20_FELCA	27 kDa	38	0	0	0
Glutathione S-transferase OS=Felis catus GN=GSTM3 PE=3 SV=1	tr|M3WMX0|M3WMX0_FELCA	27 kDa	37	2	2	2
Serine and arginine rich splicing factor 1 OS=Felis catus GN=SRSF1 PE=4 SV=1	tr|M3VY56|M3VY56_FELCA	28 kDa	36	5	0	0
Annexin OS=Felis catus GN=ANXA4 PE=3 SV=1	tr|M3WIJ2|M3WIJ2_FELCA	36 kDa	36	7	0	0
Apolipoprotein A1 OS=Felis catus GN=APOA1 PE=3 SV=1	tr|M3WPG6|M3WPG6_FELCA	31 kDa	35	0	0	0
Tyrosine 3-monooxygenase/tryptophan 5-monooxygenase activation protein gamma OS=Felis catus GN=YWHAG PE=3 SV=1	tr|M3VWG1|M3VWG1_FELCA	28 kDa	33	0	0	0
Proteasome subunit alpha type OS=Felis catus GN=PSMA4 PE=3 SV=1	tr|M3VXJ6|M3VXJ6_FELCA	29 kDa	33	0	0	0
Proteasome subunit beta type OS=Felis catus GN=PSMB7 PE=3 SV=1	tr|M3WKX9|M3WKX9_FELCA	30 kDa	33	0	0	0
Triosephosphate isomerase OS=Felis catus GN=TPI1 PE=3 SV=1	tr|M3X9A1|M3X9A1_FELCA	30 kDa	33	0	0	0
Peroxiredoxin 6 OS=Felis catus GN=PRDX6 PE=4 SV=1	tr|M3X2Q5|M3X2Q5_FELCA	25 kDa	31	0	0	0
Proteasome subunit alpha type OS=Felis catus GN=PSMA3 PE=3 SV=1	tr|M3X983|M3X983_FELCA	29 kDa	31	0	0	0
Chromosome 14 open reading frame 166 OS=Felis catus GN=C14orf166 PE=4 SV=1	tr|M3VYX1|M3VYX1_FELCA	28 kDa	30	0	0	0
Actin, alpha, cardiac muscle 1 OS=Felis catus GN=ACTC1 PE=3 SV=1	tr|M3WK07|M3WK07_FELCA	42 kDa	30	136	48	42
Glyceraldehyde-3-phosphate dehydrogenase OS=Felis catus GN=GAPDH PE=3 SV=1	tr|A0A0A0MPZ5|A0A0A0MPZ5_FELCA	36 kDa	29	27	10	22
Proteasome endopeptidase complex OS=Felis catus PE=3 SV=1	tr|M3W006|M3W006_FELCA	24 kDa	29	0	0	0
60S ribosomal protein L6 OS=Felis catus GN=RPL6 PE=3 SV=1	tr|M3W6M1|M3W6M1_FELCA	33 kDa	29	22	19	12
Glutamine synthetase OS=Felis catus GN=GLUL PE=3 SV=1	tr|M3WDH0|M3WDH0_FELCA	45 kDa	29	81	29	8
Phosphoglycerate mutase OS=Felis catus GN=PGAM4 PE=3 SV=1	tr|M3WKJ9|M3WKJ9_FELCA	29 kDa	29	0	0	0
Carbonic anhydrase 3 OS=Felis catus GN=CA3 PE=4 SV=1	tr|M3WS40|M3WS40_FELCA	30 kDa	29	0	0	0
Dimethylarginine dimethylaminohydrolase 2 OS=Felis catus GN=DDAH2 PE=4 SV=1	tr|M3XC02|M3XC02_FELCA	30 kDa	29	0	0	0
Heat shock protein 27 kDa beta-1 OS=Felis catus GN=HSPB1 PE=3 SV=1	tr|M3WWP2|M3WWP2_FELCA	23 kDa	28	4	2	0
Four and a half LIM domains 1 OS=Felis catus GN=FHL1 PE=4 SV=1	tr|M3XCC0|M3XCC0_FELCA	32 kDa	28	3	0	0
Tyrosine 3-monooxygenase/tryptophan 5-monooxygenase activation protein eta OS=Felis catus GN=YWHAH PE=3 SV=1	tr|M3VV31|M3VV31_FELCA	25 kDa	27	0	0	0
Uncharacterized protein OS=Felis catus PE=3 SV=1	tr|M3W8B6|M3W8B6_FELCA	25 kDa	27	0	0	0
L-lactate dehydrogenase OS=Felis catus GN=LDHB PE=3 SV=1	tr|M3WHA8|M3WHA8_FELCA	37 kDa	27	23	4	7
Ribosomal protein L15 OS=Felis catus GN=RPL15 PE=3 SV=1	tr|M3X6G6|M3X6G6_FELCA	24 kDa	27	14	7	9
40S ribosomal protein S8 OS=Felis catus GN=RPS8 PE=3 SV=1	tr|M3XA78|M3XA78_FELCA	24 kDa	27	11	8	7
Uncharacterized protein OS=Felis catus PE=3 SV=1	tr|M3X4M6|M3X4M6_FELCA	32 kDa	26	11	12	15
Rho GDP dissociation inhibitor alpha OS=Felis catus GN=ARHGDIA PE=4 SV=1	tr|M3WQS4|M3WQS4_FELCA	23 kDa	25	0	0	0
Proteasome subunit alpha type OS=Felis catus GN=PSMA5 PE=3 SV=1	tr|M3WR82|M3WR82_FELCA	26 kDa	25	0	0	0
Uncharacterized protein OS=Felis catus GN=HMGB1 PE=4 SV=1	tr|M3VUA1|M3VUA1_FELCA	25 kDa	24	0	0	0
Proteasome subunit alpha type OS=Felis catus GN=PSMA1 PE=3 SV=1	tr|M3WF05|M3WF05_FELCA	29 kDa	24	3	0	0
Vimentin OS=Felis catus GN=VIM PE=3 SV=1	tr|M3WJ26|M3WJ26_FELCA	54 kDa	24	49	11	16
Annexin OS=Felis catus GN=ANXA1 PE=3 SV=1	tr|M3WM96|M3WM96_FELCA	28 kDa	24	22	9	13
Ribosomal protein L5 OS=Felis catus GN=RPL5 PE=3 SV=1	tr|M3WUK3|M3WUK3_FELCA	34 kDa	24	7	0	0
RAS like proto-oncogene B OS=Felis catus GN=RALB PE=4 SV=1	tr|M3WYA0|M3WYA0_FELCA	23 kDa	23	0	0	0
Tubulin beta chain OS=Felis catus PE=3 SV=1	tr|M3W0Z9|M3W0Z9_FELCA	50 kDa	22	38	63	53
Ras suppressor protein 1 OS=Felis catus GN=RSU1 PE=4 SV=1	tr|M3WJ24|M3WJ24_FELCA	32 kDa	22	0	0	0
Tubulin beta chain OS=Felis catus GN=TUBB PE=3 SV=1	tr|M3X7Z9|M3X7Z9_FELCA	50 kDa	22	39	64	58
RAS like proto-oncogene A OS=Felis catus GN=RALA PE=4 SV=1	tr|M3WV28|M3WV28_FELCA	24 kDa	21	0	0	0
Sepiapterin reductase (7,8-dihydrobiopterin:NADP+ oxidoreductase) OS=Felis catus GN=SPR PE=4 SV=1	tr|M3WWH9|M3WWH9_FELCA	29 kDa	21	0	0	0
RAB5B, member RAS oncogene family OS=Felis catus GN=RAB5B PE=4 SV=1	tr|M3WJU7|M3WJU7_FELCA	27 kDa	20	0	0	0
Carbonic anhydrase 2 OS=Felis catus GN=CA2 PE=4 SV=1	tr|M3W3J4|M3W3J4_FELCA	29 kDa	19	0	0	0
Ribosomal protein L14 OS=Felis catus GN=RPL14 PE=4 SV=1	tr|M3WN06|M3WN06_FELCA	23 kDa	19	7	9	11
Ribosomal protein L8 OS=Felis catus GN=RPL8 PE=3 SV=1	tr|M3WRT2|M3WRT2_FELCA	28 kDa	19	16	20	13
S-methyl-5'-thioadenosine phosphorylase OS=Felis catus GN=MTAP PE=3 SV=1	tr|M3WS42|M3WS42_FELCA	30 kDa	19	0	0	0
Stomatin OS=Felis catus GN=STOM PE=4 SV=1	tr|M3XCB8|M3XCB8_FELCA	31 kDa	19	0	0	2
RAB5C, member RAS oncogene family OS=Felis catus GN=RAB5C PE=4 SV=1	tr|M3VXZ7|M3VXZ7_FELCA	23 kDa	18	0	0	0
Quinoid dihydropteridine reductase OS=Felis catus GN=QDPR PE=4 SV=1	tr|M3VZ80|M3VZ80_FELCA	26 kDa	18	0	0	0
Ezrin OS=Felis catus GN=EZR PE=4 SV=1	tr|M3W8S0|M3W8S0_FELCA	71 kDa	18	20	55	22
Dolichyl-phosphate mannosyltransferase subunit 1, catalytic OS=Felis catus GN=DPM1 PE=4 SV=1	tr|M3WC50|M3WC50_FELCA	33 kDa	18	0	0	0
Uncharacterized protein OS=Felis catus GN=GSTP1 PE=4 SV=1	tr|M3VX82|M3VX82_FELCA	24 kDa	17	0	0	0
40S ribosomal protein S6 OS=Felis catus GN=RPS6 PE=3 SV=1	tr|M3VYQ2|M3VYQ2_FELCA	28 kDa	17	7	7	5
RAB5A, member RAS oncogene family OS=Felis catus GN=RAB5A PE=4 SV=1	tr|M3W279|M3W279_FELCA	27 kDa	17	0	0	0
Coatomer subunit epsilon OS=Felis catus GN=COPE PE=3 SV=1	tr|M3WC23|M3WC23_FELCA	34 kDa	17	0	0	0
Synaptosomal-associated protein OS=Felis catus GN=SNAP23 PE=3 SV=1	tr|M3WIS2|M3WIS2_FELCA	25 kDa	17	0	0	0
Family with sequence similarity 3 member C OS=Felis catus GN=FAM3C PE=4 SV=1	tr|M3WVJ8|M3WVJ8_FELCA	25 kDa	17	0	0	0
Ribosomal protein S5 OS=Felis catus GN=RPS5 PE=3 SV=1	tr|M3X5Q3|M3X5Q3_FELCA	23 kDa	17	2	0	6
Proteasome subunit beta type OS=Felis catus GN=PSMB1 PE=3 SV=1	tr|M3X6T9|M3X6T9_FELCA	26 kDa	17	0	0	0
Calreticulin OS=Felis catus GN=CALR PE=3 SV=1	tr|M3VUU7|M3VUU7_FELCA	48 kDa	16	14	51	2
Transmembrane p24 trafficking protein 9 OS=Felis catus GN=TMED9 PE=3 SV=1	tr|M3W549|M3W549_FELCA	27 kDa	16	0	0	0
Family with sequence similarity 3 member D OS=Felis catus GN=FAM3D PE=4 SV=1	tr|M3W626|M3W626_FELCA	25 kDa	16	0	0	0
Eukaryotic translation elongation factor 1 beta 2 OS=Felis catus GN=EEF1B2 PE=3 SV=1	tr|M3WCX7|M3WCX7_FELCA	25 kDa	16	0	0	0
Annexin OS=Felis catus GN=ANXA6 PE=3 SV=1	tr|M3WWE9|M3WWE9_FELCA	76 kDa	16	16	63	6
Galectin OS=Felis catus GN=LGALS3 PE=4 SV=1	tr|M3WXZ9|M3WXZ9_FELCA	29 kDa	16	3	0	0
Glucosamine-6-phosphate isomerase OS=Felis catus GN=GNPDA2 PE=3 SV=1	tr|M3X7J4|M3X7J4_FELCA	31 kDa	16	0	0	0
Proteasome subunit beta OS=Felis catus GN=PSMB4 PE=3 SV=1	tr|M3VXE9|M3VXE9_FELCA	29 kDa	15	0	0	0
Transmembrane p24 trafficking protein 4 OS=Felis catus GN=TMED4 PE=3 SV=1	tr|M3WCZ0|M3WCZ0_FELCA	27 kDa	15	0	0	0
Ribosomal protein S9 OS=Felis catus GN=RPS9 PE=3 SV=1	tr|M3WJZ7|M3WJZ7_FELCA	23 kDa	15	14	6	11
Phosphoglycerate mutase OS=Felis catus GN=PGAM2 PE=3 SV=1	tr|M3WYZ8|M3WYZ8_FELCA	29 kDa	15	0	0	0
Translin OS=Felis catus GN=TSN PE=4 SV=1	tr|M3X4R2|M3X4R2_FELCA	26 kDa	15	0	0	0
Proteasome subunit alpha type OS=Felis catus GN=PSMA2 PE=3 SV=1	tr|M3XAA2|M3XAA2_FELCA	26 kDa	15	0	0	0
Uncharacterized protein OS=Felis catus PE=4 SV=1	tr|M3XG21|M3XG21_FELCA	26 kDa	15	0	2	4
NADH-cytochrome b5 reductase OS=Felis catus GN=CYB5R3 PE=3 SV=1	tr|M3XGA7|M3XGA7_FELCA	32 kDa	15	4	0	0
Malate dehydrogenase, cytoplasmic OS=Felis catus GN=MDH1 PE=2 SV=3	sp|Q7YRU4|MDHC_FELCA	36 kDa	14	3	0	0
TMED7-TICAM2 readthrough OS=Felis catus GN=TMED7-TICAM2 PE=3 SV=1	tr|M3VXT2|M3VXT2_FELCA	41 kDa	14	0	0	0
Uncharacterized protein OS=Felis catus GN=TPM3 PE=3 SV=1	tr|M3WH86|M3WH86_FELCA	33 kDa	14	0	0	0
Calpain small subunit 1 OS=Felis catus GN=CAPNS1 PE=4 SV=1	tr|M3WK60|M3WK60_FELCA	28 kDa	14	0	0	0
Progesterone receptor membrane component 1 OS=Felis catus GN=PGRMC1 PE=3 SV=1	tr|M3WUA3|M3WUA3_FELCA	22 kDa	14	3	0	2
Chloride intracellular channel protein OS=Felis catus GN=CLIC4 PE=3 SV=1	tr|M3WWJ9|M3WWJ9_FELCA	26 kDa	14	0	0	0
RAB21, member RAS oncogene family OS=Felis catus GN=RAB21 PE=4 SV=1	tr|M3WZY9|M3WZY9_FELCA	24 kDa	14	0	0	0
SEC22 homolog B, vesicle trafficking protein (gene/pseudogene) OS=Felis catus GN=SEC22B PE=3 SV=1	tr|M3X0S7|M3X0S7_FELCA	25 kDa	14	0	0	0
G protein subunit beta 2 OS=Felis catus GN=GNB2 PE=4 SV=1	tr|M3X5T9|M3X5T9_FELCA	37 kDa	14	11	5	4
Cysteine rich secretory protein 2 OS=Felis catus GN=CRISP2 PE=3 SV=1	tr|M3XFM3|M3XFM3_FELCA	27 kDa	14	0	0	0
Uncharacterized protein OS=Felis catus GN=LOC102899262 PE=3 SV=1	tr|M3VWH3|M3VWH3_FELCA (+1)	30 kDa	13	0	0	0
Peroxiredoxin 4 OS=Felis catus GN=PRDX4 PE=4 SV=1	tr|M3W1F3|M3W1F3_FELCA	31 kDa	13	0	0	0
Uncharacterized protein OS=Felis catus GN=PSME1 PE=4 SV=1	tr|M3W4B6|M3W4B6_FELCA	29 kDa	13	0	3	0
Epididymal sperm binding protein 1 OS=Felis catus GN=ELSPBP1 PE=4 SV=1	tr|M3WDK8|M3WDK8_FELCA	29 kDa	13	4	2	0
Ras-related C3 botulinum toxin substrate 1 (rho family, small GTP binding protein Rac1) OS=Felis catus GN=RAC1 PE=3 SV=1	tr|M3WEZ2|M3WEZ2_FELCA	24 kDa	13	0	0	0
Tubulin alpha chain OS=Felis catus GN=TUBA1B PE=3 SV=1	tr|M3WFX6|M3WFX6_FELCA	50 kDa	13	27	35	36
Tetraspanin OS=Felis catus GN=TSPAN8 PE=3 SV=1	tr|M3WJQ8|M3WJQ8_FELCA	26 kDa	13	2	0	0
Uncharacterized protein OS=Felis catus PE=4 SV=1	tr|M3WPZ3|M3WPZ3_FELCA	12 kDa	13	0	0	0
Adenylate kinase isoenzyme 1 OS=Felis catus GN=AK1 PE=3 SV=1	tr|M3WX07|M3WX07_FELCA	23 kDa	13	0	0	0
EH domain containing 2 OS=Felis catus GN=EHD2 PE=3 SV=1	tr|M3X0Y6|M3X0Y6_FELCA	61 kDa	13	27	20	7
Proteasome subunit alpha type OS=Felis catus GN=PSMA8 PE=3 SV=1	tr|M3XET1|M3XET1_FELCA	28 kDa	13	0	0	0
3-hydroxybutyrate dehydrogenase 2 OS=Felis catus GN=BDH2 PE=4 SV=1	tr|M3XGD5|M3XGD5_FELCA	27 kDa	13	0	0	0
Prohibitin OS=Felis catus GN=PHB PE=2 SV=1	tr|A8WA76|A8WA76_FELCA	30 kDa	12	0	0	0
S100 calcium binding protein A8 OS=Felis catus GN=S100A8 PE=3 SV=1	tr|M3VWD6|M3VWD6_FELCA	9 kDa	12	0	0	0
Ribosomal protein L13a OS=Felis catus GN=RPL13A PE=3 SV=1	tr|M3WAY9|M3WAY9_FELCA	23 kDa	12	0	0	2
Enolase 1 OS=Felis catus GN=ENO1 PE=3 SV=1	tr|M3WCP0|M3WCP0_FELCA	47 kDa	12	53	41	2
Family with sequence similarity 3 member A OS=Felis catus GN=FAM3A PE=4 SV=1	tr|M3WF20|M3WF20_FELCA	25 kDa	12	0	0	0
Dicarbonyl and L-xylulose reductase OS=Felis catus GN=DCXR PE=4 SV=1	tr|M3WFI7|M3WFI7_FELCA	26 kDa	12	0	0	0
Uncharacterized protein OS=Felis catus GN=RPS3 PE=3 SV=1	tr|M3WG22|M3WG22_FELCA	27 kDa	12	3	3	8
60S acidic ribosomal protein P0 OS=Felis catus GN=RPLP0 PE=3 SV=1	tr|M3WIQ1|M3WIQ1_FELCA	34 kDa	12	5	0	0
L-lactate dehydrogenase OS=Felis catus GN=LDHA PE=3 SV=1	tr|M3WN67|M3WN67_FELCA	40 kDa	12	0	0	0
Calcyphosine OS=Felis catus GN=CAPS PE=4 SV=1	tr|M3WRR4|M3WRR4_FELCA	21 kDa	12	3	4	9
Uncharacterized protein OS=Felis catus PE=4 SV=1	tr|M3WRW5|M3WRW5_FELCA (+1)	26 kDa	12	0	0	0
Glutathione S-transferase omega 1 OS=Felis catus GN=GSTO1 PE=4 SV=1	tr|M3WTU7|M3WTU7_FELCA	27 kDa	12	0	0	0
Ras homolog family member A OS=Felis catus GN=RHOA PE=3 SV=1	tr|M3WU80|M3WU80_FELCA	22 kDa	12	0	0	0
Sulfotransferase OS=Felis catus GN=LOC101088902 PE=3 SV=1	tr|M3WW93|M3WW93_FELCA	34 kDa	12	0	0	0
Lactoylglutathione lyase OS=Felis catus GN=GLO1 PE=3 SV=1	tr|M3X4B1|M3X4B1_FELCA	21 kDa	12	0	0	0
Peroxiredoxin 1 OS=Felis catus GN=PRDX1 PE=4 SV=1	tr|M3XBK1|M3XBK1_FELCA	22 kDa	12	11	3	10
Progesterone receptor membrane component 2 OS=Felis catus GN=PGRMC2 PE=3 SV=1	tr|M3XE48|M3XE48_FELCA	23 kDa	12	0	0	0
Hydroxysteroid 17-beta dehydrogenase 12 OS=Felis catus GN=HSD17B12 PE=3 SV=1	tr|M3XF85|M3XF85_FELCA	34 kDa	12	0	0	0
Peptidyl-prolyl cis-trans isomerase OS=Felis catus GN=PPIB PE=2 SV=1	tr|G3XEW6|G3XEW6_FELCA	24 kDa	11	0	0	0
Chaperonin containing TCP1 subunit 2 OS=Felis catus GN=CCT2 PE=3 SV=1	tr|M3VWY7|M3VWY7_FELCA	57 kDa	11	17	57	25
RAB1A, member RAS oncogene family OS=Felis catus GN=RAB1A PE=4 SV=1	tr|M3VYP9|M3VYP9_FELCA	23 kDa	11	0	0	0
Uncharacterized protein OS=Felis catus PE=4 SV=1	tr|M3W1H0|M3W1H0_FELCA	11 kDa	11	0	3	5
Glutathione S-transferase alpha 4 OS=Felis catus GN=GSTA4 PE=4 SV=1	tr|M3W3Q1|M3W3Q1_FELCA	26 kDa	11	0	0	0
Golgi SNAP receptor complex member 1 OS=Felis catus GN=GOSR1 PE=3 SV=1	tr|M3W5L4|M3W5L4_FELCA	29 kDa	11	0	0	0
Enoyl-CoA delta isomerase 1 OS=Felis catus GN=ECI1 PE=3 SV=1	tr|M3W858|M3W858_FELCA	33 kDa	11	0	0	0
Ribosomal protein S16 OS=Felis catus GN=RPS16 PE=3 SV=1	tr|M3WDU7|M3WDU7_FELCA	18 kDa	11	9	4	10
Coatomer subunit delta OS=Felis catus GN=ARCN1 PE=3 SV=1	tr|M3WFS6|M3WFS6_FELCA	57 kDa	11	4	24	0
Uncharacterized protein OS=Felis catus GN=LOC101094346 PE=4 SV=1	tr|M3WPJ9|M3WPJ9_FELCA	193 kDa	11	31	14	30
Serine and arginine rich splicing factor 7 OS=Felis catus GN=SRSF7 PE=4 SV=1	tr|M3WYE6|M3WYE6_FELCA	27 kDa	11	2	0	0
Proteasome subunit beta type OS=Felis catus GN=PSMB5 PE=3 SV=1	tr|M3X375|M3X375_FELCA	28 kDa	11	0	0	0
Carboxymethylenebutenolidase homolog OS=Felis catus GN=CMBL PE=4 SV=1	tr|M3X3U3|M3X3U3_FELCA	28 kDa	11	0	0	0
Serine and arginine rich splicing factor 6 OS=Felis catus GN=SRSF6 PE=4 SV=1	tr|M3X4Y6|M3X4Y6_FELCA	39 kDa	11	13	5	3
Ferritin heavy chain OS=Felis catus GN=FTH1 PE=2 SV=3	sp|Q2MHN2|FRIH_FELCA	21 kDa	10	0	0	0
Elongation factor 1-alpha 1 OS=Felis catus GN=EEF1A1 PE=2 SV=1	sp|Q66RN5|EF1A1_FELCA	50 kDa	10	16	12	13
Heterogeneous nuclear ribonucleoprotein H1 OS=Felis catus GN=HNRNPH1 PE=4 SV=1	tr|M3VW73|M3VW73_FELCA	51 kDa	10	12	9	11
Arp2/3 complex 34 kDa subunit OS=Felis catus PE=3 SV=1	tr|M3VYD8|M3VYD8_FELCA	43 kDa	10	0	0	0
Ribosomal protein L28 OS=Felis catus GN=RPL28 PE=4 SV=1	tr|M3W4G0|M3W4G0_FELCA	16 kDa	10	10	5	5
Annexin OS=Felis catus GN=ANXA7 PE=3 SV=1	tr|M3W9B7|M3W9B7_FELCA	53 kDa	10	25	3	0
Succinate dehydrogenase [ubiquinone] iron-sulfur subunit, mitochondrial OS=Felis catus GN=SDHB PE=3 SV=1	tr|M3WCU6|M3WCU6_FELCA	32 kDa	10	0	0	0
Heterogeneous nuclear ribonucleoprotein A3 OS=Felis catus GN=HNRNPA3 PE=4 SV=1	tr|M3WGE6|M3WGE6_FELCA	40 kDa	10	0	0	0
PTTG1 interacting protein OS=Felis catus GN=PTTG1IP PE=4 SV=1	tr|M3WIS3|M3WIS3_FELCA	19 kDa	10	0	0	0
RAB11B, member RAS oncogene family OS=Felis catus GN=RAB11B PE=4 SV=1	tr|M3WM66|M3WM66_FELCA (+1)	25 kDa	10	0	0	0
Golgi reassembly stacking protein 2 OS=Felis catus GN=GORASP2 PE=4 SV=1	tr|M3WQ88|M3WQ88_FELCA	47 kDa	10	0	16	0
Glutathione peroxidase OS=Felis catus GN=GPX5 PE=3 SV=1	tr|M3WSE2|M3WSE2_FELCA	25 kDa	10	0	0	0
Uncharacterized protein OS=Felis catus PE=4 SV=1	tr|M3WSZ1|M3WSZ1_FELCA	24 kDa	10	0	0	0
DCN1-like protein OS=Felis catus GN=DCUN1D1 PE=4 SV=1	tr|M3WTK7|M3WTK7_FELCA	33 kDa	10	0	0	0
GTP-binding nuclear protein Ran OS=Felis catus GN=RAN PE=3 SV=1	tr|M3WXV4|M3WXV4_FELCA	23 kDa	10	0	0	0
Isochorismatase domain containing 1 OS=Felis catus GN=ISOC1 PE=4 SV=1	tr|M3X1J3|M3X1J3_FELCA	22 kDa	10	0	0	0
Uncharacterized protein OS=Felis catus GN=LOC102899262 PE=3 SV=1	tr|M3XF95|M3XF95_FELCA	30 kDa	10	0	0	0
Hemoglobin subunit beta-A/B OS=Felis catus GN=HBB PE=1 SV=1	sp|P07412|HBB_FELCA	16 kDa	9	0	0	0
40S ribosomal protein S3a (Fragment) OS=Felis catus GN=RPS3A PE=2 SV=1	sp|P61246|RS3A_FELCA (+1)	30 kDa	9	10	9	13
Hydroxysteroid 17-beta dehydrogenase 6 OS=Felis catus GN=HSD17B6 PE=3 SV=1	tr|M3VVL6|M3VVL6_FELCA	36 kDa	9	0	0	0
Uncharacterized protein OS=Felis catus GN=PAFAH1B3 PE=4 SV=1	tr|M3W0M0|M3W0M0_FELCA	26 kDa	9	0	0	0
Ribonuclease A family member 10 (inactive) OS=Felis catus GN=RNASE10 PE=3 SV=1	tr|M3W6S6|M3W6S6_FELCA	24 kDa	9	7	0	0
Adenosylhomocysteinase OS=Felis catus GN=AHCY PE=3 SV=1	tr|M3W7H0|M3W7H0_FELCA	48 kDa	9	56	12	4
Casein kinase II subunit beta OS=Felis catus GN=CSNK2B PE=3 SV=1	tr|M3W831|M3W831_FELCA	25 kDa	9	0	0	0
Uncharacterized protein OS=Felis catus GN=RPL18 PE=4 SV=1	tr|M3W9Y8|M3W9Y8_FELCA	22 kDa	9	7	8	2
Aldehyde dehydrogenase 1 family member A1 OS=Felis catus GN=ALDH1A1 PE=3 SV=1	tr|M3WAV4|M3WAV4_FELCA	55 kDa	9	38	75	13
Fatty acid synthase OS=Felis catus GN=FASN PE=4 SV=1	tr|M3WFK0|M3WFK0_FELCA	263 kDa	9	6	6	51
Uncharacterized protein OS=Felis catus GN=RPL4 PE=4 SV=1	tr|M3WGN8|M3WGN8_FELCA	47 kDa	9	44	21	35
Peptidylprolyl isomerase OS=Felis catus GN=FKBP7 PE=4 SV=1	tr|M3WH52|M3WH52_FELCA	27 kDa	9	0	0	0
Chloride intracellular channel protein OS=Felis catus GN=CLIC1 PE=3 SV=1	tr|M3WNY6|M3WNY6_FELCA	27 kDa	9	0	0	0
Parkinsonism associated deglycase OS=Felis catus GN=PARK7 PE=4 SV=1	tr|M3WYR7|M3WYR7_FELCA	17 kDa	9	0	0	0
Uncharacterized protein OS=Felis catus PE=4 SV=1	tr|M3X1A4|M3X1A4_FELCA	41 kDa	9	20	29	19
LDL receptor related protein associated protein 1 OS=Felis catus GN=LRPAP1 PE=4 SV=1	tr|M3X1T7|M3X1T7_FELCA	34 kDa	9	51	6	0
Voltage dependent anion channel 2 OS=Felis catus GN=VDAC2 PE=4 SV=1	tr|M3X2J1|M3X2J1_FELCA	32 kDa	9	0	0	0
Rho GDP dissociation inhibitor beta OS=Felis catus GN=ARHGDIB PE=4 SV=1	tr|M3X317|M3X317_FELCA	23 kDa	9	0	0	0
Nipsnap homolog 3A OS=Felis catus GN=NIPSNAP3A PE=4 SV=1	tr|M3X7M3|M3X7M3_FELCA	28 kDa	9	0	0	0
Syndecan binding protein OS=Felis catus GN=SDCBP PE=4 SV=1	tr|M3X7T2|M3X7T2_FELCA	32 kDa	9	0	0	0
COP9 signalosome subunit 7A OS=Felis catus GN=COPS7A PE=4 SV=1	tr|M3XEA0|M3XEA0_FELCA	30 kDa	9	0	0	0
Uncharacterized protein OS=Felis catus GN=RAP1B PE=4 SV=1	tr|M3XEM4|M3XEM4_FELCA	21 kDa	9	0	0	0
Ferritin light chain OS=Felis catus GN=FTL PE=2 SV=3	sp|Q2MHN1|FRIL_FELCA	20 kDa	8	0	0	0
60S ribosomal protein L17 OS=Felis catus GN=RPL17 PE=2 SV=3	sp|Q5XTY7|RL17_FELCA	21 kDa	8	4	0	3
Alkaline phosphatase OS=Felis catus GN=ALPL PE=3 SV=1	tr|A0A0A0MPX9|A0A0A0MPX9_FELCA	56 kDa	8	9	7	16
Pyrroline-5-carboxylate reductase OS=Felis catus GN=PYCR3 PE=3 SV=1	tr|M3VVW6|M3VVW6_FELCA	29 kDa	8	0	0	0
Tumor protein, translationally-controlled 1 OS=Felis catus GN=TPT1 PE=3 SV=1	tr|M3VXX1|M3VXX1_FELCA	20 kDa	8	0	0	0
Nipsnap homolog 2 OS=Felis catus GN=NIPSNAP2 PE=4 SV=1	tr|M3VZI3|M3VZI3_FELCA	31 kDa	8	0	0	0
NSF attachment protein alpha OS=Felis catus GN=NAPA PE=4 SV=1	tr|M3W5E1|M3W5E1_FELCA	33 kDa	8	0	0	0
60S ribosomal protein L18a OS=Felis catus GN=RPL18A PE=3 SV=1	tr|M3W7V0|M3W7V0_FELCA	21 kDa	8	12	7	10
Proteasome subunit beta type OS=Felis catus GN=PSMB6 PE=3 SV=1	tr|M3W8U9|M3W8U9_FELCA	25 kDa	8	0	0	0
Capping actin protein of muscle Z-line beta subunit OS=Felis catus GN=CAPZB PE=4 SV=1	tr|M3WA78|M3WA78_FELCA	34 kDa	8	0	0	0
AP complex subunit beta OS=Felis catus GN=AP2B1 PE=3 SV=1	tr|M3WD64|M3WD64_FELCA (+1)	106 kDa	8	0	0	37
BCAS2, pre-mRNA processing factor OS=Felis catus GN=BCAS2 PE=4 SV=1	tr|M3WDE2|M3WDE2_FELCA	26 kDa	8	0	0	0
Uncharacterized protein OS=Felis catus PE=4 SV=1	tr|M3WF14|M3WF14_FELCA	26 kDa	8	11	8	17
Heat shock protein family A (Hsp70) member 5 OS=Felis catus GN=HSPA5 PE=3 SV=1	tr|M3WFT4|M3WFT4_FELCA	72 kDa	8	14	33	29
Aldo-keto reductase family 1 member B OS=Felis catus GN=AKR1B1 PE=4 SV=1	tr|M3WHU0|M3WHU0_FELCA	36 kDa	8	13	0	0
Mesoderm development candidate 2 OS=Felis catus GN=MESDC2 PE=4 SV=1	tr|M3WJS8|M3WJS8_FELCA	25 kDa	8	0	0	0
Retinol dehydrogenase 11 (all-trans/9-cis/11-cis) OS=Felis catus GN=RDH11 PE=3 SV=1	tr|M3WK22|M3WK22_FELCA	35 kDa	8	0	0	0
Enoyl-CoA hydratase, short chain 1 OS=Felis catus GN=ECHS1 PE=3 SV=1	tr|M3WM59|M3WM59_FELCA	29 kDa	8	0	0	0
Sorting nexin 2 OS=Felis catus GN=SNX2 PE=4 SV=1	tr|M3WP68|M3WP68_FELCA	56 kDa	8	0	0	0
Uncharacterized protein OS=Felis catus GN=LOC101092708 PE=4 SV=1	tr|M3WZ28|M3WZ28_FELCA	19 kDa	8	5	5	0
Hypoxanthine phosphoribosyltransferase 1 OS=Felis catus GN=HPRT1 PE=4 SV=1	tr|M3X1P4|M3X1P4_FELCA	25 kDa	8	0	0	0
SRP receptor beta subunit OS=Felis catus GN=SRPRB PE=4 SV=1	tr|M3X873|M3X873_FELCA	30 kDa	8	0	0	0
RAB, member of RAS oncogene family like 3 OS=Felis catus GN=RABL3 PE=4 SV=1	tr|M3XA72|M3XA72_FELCA	26 kDa	8	0	0	0
S-formylglutathione hydrolase OS=Felis catus GN=ESD PE=3 SV=1	tr|M3XAF3|M3XAF3_FELCA	32 kDa	8	0	0	0
Trans-2,3-enoyl-CoA reductase OS=Felis catus GN=TECR PE=4 SV=1	tr|M3XAV9|M3XAV9_FELCA	40 kDa	8	0	0	0
Growth factor receptor bound protein 2 OS=Felis catus GN=GRB2 PE=4 SV=1	tr|M3XAW3|M3XAW3_FELCA	25 kDa	8	0	0	0
Poly(rC) binding protein 2 OS=Felis catus GN=PCBP2 PE=4 SV=1	tr|M3XAZ8|M3XAZ8_FELCA	35 kDa	8	0	0	0
Heterogeneous nuclear ribonucleoprotein A2/B1 OS=Felis catus GN=HNRNPA2B1 PE=4 SV=1	tr|M3XCQ1|M3XCQ1_FELCA	37 kDa	8	0	0	0
Proteasome subunit beta type OS=Felis catus GN=PSMB2 PE=3 SV=1	tr|M3XCX1|M3XCX1_FELCA	23 kDa	8	0	0	0
Reticulocalbin 1 OS=Felis catus GN=RCN1 PE=4 SV=1	tr|M3XF37|M3XF37_FELCA	31 kDa	8	49	13	0
Annexin OS=Felis catus GN=ANXA11 PE=3 SV=1	tr|M3XFZ3|M3XFZ3_FELCA	54 kDa	8	16	36	5
Uncharacterized protein OS=Felis catus PE=3 SV=1	tr|M3VUN8|M3VUN8_FELCA	17 kDa	7	0	0	0
Complement C1q B chain OS=Felis catus GN=C1QB PE=4 SV=1	tr|M3VUY9|M3VUY9_FELCA	27 kDa	7	0	0	0
Nicotinamide N-methyltransferase OS=Felis catus GN=NNMT PE=4 SV=1	tr|M3VVS6|M3VVS6_FELCA	30 kDa	7	0	0	0
Uncharacterized protein OS=Felis catus GN=HSPA8 PE=3 SV=1	tr|M3VW17|M3VW17_FELCA	71 kDa	7	10	27	7
Catalase OS=Felis catus GN=CAT PE=3 SV=1	tr|M3VXR8|M3VXR8_FELCA	60 kDa	7	13	53	0
40S ribosomal protein SA OS=Felis catus GN=RPSA PE=3 SV=1	tr|M3VZ17|M3VZ17_FELCA	33 kDa	7	11	2	0
Electron transfer flavoprotein beta subunit OS=Felis catus GN=ETFB PE=2 SV=1	tr|M3VZA6|M3VZA6_FELCA	28 kDa	7	0	0	0
Uncharacterized protein OS=Felis catus GN=HNRNPL PE=4 SV=1	tr|M3VZV8|M3VZV8_FELCA	64 kDa	7	0	0	0
Protein S100 OS=Felis catus GN=S100A9 PE=3 SV=1	tr|M3VZX1|M3VZX1_FELCA	11 kDa	7	0	0	0
Phosphomannomutase OS=Felis catus GN=PMM2 PE=3 SV=1	tr|M3W1J4|M3W1J4_FELCA	28 kDa	7	0	0	0
Proteasome activator subunit 2 OS=Felis catus GN=PSME2 PE=4 SV=1	tr|M3W4B8|M3W4B8_FELCA	27 kDa	7	0	0	0
Ribosomal protein L3 OS=Felis catus GN=RPL3 PE=3 SV=1	tr|M3W4R9|M3W4R9_FELCA	48 kDa	7	25	11	16
NAD(P)H-hydrate epimerase OS=Felis catus GN=APOA1BP PE=3 SV=1	tr|M3W642|M3W642_FELCA	26 kDa	7	0	0	0
Small nuclear ribonucleoprotein U1 subunit 70 OS=Felis catus GN=SNRNP70 PE=4 SV=1	tr|M3W6B8|M3W6B8_FELCA	52 kDa	7	0	0	0
Nucleobindin 2 OS=Felis catus GN=NUCB2 PE=4 SV=1	tr|M3W7H2|M3W7H2_FELCA	55 kDa	7	11	11	0
Galectin OS=Felis catus GN=LGALS1 PE=4 SV=1	tr|M3W9D5|M3W9D5_FELCA	15 kDa	7	2	0	0
Uncharacterized protein OS=Felis catus GN=RPL27A PE=3 SV=1	tr|M3W9J7|M3W9J7_FELCA	17 kDa	7	8	5	9
Serine and arginine rich splicing factor 5 OS=Felis catus GN=SRSF5 PE=4 SV=1	tr|M3WAB9|M3WAB9_FELCA	31 kDa	7	3	0	0
Titin OS=Felis catus GN=TTN PE=4 SV=1	tr|M3WG03|M3WG03_FELCA	3715 kDa	7	7	0	0
Heme binding protein 1 OS=Felis catus GN=HEBP1 PE=4 SV=1	tr|M3WJW0|M3WJW0_FELCA	21 kDa	7	0	0	0
Radixin OS=Felis catus GN=RDX PE=4 SV=1	tr|M3WQU6|M3WQU6_FELCA	69 kDa	7	14	22	0
Ubiquitin carboxyl-terminal hydrolase OS=Felis catus GN=UCHL3 PE=3 SV=1	tr|M3WRI6|M3WRI6_FELCA	26 kDa	7	0	0	0
Ribosomal protein S27a OS=Felis catus GN=RPS27A PE=4 SV=1	tr|M3WWF6|M3WWF6_FELCA	18 kDa	7	10	7	11
Uncharacterized protein OS=Felis catus GN=LOC101094108 PE=4 SV=1	tr|M3WXU2|M3WXU2_FELCA	30 kDa	7	0	0	0
Related RAS viral (r-ras) oncogene homolog OS=Felis catus GN=RRAS PE=4 SV=1	tr|M3X277|M3X277_FELCA	23 kDa	7	0	0	0
Hydroxysteroid 17-beta dehydrogenase 11 OS=Felis catus GN=HSD17B11 PE=3 SV=1	tr|M3X4D0|M3X4D0_FELCA	33 kDa	7	0	0	0
RAB10, member RAS oncogene family OS=Felis catus GN=RAB10 PE=4 SV=1	tr|M3X579|M3X579_FELCA	23 kDa	7	0	0	2
Caveolae associated protein 1 OS=Felis catus GN=CAVIN1 PE=4 SV=1	tr|M3X6G1|M3X6G1_FELCA	43 kDa	7	5	16	0
Serine and arginine rich splicing factor 4 OS=Felis catus GN=SRSF4 PE=4 SV=1	tr|M3X8K9|M3X8K9_FELCA	45 kDa	7	0	7	4
Programmed cell death 10 OS=Felis catus GN=PDCD10 PE=4 SV=1	tr|M3X960|M3X960_FELCA	25 kDa	7	0	0	0
Platelet activating factor acetylhydrolase 1b catalytic subunit 2 OS=Felis catus GN=PAFAH1B2 PE=4 SV=1	tr|M3XFC9|M3XFC9_FELCA	26 kDa	7	0	0	0
F-actin-capping protein subunit alpha-2 OS=Felis catus GN=CAPZA2 PE=3 SV=1	sp|A0M8S9|CAZA2_FELCA (+1)	33 kDa	6	4	0	0
60S ribosomal protein L24 OS=Felis catus GN=RPL24 PE=2 SV=1	sp|Q66WF5|RL24_FELCA (+1)	18 kDa	6	3	0	0
Cysteine and glycine rich protein 1 OS=Felis catus GN=CSRP1 PE=4 SV=1	tr|M3VUS1|M3VUS1_FELCA	21 kDa	6	0	0	0
Uncharacterized protein OS=Felis catus GN=RACK1 PE=4 SV=1	tr|M3VZL6|M3VZL6_FELCA	35 kDa	6	0	0	0
Glutathione peroxidase OS=Felis catus GN=GPX6 PE=3 SV=1	tr|M3W083|M3W083_FELCA	25 kDa	6	0	0	0
High mobility group box 2 OS=Felis catus GN=HMGB2 PE=4 SV=1	tr|M3W1S7|M3W1S7_FELCA	24 kDa	6	0	0	0
Dihydropyrimidinase like 2 OS=Felis catus GN=DPYSL2 PE=4 SV=1	tr|M3W3W8|M3W3W8_FELCA	62 kDa	6	9	45	20
Serpin family F member 1 OS=Felis catus GN=SERPINF1 PE=3 SV=1	tr|M3W5N1|M3W5N1_FELCA	46 kDa	6	26	6	0
Protein disulfide-isomerase OS=Felis catus GN=PDIA3 PE=3 SV=1	tr|M3W668|M3W668_FELCA	57 kDa	6	37	84	17
Uncharacterized protein OS=Felis catus PE=3 SV=1	tr|M3W704|M3W704_FELCA	35 kDa	6	0	0	0
Dihydropyrimidinase like 3 OS=Felis catus GN=DPYSL3 PE=4 SV=1	tr|M3W984|M3W984_FELCA	62 kDa	6	11	52	15
Uncharacterized protein OS=Felis catus PE=3 SV=1	tr|M3WAB5|M3WAB5_FELCA	16 kDa	6	5	3	7
Eukaryotic translation elongation factor 1 gamma OS=Felis catus GN=EEF1G PE=4 SV=1	tr|M3WAC5|M3WAC5_FELCA	56 kDa	6	26	8	10
Ribosomal protein S11 OS=Felis catus GN=RPS11 PE=3 SV=1	tr|M3WAZ1|M3WAZ1_FELCA	18 kDa	6	9	5	15
Uncharacterized protein OS=Felis catus PE=4 SV=1	tr|M3WBE2|M3WBE2_FELCA	25 kDa	6	0	0	0
Uncharacterized protein OS=Felis catus GN=EIF4E PE=3 SV=1	tr|M3WCF3|M3WCF3_FELCA	25 kDa	6	0	0	0
Uncharacterized protein OS=Felis catus GN=HNRNPA1 PE=4 SV=1	tr|M3WCS4|M3WCS4_FELCA	39 kDa	6	0	0	0
Uncharacterized protein OS=Felis catus GN=LOC101080269 PE=4 SV=1	tr|M3WDI0|M3WDI0_FELCA	46 kDa	6	0	0	0
Talin 1 OS=Felis catus GN=TLN1 PE=4 SV=1	tr|M3WHI4|M3WHI4_FELCA	270 kDa	6	13	0	33
Hydroxypyruvate isomerase (putative) OS=Felis catus GN=HYI PE=4 SV=1	tr|M3WLZ2|M3WLZ2_FELCA	23 kDa	6	0	0	0
Heterogeneous nuclear ribonucleoprotein M OS=Felis catus GN=HNRNPM PE=4 SV=1	tr|M3WM68|M3WM68_FELCA	78 kDa	6	0	9	3
Eukaryotic translation initiation factor 3 subunit C OS=Felis catus GN=LOC101090225 PE=3 SV=1	tr|M3WN96|M3WN96_FELCA	106 kDa	6	6	4	53
IST1, ESCRT-III associated factor OS=Felis catus GN=IST1 PE=4 SV=1	tr|M3WQF1|M3WQF1_FELCA	40 kDa	6	0	0	0
Armadillo repeat containing 10 OS=Felis catus GN=ARMC10 PE=4 SV=1	tr|M3WQI8|M3WQI8_FELCA	34 kDa	6	0	0	0
Poly(rC) binding protein 1 OS=Felis catus GN=PCBP1 PE=4 SV=1	tr|M3WS36|M3WS36_FELCA	36 kDa	6	4	0	2
Pyrophosphatase (inorganic) 1 OS=Felis catus GN=PPA1 PE=4 SV=1	tr|M3WTQ9|M3WTQ9_FELCA	30 kDa	6	0	0	0
Uncharacterized protein OS=Felis catus PE=4 SV=1	tr|M3WUE7|M3WUE7_FELCA	27 kDa	6	0	0	0
Ribosomal protein L11 OS=Felis catus GN=RPL11 PE=3 SV=1	tr|M3WUL6|M3WUL6_FELCA	20 kDa	6	3	0	5
Uncharacterized protein OS=Felis catus GN=GOSR2 PE=3 SV=1	tr|M3WVH6|M3WVH6_FELCA	25 kDa	6	0	0	0
Uncharacterized protein OS=Felis catus PE=4 SV=1	tr|M3WYA8|M3WYA8_FELCA	24 kDa	6	0	0	7
Pentaxin OS=Felis catus GN=CRP PE=3 SV=1	tr|M3WZ75|M3WZ75_FELCA	25 kDa	6	0	0	0
Uncharacterized protein OS=Felis catus PE=4 SV=1	tr|M3X0T7|M3X0T7_FELCA	12 kDa	6	0	0	0
Isoamyl acetate-hydrolyzing esterase 1 homolog OS=Felis catus GN=IAH1 PE=4 SV=1	tr|M3X0X4|M3X0X4_FELCA	28 kDa	6	0	0	0
Uncharacterized protein OS=Felis catus PE=4 SV=1	tr|M3X5A5|M3X5A5_FELCA	14 kDa	6	0	0	0
60S ribosomal protein L29 OS=Felis catus GN=RPL29 PE=3 SV=1	tr|M3X8C2|M3X8C2_FELCA	18 kDa	6	3	0	2
Uncharacterized protein OS=Felis catus PE=4 SV=1	tr|M3XCT3|M3XCT3_FELCA	14 kDa	6	0	0	0
Pyruvate kinase OS=Felis catus GN=PKM PE=3 SV=1	tr|S4R157|S4R157_FELCA	58 kDa	6	32	64	39
Complement C1q C chain OS=Felis catus GN=C1QC PE=4 SV=1	tr|M3VUY8|M3VUY8_FELCA	22 kDa	5	0	0	0
Dolichyl-diphosphooligosaccharide--protein glycosyltransferase 48 kDa subunit OS=Felis catus GN=DDOST PE=3 SV=1	tr|M3VVE9|M3VVE9_FELCA	49 kDa	5	26	7	0
Proteasome 26S subunit, non-ATPase 8 OS=Felis catus GN=PSMD8 PE=4 SV=1	tr|M3VVH1|M3VVH1_FELCA (+1)	39 kDa	5	0	0	0
Valosin containing protein OS=Felis catus GN=VCP PE=3 SV=1	tr|M3VW05|M3VW05_FELCA	81 kDa	5	17	14	84
Solute carrier family 25 member 6 OS=Felis catus GN=SLC25A6 PE=3 SV=1	tr|M3VW78|M3VW78_FELCA	29 kDa	5	0	0	0
Methylthioribulose-1-phosphate dehydratase OS=Felis catus GN=APIP PE=3 SV=1	tr|M3VYQ9|M3VYQ9_FELCA	27 kDa	5	0	0	0
Dynactin subunit 3 OS=Felis catus GN=DCTN3 PE=4 SV=1	tr|M3VZT7|M3VZT7_FELCA	22 kDa	5	0	0	0
Adhesion regulating molecule 1 OS=Felis catus GN=ADRM1 PE=4 SV=1	tr|M3W008|M3W008_FELCA	42 kDa	5	4	0	0
Transketolase OS=Felis catus GN=TKT PE=4 SV=1	tr|M3W162|M3W162_FELCA (+1)	68 kDa	5	10	32	4
Uncharacterized protein OS=Felis catus PE=3 SV=1	tr|M3W2V0|M3W2V0_FELCA	21 kDa	5	0	0	0
Uncharacterized protein OS=Felis catus GN=CDC42 PE=3 SV=1	tr|M3W2Z2|M3W2Z2_FELCA	21 kDa	5	0	0	0
Glucose-6-phosphate isomerase OS=Felis catus GN=GPI PE=3 SV=1	tr|M3W3S8|M3W3S8_FELCA	63 kDa	5	6	47	0
Translocon-associated protein subunit beta OS=Felis catus GN=SSR2 PE=3 SV=1	tr|M3W5W2|M3W5W2_FELCA	20 kDa	5	0	0	0
MICOS complex subunit OS=Felis catus GN=CHCHD3 PE=3 SV=1	tr|M3W6T8|M3W6T8_FELCA	26 kDa	5	0	0	0
G protein subunit alpha i2 OS=Felis catus GN=GNAI2 PE=4 SV=1	tr|M3W6X3|M3W6X3_FELCA	40 kDa	5	17	10	3
Solute carrier family 25 member 1 OS=Felis catus GN=SLC25A1 PE=3 SV=1	tr|M3WBM2|M3WBM2_FELCA	36 kDa	5	0	0	0
Voltage dependent anion channel 3 OS=Felis catus GN=VDAC3 PE=4 SV=1	tr|M3WCM7|M3WCM7_FELCA	31 kDa	5	0	0	0
Spectrin beta chain OS=Felis catus GN=SPTBN1 PE=3 SV=1	tr|M3WDK0|M3WDK0_FELCA	273 kDa	5	0	3	35
Endoplasmic reticulum-golgi intermediate compartment 1 OS=Felis catus GN=ERGIC1 PE=4 SV=1	tr|M3WER9|M3WER9_FELCA	35 kDa	5	0	0	0
BAI1 associated protein 2 OS=Felis catus GN=BAIAP2 PE=4 SV=1	tr|M3WF54|M3WF54_FELCA	59 kDa	5	0	0	0
Fructose-bisphosphate aldolase OS=Felis catus PE=3 SV=1	tr|M3WK75|M3WK75_FELCA	75 kDa	5	56	9	0
Proteasome subunit beta type OS=Felis catus GN=PSMB3 PE=3 SV=1	tr|M3WKT6|M3WKT6_FELCA	23 kDa	5	0	0	0
DnaJ heat shock protein family (Hsp40) member B6 OS=Felis catus GN=DNAJB6 PE=4 SV=1	tr|M3WN05|M3WN05_FELCA	36 kDa	5	0	0	0
G protein subunit alpha i3 OS=Felis catus GN=GNAI3 PE=4 SV=1	tr|M3WPU1|M3WPU1_FELCA	41 kDa	5	13	0	0
VAMP associated protein A OS=Felis catus GN=VAPA PE=4 SV=1	tr|M3WR51|M3WR51_FELCA	24 kDa	5	0	0	0
T-complex protein 1 subunit delta OS=Felis catus GN=CCT4 PE=3 SV=1	tr|M3WRA1|M3WRA1_FELCA	46 kDa	5	9	18	12
RAB7A, member RAS oncogene family OS=Felis catus GN=RAB7A PE=4 SV=1	tr|M3WRD9|M3WRD9_FELCA	23 kDa	5	0	0	0
Uncharacterized protein OS=Felis catus GN=LOC101084388 PE=3 SV=1	tr|M3WST5|M3WST5_FELCA (+1)	31 kDa	5	0	0	0
RAB14, member RAS oncogene family OS=Felis catus GN=RAB14 PE=4 SV=1	tr|M3WTD7|M3WTD7_FELCA	24 kDa	5	0	0	0
Eukaryotic translation initiation factor 3 subunit K OS=Felis catus GN=EIF3K PE=3 SV=1	tr|M3WUN8|M3WUN8_FELCA	25 kDa	5	0	0	0
Histamine N-methyltransferase OS=Felis catus GN=HNMT PE=4 SV=1	tr|M3WWQ6|M3WWQ6_FELCA	34 kDa	5	0	0	0
Sorcin OS=Felis catus GN=SRI PE=4 SV=1	tr|M3WWY9|M3WWY9_FELCA	22 kDa	5	0	0	0
Uncharacterized protein OS=Felis catus PE=4 SV=1	tr|M3WXH2|M3WXH2_FELCA	13 kDa	5	0	0	0
AP complex subunit beta OS=Felis catus GN=AP1B1 PE=3 SV=1	tr|M3WY66|M3WY66_FELCA	105 kDa	5	2	7	37
Lin-7 homolog C, crumbs cell polarity complex component OS=Felis catus GN=LIN7C PE=4 SV=1	tr|M3WYC4|M3WYC4_FELCA	22 kDa	5	0	0	0
Osteoclast stimulating factor 1 OS=Felis catus GN=OSTF1 PE=4 SV=1	tr|M3WZ14|M3WZ14_FELCA	23 kDa	5	0	0	0
Adenylate kinase 4, mitochondrial OS=Felis catus GN=AK4 PE=3 SV=1	tr|M3WZQ9|M3WZQ9_FELCA	25 kDa	5	0	0	0
NPC intracellular cholesterol transporter 2 OS=Felis catus GN=NPC2 PE=4 SV=1	tr|M3X1L5|M3X1L5_FELCA	16 kDa	5	0	0	0
Uncharacterized protein OS=Felis catus GN=RNASE12 PE=3 SV=1	tr|M3X5I9|M3X5I9_FELCA	17 kDa	5	0	0	0
Penta-EF-hand domain containing 1 OS=Felis catus GN=PEF1 PE=4 SV=1	tr|M3X8H7|M3X8H7_FELCA	30 kDa	5	0	0	0
Dephospho-CoA kinase domain containing OS=Felis catus GN=DCAKD PE=3 SV=1	tr|M3XDQ3|M3XDQ3_FELCA	26 kDa	5	0	0	0
Lectin, mannose binding 2 OS=Felis catus GN=LMAN2 PE=4 SV=1	tr|M3XF94|M3XF94_FELCA	40 kDa	5	2	0	0
Caveolin-1 OS=Felis catus GN=CAV1 PE=3 SV=1	sp|A0M8S7|CAV1_FELCA	21 kDa	4	0	0	0
Hemoglobin subunit alpha OS=Felis catus GN=HBA PE=1 SV=1	sp|P07405|HBA_FELCA (+1)	15 kDa	4	0	0	0
Peroxiredoxin 2 OS=Felis catus GN=PRDX2 PE=4 SV=1	tr|M3VUU2|M3VUU2_FELCA	22 kDa	4	0	0	0
Polypyrimidine tract binding protein 1 OS=Felis catus GN=PTBP1 PE=4 SV=1	tr|M3VW82|M3VW82_FELCA	56 kDa	4	3	15	0
Uncharacterized protein OS=Felis catus PE=4 SV=1	tr|M3VY77|M3VY77_FELCA	21 kDa	4	0	0	0
Catechol-O-methyltransferase OS=Felis catus GN=COMT PE=4 SV=1	tr|M3VYY7|M3VYY7_FELCA	30 kDa	4	0	0	0
RuvB-like helicase OS=Felis catus GN=RUVBL2 PE=3 SV=1	tr|M3W067|M3W067_FELCA	46 kDa	4	16	8	0
Uncharacterized protein OS=Felis catus PE=3 SV=1	tr|M3W0X6|M3W0X6_FELCA	17 kDa	4	0	0	0
Sorting nexin 1 OS=Felis catus GN=SNX1 PE=4 SV=1	tr|M3W1Q3|M3W1Q3_FELCA	59 kDa	4	0	0	0
Uncharacterized protein OS=Felis catus GN=LOC101091022 PE=3 SV=1	tr|M3W226|M3W226_FELCA	70 kDa	4	7	12	4
LY6/PLAUR domain containing 4 OS=Felis catus GN=LYPD4 PE=4 SV=1	tr|M3W2Y9|M3W2Y9_FELCA	27 kDa	4	0	0	0
Ribosomal protein S13 OS=Felis catus GN=RPS13 PE=3 SV=1	tr|M3W3Y8|M3W3Y8_FELCA (+1)	17 kDa	4	0	0	0
Protease, serine 37 OS=Felis catus GN=PRSS37 PE=4 SV=1	tr|M3W653|M3W653_FELCA	27 kDa	4	0	0	0
RNA polymerase II subunit E OS=Felis catus GN=POLR2E PE=4 SV=1	tr|M3W7I2|M3W7I2_FELCA	22 kDa	4	0	0	0
ATPase H+ transporting V1 subunit E1 OS=Felis catus GN=ATP6V1E1 PE=3 SV=1	tr|M3W8X9|M3W8X9_FELCA	26 kDa	4	0	0	0
Nudix hydrolase 21 OS=Felis catus GN=NUDT21 PE=4 SV=1	tr|M3WA00|M3WA00_FELCA	26 kDa	4	0	0	0
LRRN4 C-terminal like OS=Felis catus GN=LRRN4CL PE=4 SV=1	tr|M3WAD3|M3WAD3_FELCA	26 kDa	4	0	0	0
Vacuolar-sorting protein SNF8 OS=Felis catus GN=SNF8 PE=3 SV=1	tr|M3WAI0|M3WAI0_FELCA	29 kDa	4	0	0	0
S100 calcium binding protein A10 OS=Felis catus GN=S100A10 PE=3 SV=1	tr|M3WD86|M3WD86_FELCA	11 kDa	4	8	2	0
Uncharacterized protein OS=Felis catus GN=RPS15A PE=3 SV=1	tr|M3WDL6|M3WDL6_FELCA	15 kDa	4	2	0	0
Guanidinoacetate N-methyltransferase OS=Felis catus GN=GAMT PE=3 SV=1	tr|M3WDW2|M3WDW2_FELCA	26 kDa	4	0	0	0
Annexin OS=Felis catus GN=ANXA3 PE=3 SV=1	tr|M3WET7|M3WET7_FELCA	36 kDa	4	0	0	0
Rab GDP dissociation inhibitor OS=Felis catus GN=GDI2 PE=3 SV=1	tr|M3WHB4|M3WHB4_FELCA	48 kDa	4	54	15	0
CD109 molecule OS=Felis catus GN=CD109 PE=4 SV=1	tr|M3WHB7|M3WHB7_FELCA (+1)	162 kDa	4	0	0	17
Heat shock protein 90 beta family member 1 OS=Felis catus GN=HSP90B1 PE=3 SV=1	tr|M3WK11|M3WK11_FELCA	93 kDa	4	33	31	112
Dehydrogenase/reductase 7B OS=Felis catus GN=DHRS7B PE=3 SV=1	tr|M3WLF5|M3WLF5_FELCA	35 kDa	4	0	0	0
Heterogeneous nuclear ribonucleoprotein K OS=Felis catus GN=HNRNPK PE=4 SV=1	tr|M3WLH7|M3WLH7_FELCA	51 kDa	4	4	4	2
GLI pathogenesis related 1 like 1 OS=Felis catus GN=GLIPR1L1 PE=3 SV=1	tr|M3WLU8|M3WLU8_FELCA	27 kDa	4	0	0	0
GID complex subunit 8 homolog OS=Felis catus GN=GID8 PE=4 SV=1	tr|M3WMW2|M3WMW2_FELCA	27 kDa	4	0	0	0
Inter-alpha-trypsin inhibitor heavy chain family member 4 OS=Felis catus GN=ITIH4 PE=4 SV=1	tr|M3WN61|M3WN61_FELCA	106 kDa	4	3	9	33
Transgelin OS=Felis catus GN=TAGLN2 PE=3 SV=1	tr|M3WNB7|M3WNB7_FELCA	22 kDa	4	0	0	0
Vesicle transport through interaction with t-SNAREs 1A OS=Felis catus GN=VTI1A PE=4 SV=1	tr|M3WRH1|M3WRH1_FELCA	25 kDa	4	0	0	0
Solute carrier family 25 member 11 OS=Felis catus GN=SLC25A11 PE=3 SV=1	tr|M3WWX6|M3WWX6_FELCA	34 kDa	4	0	0	0
Uncharacterized protein OS=Felis catus PE=4 SV=1	tr|M3X050|M3X050_FELCA	12 kDa	4	0	0	0
Protein S100 OS=Felis catus GN=S100A11 PE=3 SV=1	tr|M3X1D4|M3X1D4_FELCA	11 kDa	4	0	0	0
Uncharacterized protein OS=Felis catus GN=LOC101098145 PE=4 SV=1	tr|M3X301|M3X301_FELCA	30 kDa	4	0	0	0
Cytochrome b-c1 complex subunit Rieske, mitochondrial OS=Felis catus GN=UQCRFS1 PE=4 SV=1	tr|M3X4Y3|M3X4Y3_FELCA	30 kDa	4	0	0	0
Inositol-1-monophosphatase OS=Felis catus GN=IMPA1 PE=3 SV=1	tr|M3X590|M3X590_FELCA	30 kDa	4	0	0	0
Solute carrier family 25 member 4 OS=Felis catus GN=SLC25A4 PE=3 SV=1	tr|M3X5F6|M3X5F6_FELCA	30 kDa	4	0	0	0
Nucleophosmin OS=Felis catus GN=NPM1 PE=4 SV=1	tr|M3X673|M3X673_FELCA	34 kDa	4	0	0	0
Uncharacterized protein OS=Felis catus PE=4 SV=1	tr|M3X7B7|M3X7B7_FELCA	15 kDa	4	0	0	0
B-cell receptor associated protein 29 OS=Felis catus GN=BCAP29 PE=4 SV=1	tr|M3X8G3|M3X8G3_FELCA	28 kDa	4	0	0	0
Ubiquitin thioesterase OS=Felis catus GN=OTUB1 PE=3 SV=1	tr|M3XBE5|M3XBE5_FELCA	32 kDa	4	0	0	0
Heterogeneous nuclear ribonucleoprotein F OS=Felis catus GN=HNRNPF PE=4 SV=1	tr|M3XBR2|M3XBR2_FELCA	46 kDa	4	10	0	0
Calnexin OS=Felis catus GN=CANX PE=3 SV=1	tr|M3XBV5|M3XBV5_FELCA	68 kDa	4	11	5	28
Eukaryotic translation elongation factor 1 delta OS=Felis catus GN=EEF1D PE=3 SV=1	tr|M3XFH0|M3XFH0_FELCA	70 kDa	4	4	0	0
Major prion protein OS=Felis catus GN=PRNP PE=1 SV=3	sp|O18754|PRIO_FELCA	28 kDa	3	0	0	0
Steroid 17-alpha-hydroxylase/17,20 lyase OS=Felis catus GN=CYP17A1 PE=2 SV=1	sp|Q9GMC8|CP17A_FELCA (+1)	58 kDa	3	40	14	14
Uncharacterized protein OS=Felis catus GN=KRT8 PE=3 SV=1	tr|M3VUH2|M3VUH2_FELCA	56 kDa	3	29	6	4
Proteasome 26S subunit, ATPase 4 OS=Felis catus GN=PSMC4 PE=3 SV=1	tr|M3VVV5|M3VVV5_FELCA	47 kDa	3	13	0	16
Uncharacterized protein OS=Felis catus GN=RPS25 PE=4 SV=1	tr|M3VW27|M3VW27_FELCA	14 kDa	3	0	0	0
ADP ribosylation factor related protein 1 OS=Felis catus GN=ARFRP1 PE=3 SV=1	tr|M3VW46|M3VW46_FELCA	23 kDa	3	0	0	0
Family with sequence similarity 3 member B OS=Felis catus GN=FAM3B PE=4 SV=1	tr|M3VXN0|M3VXN0_FELCA	26 kDa	3	0	0	0
Glutamyl-prolyl-tRNA synthetase OS=Felis catus GN=EPRS PE=3 SV=1	tr|M3VYT1|M3VYT1_FELCA	171 kDa	3	0	5	21
Uncharacterized protein OS=Felis catus GN=CAPG PE=4 SV=1	tr|M3W087|M3W087_FELCA	39 kDa	3	20	0	0
Phospholipid scramblase OS=Felis catus GN=PLSCR4 PE=3 SV=1	tr|M3W0S6|M3W0S6_FELCA	37 kDa	3	2	0	0
Charged multivesicular body protein 2A OS=Felis catus GN=CHMP2A PE=3 SV=1	tr|M3W0W8|M3W0W8_FELCA	25 kDa	3	0	0	0
Uncharacterized protein OS=Felis catus GN=LOC105261103 PE=4 SV=1	tr|M3W3D2|M3W3D2_FELCA	172 kDa	3	11	4	19
Uncharacterized protein OS=Felis catus GN=FOLR2 PE=4 SV=1	tr|M3W3V7|M3W3V7_FELCA	29 kDa	3	0	0	0
Uncharacterized protein OS=Felis catus PE=3 SV=1	tr|M3W4T8|M3W4T8_FELCA (+1)	34 kDa	3	0	0	0
Eukaryotic translation initiation factor 6 OS=Felis catus GN=EIF6 PE=3 SV=1	tr|M3W5W5|M3W5W5_FELCA	27 kDa	3	0	0	0
NADH-cytochrome b5 reductase OS=Felis catus GN=CYB5R2 PE=3 SV=1	tr|M3W5X3|M3W5X3_FELCA	35 kDa	3	0	0	0
5'-nucleotidase ecto OS=Felis catus GN=NT5E PE=3 SV=1	tr|M3W6Q5|M3W6Q5_FELCA	53 kDa	3	6	20	4
Tetraspanin OS=Felis catus GN=CD81 PE=3 SV=1	tr|M3W6S9|M3W6S9_FELCA	24 kDa	3	0	0	4
Hydroxysteroid 17-beta dehydrogenase 14 OS=Felis catus GN=HSD17B14 PE=4 SV=1	tr|M3W7L9|M3W7L9_FELCA	28 kDa	3	0	0	0
Adaptor related protein complex 2 mu 1 subunit OS=Felis catus GN=AP2M1 PE=3 SV=1	tr|M3W8D5|M3W8D5_FELCA	49 kDa	3	5	12	0
Secretory carrier-associated membrane protein OS=Felis catus GN=SCAMP1 PE=3 SV=1	tr|M3W8E9|M3W8E9_FELCA	38 kDa	3	0	0	0
Ribose 5-phosphate isomerase A OS=Felis catus GN=RPIA PE=3 SV=1	tr|M3W8G6|M3W8G6_FELCA	33 kDa	3	0	0	0
Protein disulfide isomerase family A member 6 OS=Felis catus GN=PDIA6 PE=3 SV=1	tr|M3WB33|M3WB33_FELCA	49 kDa	3	34	24	9
NADH:ubiquinone oxidoreductase core subunit S3 OS=Felis catus GN=NDUFS3 PE=3 SV=1	tr|M3WBK3|M3WBK3_FELCA	30 kDa	3	0	0	0
Perilipin OS=Felis catus GN=PLIN3 PE=3 SV=1	tr|M3WCR9|M3WCR9_FELCA	47 kDa	3	0	0	0
Transformer 2 beta homolog OS=Felis catus GN=TRA2B PE=4 SV=1	tr|M3WDF5|M3WDF5_FELCA	34 kDa	3	0	0	0
Phospholipid scramblase OS=Felis catus GN=PLSCR3 PE=3 SV=1	tr|M3WE53|M3WE53_FELCA	32 kDa	3	0	0	0
Serine and arginine rich splicing factor 9 OS=Felis catus GN=SRSF9 PE=4 SV=1	tr|M3WEB9|M3WEB9_FELCA	26 kDa	3	0	0	0
GNAS complex locus OS=Felis catus GN=GNAS PE=4 SV=1	tr|M3WFF6|M3WFF6_FELCA	124 kDa	3	15	2	0
Hydroxyacylglutathione hydrolase OS=Felis catus GN=HAGH PE=3 SV=1	tr|M3WFN3|M3WFN3_FELCA	34 kDa	3	0	0	0
Chromosome 1 open reading frame 50 OS=Felis catus GN=C1orf50 PE=4 SV=1	tr|M3WGI0|M3WGI0_FELCA	22 kDa	3	0	0	0
Ribosomal protein L9 OS=Felis catus GN=RPL9 PE=4 SV=1	tr|M3WGN1|M3WGN1_FELCA	22 kDa	3	0	0	0
Latexin OS=Felis catus GN=LXN PE=4 SV=1	tr|M3WIL4|M3WIL4_FELCA	26 kDa	3	0	0	0
Hydroxysteroid 17-beta dehydrogenase 10 OS=Felis catus GN=HSD17B10 PE=3 SV=1	tr|M3WJP6|M3WJP6_FELCA	27 kDa	3	0	0	0
40S ribosomal protein S26 OS=Felis catus GN=RPS26 PE=3 SV=1	tr|M3WJU8|M3WJU8_FELCA	13 kDa	3	2	2	0
Vesicle transport through interaction with t-SNAREs 1B OS=Felis catus GN=VTI1B PE=4 SV=1	tr|M3WK20|M3WK20_FELCA	27 kDa	3	0	0	0
Small nuclear ribonucleoprotein polypeptides B and B1 OS=Felis catus GN=SNRPB PE=4 SV=1	tr|M3WKQ8|M3WKQ8_FELCA (+1)	33 kDa	3	0	0	0
Uncharacterized protein OS=Felis catus GN=HNRNPC PE=4 SV=1	tr|M3WLJ6|M3WLJ6_FELCA	34 kDa	3	0	0	0
Uncharacterized protein OS=Felis catus PE=3 SV=1	tr|M3WMI6|M3WMI6_FELCA (+1)	14 kDa	3	0	2	2
Vinculin OS=Felis catus GN=VCL PE=4 SV=1	tr|M3WMV2|M3WMV2_FELCA (+1)	124 kDa	3	13	0	51
Chaperonin containing TCP1 subunit 8 OS=Felis catus GN=CCT8 PE=3 SV=1	tr|M3WNF9|M3WNF9_FELCA	60 kDa	3	21	47	16
Tumor protein D52 OS=Felis catus GN=TPD52 PE=4 SV=1	tr|M3WNR0|M3WNR0_FELCA	27 kDa	3	0	0	0
Reticulon OS=Felis catus GN=RTN3 PE=4 SV=1	tr|M3WQJ1|M3WQJ1_FELCA	113 kDa	3	0	0	0
Golgi apparatus membrane protein TVP23 homolog OS=Felis catus GN=TVP23B PE=3 SV=1	tr|M3WRF4|M3WRF4_FELCA	23 kDa	3	0	0	0
Leucine aminopeptidase 3 OS=Felis catus GN=LAP3 PE=3 SV=1	tr|M3WRM3|M3WRM3_FELCA	56 kDa	3	17	54	0
Phospholipid scramblase OS=Felis catus PE=3 SV=1	tr|M3WUX1|M3WUX1_FELCA	35 kDa	3	0	0	0
Uncharacterized protein OS=Felis catus PE=4 SV=1	tr|M3WV47|M3WV47_FELCA	14 kDa	3	0	0	0
Uncharacterized protein OS=Felis catus PE=4 SV=1	tr|M3WVJ0|M3WVJ0_FELCA (+1)	11 kDa	3	0	0	0
Proline rich coiled-coil 1 OS=Felis catus GN=PRRC1 PE=4 SV=1	tr|M3WXU0|M3WXU0_FELCA	46 kDa	3	0	0	0
Thy-1 cell surface antigen OS=Felis catus GN=THY1 PE=4 SV=1	tr|M3WYY4|M3WYY4_FELCA	18 kDa	3	8	5	0
Uncharacterized protein OS=Felis catus PE=4 SV=1	tr|M3WZU6|M3WZU6_FELCA	13 kDa	3	3	9	5
Magnesium transporter 1 OS=Felis catus GN=MAGT1 PE=4 SV=1	tr|M3X2H9|M3X2H9_FELCA	38 kDa	3	0	0	0
ADP ribosylation factor interacting protein 1 OS=Felis catus GN=ARFIP1 PE=4 SV=1	tr|M3X3Q7|M3X3Q7_FELCA	42 kDa	3	0	0	0
ETHE1, persulfide dioxygenase OS=Felis catus GN=ETHE1 PE=4 SV=1	tr|M3X7V2|M3X7V2_FELCA	25 kDa	3	0	0	0
Phospholipid phosphatase 1 OS=Felis catus GN=PLPP1 PE=4 SV=1	tr|M3X9V6|M3X9V6_FELCA	32 kDa	3	0	0	0
KRAS proto-oncogene, GTPase OS=Felis catus GN=KRAS PE=4 SV=1	tr|M3XAU6|M3XAU6_FELCA	21 kDa	3	0	0	0
Adenylate kinase 2, mitochondrial OS=Felis catus GN=AK2 PE=3 SV=1	tr|M3XCM4|M3XCM4_FELCA	26 kDa	3	0	0	0
Ubiquitin carboxyl-terminal hydrolase OS=Felis catus GN=UCHL1 PE=3 SV=1	tr|M3XDW2|M3XDW2_FELCA	25 kDa	3	0	0	0
RAB27B, member RAS oncogene family OS=Felis catus GN=RAB27B PE=4 SV=1	tr|M3XES1|M3XES1_FELCA	25 kDa	3	0	0	0
Galectin 3 binding protein OS=Felis catus GN=LGALS3BP PE=4 SV=1	tr|M3XG56|M3XG56_FELCA	63 kDa	3	10	10	14
F-box protein 6 OS=Felis catus GN=FBXO6 PE=4 SV=1	tr|M3VU09|M3VU09_FELCA	31 kDa	2	0	0	0
Uncharacterized protein OS=Felis catus PE=4 SV=1	tr|M3VU54|M3VU54_FELCA (+1)	21 kDa	2	0	0	0
Uncharacterized protein OS=Felis catus GN=KRT18 PE=3 SV=1	tr|M3VUH3|M3VUH3_FELCA	50 kDa	2	33	3	0
ER membrane protein complex subunit 10 OS=Felis catus GN=EMC10 PE=4 SV=1	tr|M3VUJ9|M3VUJ9_FELCA	27 kDa	2	0	0	0
Secretion associated Ras related GTPase 1B OS=Felis catus GN=SAR1B PE=3 SV=1	tr|M3VUK3|M3VUK3_FELCA (+1)	22 kDa	2	0	0	0
BCL2 interacting protein 1 OS=Felis catus GN=BNIP1 PE=4 SV=1	tr|M3VUY5|M3VUY5_FELCA	26 kDa	2	0	0	0
Phosphoribosyl transferase domain containing 1 OS=Felis catus GN=PRTFDC1 PE=4 SV=1	tr|M3VV03|M3VV03_FELCA	26 kDa	2	0	0	0
Cysteine rich protein 2 OS=Felis catus GN=CRIP2 PE=4 SV=1	tr|M3VV86|M3VV86_FELCA	21 kDa	2	0	0	0
Eukaryotic translation elongation factor 2 OS=Felis catus GN=EEF2 PE=4 SV=1	tr|M3VVM1|M3VVM1_FELCA	95 kDa	2	0	10	31
Uncharacterized protein OS=Felis catus GN=BST2 PE=4 SV=1	tr|M3VVU4|M3VVU4_FELCA	20 kDa	2	0	5	0
Biliverdin reductase B OS=Felis catus GN=BLVRB PE=4 SV=1	tr|M3VVW0|M3VVW0_FELCA	22 kDa	2	0	0	0
Trafficking protein particle complex 4 OS=Felis catus GN=TRAPPC4 PE=4 SV=1	tr|M3VW28|M3VW28_FELCA	24 kDa	2	0	0	0
Tumor protein D52 like 2 OS=Felis catus GN=TPD52L2 PE=4 SV=1	tr|M3VW51|M3VW51_FELCA	25 kDa	2	2	0	0
DnaJ heat shock protein family (Hsp40) member C5 OS=Felis catus GN=DNAJC5 PE=4 SV=1	tr|M3VW52|M3VW52_FELCA	22 kDa	2	0	0	0
Nucleolar and coiled-body phosphoprotein 1 OS=Felis catus GN=NOLC1 PE=4 SV=1	tr|M3VWA0|M3VWA0_FELCA	74 kDa	2	0	0	0
Uveal autoantigen with coiled-coil domains and ankyrin repeats OS=Felis catus GN=UACA PE=4 SV=1	tr|M3VWI2|M3VWI2_FELCA	161 kDa	2	0	0	0
Vanin 1 OS=Felis catus GN=VNN1 PE=4 SV=1	tr|M3VWI5|M3VWI5_FELCA	57 kDa	2	5	20	2
Transmembrane p24 trafficking protein 10 OS=Felis catus GN=TMED10 PE=3 SV=1	tr|M3VWQ5|M3VWQ5_FELCA	24 kDa	2	0	0	2
Transmembrane protein 43 OS=Felis catus GN=TMEM43 PE=4 SV=1	tr|M3VXF0|M3VXF0_FELCA	45 kDa	2	5	0	0
Malectin OS=Felis catus GN=MLEC PE=4 SV=1	tr|M3VYF8|M3VYF8_FELCA	32 kDa	2	0	0	0
Uncharacterized protein OS=Felis catus PE=4 SV=1	tr|M3VZ04|M3VZ04_FELCA	17 kDa	2	0	0	0
Haloacid dehalogenase like hydrolase domain containing 2 OS=Felis catus GN=HDHD2 PE=4 SV=1	tr|M3VZ53|M3VZ53_FELCA	29 kDa	2	0	0	0
Ceruloplasmin OS=Felis catus GN=CP PE=3 SV=1	tr|M3VZY7|M3VZY7_FELCA	125 kDa	2	0	0	31
Fibrinogen alpha chain OS=Felis catus GN=FGA PE=4 SV=1	tr|M3W022|M3W022_FELCA	94 kDa	2	0	3	5
Ribosomal protein S18 OS=Felis catus GN=RPS18 PE=3 SV=1	tr|M3W1E2|M3W1E2_FELCA	18 kDa	2	0	0	0
Actin-related protein 2/3 complex subunit 3 OS=Felis catus GN=ARPC3 PE=3 SV=1	tr|M3W1M4|M3W1M4_FELCA (+1)	21 kDa	2	0	0	0
Vacuolar protein sorting-associated protein 29 OS=Felis catus GN=VPS29 PE=3 SV=1	tr|M3W1M7|M3W1M7_FELCA	21 kDa	2	0	0	0
Uncharacterized protein OS=Felis catus GN=RANBP1 PE=4 SV=1	tr|M3W1P9|M3W1P9_FELCA	18 kDa	2	0	0	0
Valyl-tRNA synthetase OS=Felis catus GN=VARS PE=3 SV=1	tr|M3W2B4|M3W2B4_FELCA	140 kDa	2	0	0	21
Thioredoxin OS=Felis catus GN=TXN PE=3 SV=1	tr|M3W2V1|M3W2V1_FELCA	12 kDa	2	0	0	0
Uncharacterized protein OS=Felis catus PE=4 SV=1	tr|M3W3Q0|M3W3Q0_FELCA	14 kDa	2	0	0	0
Heat shock protein family B (small) member 6 OS=Felis catus GN=HSPB6 PE=3 SV=1	tr|M3W5U1|M3W5U1_FELCA	19 kDa	2	6	0	0
Glypican 4 OS=Felis catus GN=GPC4 PE=3 SV=1	tr|M3W6M4|M3W6M4_FELCA	62 kDa	2	0	0	0
Glutathione S-transferase kappa OS=Felis catus GN=GSTK1 PE=3 SV=1	tr|M3W7F3|M3W7F3_FELCA	25 kDa	2	0	0	0
Stromal cell derived factor 2 like 1 OS=Felis catus GN=SDF2L1 PE=4 SV=1	tr|M3W8T3|M3W8T3_FELCA	26 kDa	2	0	0	0
Abhydrolase domain containing 14B OS=Felis catus GN=ABHD14B PE=4 SV=1	tr|M3WAW3|M3WAW3_FELCA	23 kDa	2	0	0	0
Lymphocyte cytosolic protein 1 OS=Felis catus GN=LCP1 PE=4 SV=1	tr|M3WAY2|M3WAY2_FELCA	71 kDa	2	12	38	7
Erythrocyte membrane protein band 4.1 like 2 OS=Felis catus GN=EPB41L2 PE=4 SV=1	tr|M3WB54|M3WB54_FELCA	109 kDa	2	17	9	20
Transferrin OS=Felis catus GN=TF PE=3 SV=1	tr|M3WBQ5|M3WBQ5_FELCA	79 kDa	2	14	71	23
CD59 molecule (CD59 blood group) OS=Felis catus GN=CD59 PE=4 SV=1	tr|M3WCR6|M3WCR6_FELCA	14 kDa	2	0	0	0
Histone H2B OS=Felis catus GN=HIST2H2BE PE=3 SV=1	tr|M3WCZ9|M3WCZ9_FELCA (+10)	14 kDa	2	0	0	0
Coactosin like F-actin binding protein 1 OS=Felis catus GN=COTL1 PE=4 SV=1	tr|M3WE05|M3WE05_FELCA	16 kDa	2	0	0	0
ATPase H+ transporting V1 subunit D OS=Felis catus GN=ATP6V1D PE=4 SV=1	tr|M3WEF5|M3WEF5_FELCA	28 kDa	2	0	0	0
Bone marrow stromal cell antigen 1 OS=Felis catus GN=BST1 PE=4 SV=1	tr|M3WEJ1|M3WEJ1_FELCA	30 kDa	2	33	14	0
D-3-phosphoglycerate dehydrogenase OS=Felis catus GN=PHGDH PE=3 SV=1	tr|M3WF60|M3WF60_FELCA	57 kDa	2	6	10	8
Serpin family H member 1 OS=Felis catus GN=SERPINH1 PE=3 SV=1	tr|M3WG24|M3WG24_FELCA	46 kDa	2	43	6	0
ATP synthase subunit beta OS=Felis catus GN=ATP5B PE=3 SV=1	tr|M3WG78|M3WG78_FELCA	56 kDa	2	18	7	0
Cathepsin H OS=Felis catus GN=CTSH PE=3 SV=1	tr|M3WGI2|M3WGI2_FELCA	37 kDa	2	0	0	0
Clathrin light chain OS=Felis catus GN=CLTA PE=3 SV=1	tr|M3WHJ6|M3WHJ6_FELCA	24 kDa	2	5	0	0
NSFL1 cofactor OS=Felis catus GN=NSFL1C PE=4 SV=1	tr|M3WHQ6|M3WHQ6_FELCA	37 kDa	2	4	0	0
Glutathione peroxidase OS=Felis catus GN=GPX3 PE=3 SV=1	tr|M3WHS6|M3WHS6_FELCA	25 kDa	2	0	0	0
Adaptor related protein complex 2 alpha 2 subunit OS=Felis catus GN=AP2A2 PE=4 SV=1	tr|M3WI80|M3WI80_FELCA	104 kDa	2	0	0	33
Thioredoxin domain containing 9 OS=Felis catus GN=TXNDC9 PE=4 SV=1	tr|M3WID0|M3WID0_FELCA	27 kDa	2	0	0	0
Phosphoglycerate kinase OS=Felis catus GN=PGK1 PE=3 SV=1	tr|M3WIF4|M3WIF4_FELCA	45 kDa	2	49	0	0
Uncharacterized protein OS=Felis catus GN=CFL1 PE=3 SV=1	tr|M3WIJ6|M3WIJ6_FELCA	19 kDa	2	2	2	5
Inosine triphosphate pyrophosphatase OS=Felis catus GN=ITPA PE=3 SV=1	tr|M3WIT7|M3WIT7_FELCA	23 kDa	2	0	0	0
Lipocalin 9 OS=Felis catus GN=LCN9 PE=4 SV=1	tr|M3WIX8|M3WIX8_FELCA (+1)	17 kDa	2	0	0	0
Ring finger protein 103 OS=Felis catus GN=RNF103 PE=3 SV=1	tr|M3WJ63|M3WJ63_FELCA	28 kDa	2	0	0	0
Transmembrane protein 19 OS=Felis catus GN=TMEM19 PE=4 SV=1	tr|M3WJC1|M3WJC1_FELCA	36 kDa	2	0	0	0
Uncharacterized protein OS=Felis catus GN=METTL7A PE=4 SV=1	tr|M3WJP2|M3WJP2_FELCA	28 kDa	2	0	0	0
Phospholipid phosphatase 3 OS=Felis catus GN=PLPP3 PE=4 SV=1	tr|M3WKE1|M3WKE1_FELCA	30 kDa	2	0	0	0
Biphenyl hydrolase like OS=Felis catus GN=BPHL PE=4 SV=1	tr|M3WL14|M3WL14_FELCA	34 kDa	2	0	0	0
Ribosomal protein L34 OS=Felis catus GN=RPL34 PE=4 SV=1	tr|M3WMR1|M3WMR1_FELCA	13 kDa	2	3	3	4
Uncharacterized protein OS=Felis catus PE=4 SV=1	tr|M3WN91|M3WN91_FELCA	15 kDa	2	0	0	0
Proteasome 26S subunit, ATPase 6 OS=Felis catus GN=PSMC6 PE=3 SV=1	tr|M3WNQ7|M3WNQ7_FELCA	46 kDa	2	10	0	8
Y-box binding protein 2 OS=Felis catus GN=YBX2 PE=4 SV=1	tr|M3WNQ9|M3WNQ9_FELCA	33 kDa	2	0	0	0
Uncharacterized protein OS=Felis catus PE=4 SV=1	tr|M3WQW2|M3WQW2_FELCA	28 kDa	2	0	0	0
Myeloid leukemia factor 1 OS=Felis catus GN=MLF1 PE=4 SV=1	tr|M3WR71|M3WR71_FELCA	31 kDa	2	0	0	0
Uncharacterized protein OS=Felis catus PE=4 SV=1	tr|M3WS12|M3WS12_FELCA	24 kDa	2	0	0	0
ATP synthase, H+ transporting, mitochondrial Fo complex subunit B1 OS=Felis catus GN=ATP5F1 PE=4 SV=1	tr|M3WS49|M3WS49_FELCA (+1)	29 kDa	2	0	0	0
Actin-related protein 2/3 complex subunit 4 OS=Felis catus GN=ARPC4 PE=3 SV=1	tr|M3WSL5|M3WSL5_FELCA	22 kDa	2	0	0	0
Prenylcysteine oxidase 1 OS=Felis catus GN=PCYOX1 PE=3 SV=1	tr|M3WSQ5|M3WSQ5_FELCA	57 kDa	2	0	14	0
Stromal cell derived factor 2 OS=Felis catus GN=SDF2 PE=4 SV=1	tr|M3WTF2|M3WTF2_FELCA	23 kDa	2	0	0	0
ER membrane protein complex subunit 3 OS=Felis catus GN=EMC3 PE=3 SV=1	tr|M3WUY6|M3WUY6_FELCA	30 kDa	2	0	0	0
RAB2A, member RAS oncogene family OS=Felis catus GN=RAB2A PE=4 SV=1	tr|M3WVD4|M3WVD4_FELCA (+1)	24 kDa	2	0	0	0
Glutathione peroxidase OS=Felis catus GN=GPX1 PE=3 SV=1	tr|M3WVG5|M3WVG5_FELCA	16 kDa	2	0	0	0
Uncharacterized protein OS=Felis catus GN=RPL32 PE=4 SV=1	tr|M3WW95|M3WW95_FELCA	16 kDa	2	2	0	0
2',3'-cyclic-nucleotide 3'-phosphodiesterase OS=Felis catus GN=CNP PE=3 SV=1	tr|M3WWG3|M3WWG3_FELCA	47 kDa	2	23	0	3
Sigma non-opioid intracellular receptor 1 OS=Felis catus GN=SIGMAR1 PE=4 SV=1	tr|M3WWZ5|M3WWZ5_FELCA	25 kDa	2	0	0	0
Uncharacterized protein OS=Felis catus GN=CCT6A PE=3 SV=1	tr|M3WY56|M3WY56_FELCA	58 kDa	2	24	43	10
Protein-L-isoaspartate O-methyltransferase OS=Felis catus GN=PCMT1 PE=3 SV=1	tr|M3WYS3|M3WYS3_FELCA	25 kDa	2	0	0	0
Charged multivesicular body protein 2B OS=Felis catus GN=CHMP2B PE=3 SV=1	tr|M3WYZ6|M3WYZ6_FELCA	24 kDa	2	0	0	0
Tumor susceptibility 101 OS=Felis catus GN=TSG101 PE=4 SV=1	tr|M3WZG1|M3WZG1_FELCA	44 kDa	2	0	0	0
40S ribosomal protein S12 OS=Felis catus PE=3 SV=1	tr|M3WZH1|M3WZH1_FELCA	13 kDa	2	0	0	0
HAUS augmin like complex subunit 5 OS=Felis catus GN=HAUS5 PE=4 SV=1	tr|M3X197|M3X197_FELCA	71 kDa	2	0	0	0
Uncharacterized protein OS=Felis catus PE=4 SV=1	tr|M3X1Q2|M3X1Q2_FELCA	10 kDa	2	0	0	0
Protein disulfide-isomerase OS=Felis catus GN=P4HB PE=3 SV=1	tr|M3X1Y4|M3X1Y4_FELCA (+1)	57 kDa	2	32	82	18
Aspartate beta-hydroxylase OS=Felis catus GN=ASPH PE=4 SV=1	tr|M3X3R5|M3X3R5_FELCA	83 kDa	2	0	0	9
Uncharacterized protein OS=Felis catus PE=4 SV=1	tr|M3X5C8|M3X5C8_FELCA	21 kDa	2	13	0	0
Uncharacterized protein OS=Felis catus GN=TSNAX PE=4 SV=1	tr|M3X5Z0|M3X5Z0_FELCA	33 kDa	2	0	0	0
Actinin alpha 4 OS=Felis catus GN=ACTN4 PE=4 SV=1	tr|M3X6F7|M3X6F7_FELCA	96 kDa	2	0	0	63
Synaptogyrin OS=Felis catus GN=SYNGR2 PE=3 SV=1	tr|M3X775|M3X775_FELCA	24 kDa	2	0	0	0
Uncharacterized protein OS=Felis catus PE=4 SV=1	tr|M3X833|M3X833_FELCA	37 kDa	2	0	11	14
SPRY domain containing 7 OS=Felis catus GN=SPRYD7 PE=4 SV=1	tr|M3X973|M3X973_FELCA	22 kDa	2	0	0	0
Uncharacterized protein OS=Felis catus GN=ARPIN PE=4 SV=1	tr|M3XAT9|M3XAT9_FELCA	22 kDa	2	0	0	0
Joining chain of multimeric IgA and IgM OS=Felis catus GN=JCHAIN PE=4 SV=1	tr|M3XBL5|M3XBL5_FELCA	18 kDa	2	0	0	2
COP9 signalosome subunit 4 OS=Felis catus GN=COPS4 PE=4 SV=1	tr|M3XBM5|M3XBM5_FELCA	46 kDa	2	10	0	0
Vacuolar protein sorting 13 homolog C OS=Felis catus GN=VPS13C PE=4 SV=1	tr|M3XCG9|M3XCG9_FELCA	344 kDa	2	0	0	0
Integral membrane protein 2B OS=Felis catus GN=ITM2B PE=4 SV=1	tr|M3XCZ5|M3XCZ5_FELCA	26 kDa	2	7	2	4
Adducin 1 OS=Felis catus GN=ADD1 PE=4 SV=1	tr|M3XD22|M3XD22_FELCA	87 kDa	2	3	0	0
Uncharacterized protein OS=Felis catus PE=4 SV=1	tr|M3XDV4|M3XDV4_FELCA	13 kDa	2	0	0	0
Tetraspanin OS=Felis catus GN=TSPAN9 PE=3 SV=1	tr|M3XE22|M3XE22_FELCA	27 kDa	2	0	0	0
Protein YIPF OS=Felis catus GN=YIPF4 PE=3 SV=1	tr|M3XEX6|M3XEX6_FELCA	27 kDa	2	0	0	0
Nitrilase family member 2 OS=Felis catus GN=NIT2 PE=4 SV=1	tr|M3XFS6|M3XFS6_FELCA	31 kDa	2	0	0	0
Charged multivesicular body protein 1A OS=Felis catus GN=CHMP1A PE=4 SV=1	tr|M3XFV1|M3XFV1_FELCA	22 kDa	2	0	0	0
Uncharacterized protein OS=Felis catus PE=4 SV=1	tr|M3XG22|M3XG22_FELCA	13 kDa	2	0	0	0
Apolipoprotein A-IV OS=Felis catus GN=APOA4 PE=3 SV=2	sp|M3W955|APOA4_FELCA	44 kDa	0	19	0	0
Beta-hexosaminidase subunit beta OS=Felis catus GN=HEXB PE=2 SV=2	sp|P49614|HEXB_FELCA	60 kDa	0	3	24	0
Integrin beta-1 OS=Felis catus GN=ITGB1 PE=2 SV=1	sp|P53713|ITB1_FELCA	88 kDa	0	0	0	32
Aminopeptidase N OS=Felis catus GN=ANPEP PE=1 SV=3	sp|P79171|AMPN_FELCA	109 kDa	0	0	0	41
Steroid 21-hydroxylase OS=Felis catus GN=CYP21 PE=3 SV=1	sp|Q2LA60|CP21A_FELCA (+1)	55 kDa	0	0	0	2
CD63 antigen OS=Felis catus GN=CD63 PE=2 SV=3	sp|Q76B49|CD63_FELCA (+1)	26 kDa	0	14	9	0
Dipeptidyl peptidase 4 OS=Felis catus GN=DPP4 PE=2 SV=1	sp|Q9N2I7|DPP4_FELCA (+1)	88 kDa	0	0	0	27
Dystroglycan 1 OS=Felis catus GN=DAG1 PE=2 SV=1	tr|B4XEM8|B4XEM8_FELCA	97 kDa	0	0	0	3
Cyclophilin D OS=Felis catus GN=PPID PE=2 SV=1	tr|G3XEW7|G3XEW7_FELCA	41 kDa	0	15	0	0
Beta-hexosaminidase OS=Felis catus GN=HEXA PE=2 SV=1	tr|G4XSV9|G4XSV9_FELCA	61 kDa	0	0	5	0
Family with sequence similarity 98 member B OS=Felis catus GN=FAM98B PE=4 SV=1	tr|M3VTY4|M3VTY4_FELCA	45 kDa	0	5	0	0
Uncharacterized protein OS=Felis catus PE=4 SV=1	tr|M3VTY8|M3VTY8_FELCA	14 kDa	0	3	0	0
Complement factor I OS=Felis catus GN=CFI PE=3 SV=1	tr|M3VU42|M3VU42_FELCA	66 kDa	0	3	2	0
Peptidylprolyl isomerase OS=Felis catus GN=FKBP4 PE=4 SV=1	tr|M3VU61|M3VU61_FELCA	51 kDa	0	5	6	0
Alpha-1-acid glycoprotein OS=Felis catus GN=AGP PE=3 SV=1	tr|M3VU75|M3VU75_FELCA	23 kDa	0	0	2	0
LDL receptor related protein 1 OS=Felis catus GN=LRP1 PE=4 SV=1	tr|M3VU91|M3VU91_FELCA (+1)	505 kDa	0	0	0	5
Inter-alpha-trypsin inhibitor heavy chain 2 OS=Felis catus GN=ITIH2 PE=4 SV=1	tr|M3VU96|M3VU96_FELCA	107 kDa	0	0	0	8
Nucleosome assembly protein 1 like 1 OS=Felis catus GN=NAP1L1 PE=3 SV=1	tr|M3VUF4|M3VUF4_FELCA	45 kDa	0	0	8	0
Eukaryotic translation initiation factor 3 subunit M OS=Felis catus GN=EIF3M PE=3 SV=1	tr|M3VUI2|M3VUI2_FELCA	42 kDa	0	10	0	0
Ectonucleoside triphosphate diphosphohydrolase 2 OS=Felis catus GN=ENTPD2 PE=3 SV=1	tr|M3VUP3|M3VUP3_FELCA	46 kDa	0	0	3	2
CTR9 homolog, Paf1/RNA polymerase II complex component OS=Felis catus GN=CTR9 PE=4 SV=1	tr|M3VUP9|M3VUP9_FELCA	133 kDa	0	0	0	3
Integrin subunit alpha 6 OS=Felis catus GN=ITGA6 PE=3 SV=1	tr|M3VUR4|M3VUR4_FELCA	115 kDa	0	0	0	2
Protein O-linked mannose N-acetylglucosaminyltransferase 2 (beta 1,4-) OS=Felis catus GN=POMGNT2 PE=4 SV=1	tr|M3VUY7|M3VUY7_FELCA	66 kDa	0	0	2	0
Proteasome 26S subunit, non-ATPase 6 OS=Felis catus GN=PSMD6 PE=4 SV=1	tr|M3VV10|M3VV10_FELCA	46 kDa	0	36	2	0
Proteasome 26S subunit, ATPase 2 OS=Felis catus GN=PSMC2 PE=3 SV=1	tr|M3VV51|M3VV51_FELCA	49 kDa	0	8	0	14
Tyrosine--tRNA ligase OS=Felis catus GN=YARS PE=3 SV=1	tr|M3VV93|M3VV93_FELCA (+1)	59 kDa	0	0	2	0
Adaptor related protein complex 3 mu 1 subunit OS=Felis catus GN=AP3M1 PE=3 SV=1	tr|M3VVD7|M3VVD7_FELCA	47 kDa	0	10	0	0
Serpin family B member 9 OS=Felis catus GN=SERPINB9 PE=3 SV=1	tr|M3VVF8|M3VVF8_FELCA	43 kDa	0	5	0	0
Heat shock protein 90 alpha family class A member 1 OS=Felis catus GN=HSP90AA1 PE=3 SV=1	tr|M3VVG3|M3VVG3_FELCA	86 kDa	0	9	8	43
Isoleucyl-tRNA synthetase OS=Felis catus GN=IARS PE=3 SV=1	tr|M3VVG6|M3VVG6_FELCA	144 kDa	0	0	0	3
Osteoglycin OS=Felis catus GN=OGN PE=4 SV=1	tr|M3VVG9|M3VVG9_FELCA	35 kDa	0	6	0	0
Actinin alpha 1 OS=Felis catus GN=ACTN1 PE=4 SV=1	tr|M3VVH8|M3VVH8_FELCA	100 kDa	0	0	0	60
Calcium-transporting ATPase OS=Felis catus GN=ATP2B4 PE=3 SV=1	tr|M3VVK0|M3VVK0_FELCA (+2)	134 kDa	0	0	0	3
Glucosylceramidase OS=Felis catus GN=GBA PE=3 SV=1	tr|M3VVL7|M3VVL7_FELCA (+1)	60 kDa	0	0	2	0
Protein disulfide isomerase family A member 5 OS=Felis catus GN=PDIA5 PE=4 SV=1	tr|M3VVP1|M3VVP1_FELCA	60 kDa	0	0	12	0
Melanoma cell adhesion molecule OS=Felis catus GN=MCAM PE=4 SV=1	tr|M3VVS0|M3VVS0_FELCA	71 kDa	0	0	0	2
Tissue specific transplantation antigen P35B OS=Felis catus GN=TSTA3 PE=3 SV=1	tr|M3VVW7|M3VVW7_FELCA	36 kDa	0	2	0	0
Scavenger receptor class B member 2 OS=Felis catus GN=SCARB2 PE=3 SV=1	tr|M3VW08|M3VW08_FELCA	54 kDa	0	0	0	2
Stomatin like 2 OS=Felis catus GN=STOML2 PE=4 SV=1	tr|M3VW09|M3VW09_FELCA	39 kDa	0	2	0	0
Myosin heavy chain 9 OS=Felis catus GN=MYH9 PE=3 SV=1	tr|M3VW11|M3VW11_FELCA	226 kDa	0	0	0	16
Eukaryotic translation initiation factor 3 subunit D OS=Felis catus GN=EIF3D PE=3 SV=1	tr|M3VW18|M3VW18_FELCA	64 kDa	0	2	14	0
Hypoxia up-regulated 1 OS=Felis catus GN=HYOU1 PE=3 SV=1	tr|M3VW30|M3VW30_FELCA	112 kDa	0	0	0	20
Tropomodulin 1 OS=Felis catus GN=TMOD1 PE=4 SV=1	tr|M3VW72|M3VW72_FELCA	41 kDa	0	4	0	0
N-acetylneuraminate synthase OS=Felis catus GN=NANS PE=4 SV=1	tr|M3VW76|M3VW76_FELCA (+1)	40 kDa	0	6	0	0
ARP1 actin-related protein 1 homolog A, centractin alpha OS=Felis catus GN=ACTR1A PE=3 SV=1	tr|M3VWA6|M3VWA6_FELCA	43 kDa	0	43	5	0
UDP-glucose glycoprotein glucosyltransferase 1 OS=Felis catus GN=UGGT1 PE=4 SV=1	tr|M3VWB5|M3VWB5_FELCA	178 kDa	0	0	0	9
Purine rich element binding protein A OS=Felis catus GN=PURA PE=4 SV=1	tr|M3VWB8|M3VWB8_FELCA	34 kDa	0	22	5	6
Histidyl-tRNA synthetase OS=Felis catus GN=HARS PE=3 SV=1	tr|M3VWD2|M3VWD2_FELCA	57 kDa	0	0	0	14
Aconitate hydratase OS=Felis catus GN=ACO1 PE=3 SV=1	tr|M3VWD8|M3VWD8_FELCA	98 kDa	0	0	0	28
Coronin OS=Felis catus GN=CORO1A PE=3 SV=1	tr|M3VWE3|M3VWE3_FELCA	51 kDa	0	3	2	0
Proteasome 26S subunit, non-ATPase 5 OS=Felis catus GN=PSMD5 PE=4 SV=1	tr|M3VWE7|M3VWE7_FELCA	56 kDa	0	9	9	0
Vacuolar protein sorting-associated protein 35 OS=Felis catus GN=VPS35 PE=3 SV=1	tr|M3VWJ8|M3VWJ8_FELCA	92 kDa	0	3	0	5
Ubiquitin like modifier activating enzyme 1 OS=Felis catus GN=UBA1 PE=3 SV=1	tr|M3VWK3|M3VWK3_FELCA	118 kDa	0	0	6	78
Fructose-bisphosphate aldolase OS=Felis catus GN=ALDOB PE=3 SV=1	tr|M3VWL2|M3VWL2_FELCA	40 kDa	0	5	0	0
Uncharacterized protein OS=Felis catus PE=4 SV=1	tr|M3VWN2|M3VWN2_FELCA	68 kDa	0	0	0	2
Alpha-N-acetylgalactosaminidase OS=Felis catus GN=NAGA PE=3 SV=1	tr|M3VWN7|M3VWN7_FELCA	47 kDa	0	7	0	0
WASH complex subunit 4 OS=Felis catus GN=WASHC4 PE=4 SV=1	tr|M3VWP4|M3VWP4_FELCA	134 kDa	0	0	0	2
Collagen type XIV alpha 1 chain OS=Felis catus GN=COL14A1 PE=4 SV=1	tr|M3VWP6|M3VWP6_FELCA	193 kDa	0	0	4	38
Coatomer subunit beta' OS=Felis catus GN=COPB2 PE=3 SV=1	tr|M3VWP9|M3VWP9_FELCA	102 kDa	0	0	0	10
Family with sequence similarity 129 member B OS=Felis catus GN=FAM129B PE=4 SV=1	tr|M3VWQ9|M3VWQ9_FELCA	84 kDa	0	0	5	3
Syntaxin binding protein 1 OS=Felis catus GN=STXBP1 PE=3 SV=1	tr|M3VWR0|M3VWR0_FELCA	68 kDa	0	0	5	0
Uncharacterized protein OS=Felis catus GN=GGT1 PE=4 SV=1	tr|M3VWS9|M3VWS9_FELCA	61 kDa	0	6	17	0
SEC31 homolog A, COPII coat complex component OS=Felis catus GN=SEC31A PE=4 SV=1	tr|M3VWV4|M3VWV4_FELCA	133 kDa	0	0	0	8
Ectonucleotide pyrophosphatase/phosphodiesterase 6 OS=Felis catus GN=ENPP6 PE=4 SV=1	tr|M3VWW1|M3VWW1_FELCA	50 kDa	0	0	11	25
Syntaxin binding protein 2 OS=Felis catus GN=STXBP2 PE=3 SV=1	tr|M3VWX8|M3VWX8_FELCA	66 kDa	0	0	4	0
Catenin alpha 1 OS=Felis catus GN=CTNNA1 PE=4 SV=1	tr|M3VX56|M3VX56_FELCA	100 kDa	0	0	0	10
SIL1 nucleotide exchange factor OS=Felis catus GN=SIL1 PE=4 SV=1	tr|M3VX58|M3VX58_FELCA	52 kDa	0	0	10	0
Enolase 3 OS=Felis catus GN=ENO3 PE=3 SV=1	tr|M3VX63|M3VX63_FELCA	47 kDa	0	22	0	0
10-formyltetrahydrofolate dehydrogenase OS=Felis catus GN=ALDH1L1 PE=3 SV=1	tr|M3VX94|M3VX94_FELCA	99 kDa	0	0	0	6
NCK adaptor protein 1 OS=Felis catus GN=NCK1 PE=4 SV=1	tr|M3VXA9|M3VXA9_FELCA	43 kDa	0	2	0	0
Aldehyde dehydrogenase 8 family member A1 OS=Felis catus GN=ALDH8A1 PE=3 SV=1	tr|M3VXB6|M3VXB6_FELCA	53 kDa	0	0	3	0
Selenium binding protein 1 OS=Felis catus GN=SELENBP1 PE=4 SV=1	tr|M3VXE7|M3VXE7_FELCA	53 kDa	0	6	26	0
Polyadenylate-binding protein OS=Felis catus GN=PABPC1 PE=3 SV=1	tr|M3VXF8|M3VXF8_FELCA	63 kDa	0	20	4	0
Keratin 19 OS=Felis catus GN=KRT19 PE=3 SV=1	tr|M3VXK3|M3VXK3_FELCA	44 kDa	0	18	0	0
Lipase OS=Felis catus GN=LIPA PE=3 SV=1	tr|M3VXL3|M3VXL3_FELCA	46 kDa	0	6	0	0
Armadillo repeat containing 8 OS=Felis catus GN=ARMC8 PE=4 SV=1	tr|M3VXL8|M3VXL8_FELCA	76 kDa	0	2	0	0
N-acetylglucosamine-6-phosphate deacetylase OS=Felis catus GN=AMDHD2 PE=3 SV=1	tr|M3VXM4|M3VXM4_FELCA	44 kDa	0	6	0	0
Prostaglandin F2 receptor inhibitor OS=Felis catus GN=PTGFRN PE=4 SV=1	tr|M3VXN4|M3VXN4_FELCA	98 kDa	0	0	0	46
Proteasome 26S subunit, non-ATPase 11 OS=Felis catus GN=PSMD11 PE=4 SV=1	tr|M3VXT7|M3VXT7_FELCA	47 kDa	0	43	5	0
Angiotensin-converting enzyme OS=Felis catus PE=3 SV=1	tr|M3VXV0|M3VXV0_FELCA	142 kDa	0	0	0	34
Coatomer subunit gamma OS=Felis catus GN=COPG1 PE=3 SV=1	tr|M3VXV1|M3VXV1_FELCA	90 kDa	0	0	2	6
Methionyl-tRNA synthetase OS=Felis catus GN=MARS PE=3 SV=1	tr|M3VXV4|M3VXV4_FELCA	101 kDa	0	0	0	15
Dynactin subunit 2 OS=Felis catus GN=DCTN2 PE=4 SV=1	tr|M3VXV6|M3VXV6_FELCA	45 kDa	0	8	6	16
ATP-citrate synthase OS=Felis catus GN=ACLY PE=3 SV=1	tr|M3VXZ1|M3VXZ1_FELCA	122 kDa	0	8	0	56
Heterogeneous nuclear ribonucleoprotein U OS=Felis catus GN=HNRNPU PE=4 SV=1	tr|M3VY03|M3VY03_FELCA	91 kDa	0	0	0	2
Ankyrin repeat and FYVE domain containing 1 OS=Felis catus GN=ANKFY1 PE=4 SV=1	tr|M3VY70|M3VY70_FELCA	130 kDa	0	0	0	5
Integrin beta OS=Felis catus GN=ITGB2 PE=3 SV=1	tr|M3VY84|M3VY84_FELCA	85 kDa	0	0	0	11
Phosphoinositide phospholipase C OS=Felis catus GN=PLCD1 PE=4 SV=1	tr|M3VY86|M3VY86_FELCA	87 kDa	0	0	3	5
Adenosine deaminase OS=Felis catus GN=ADA PE=3 SV=1	tr|M3VYK1|M3VYK1_FELCA	40 kDa	0	2	0	0
EGF like repeats and discoidin domains 3 OS=Felis catus GN=EDIL3 PE=4 SV=1	tr|M3VYL7|M3VYL7_FELCA	54 kDa	0	0	2	0
Uncharacterized protein OS=Felis catus PE=3 SV=1	tr|M3VYP6|M3VYP6_FELCA	40 kDa	0	9	0	2
RAB3 GTPase activating non-catalytic protein subunit 2 OS=Felis catus GN=RAB3GAP2 PE=4 SV=1	tr|M3VYT6|M3VYT6_FELCA	156 kDa	0	0	0	2
Proteasome 26S subunit, non-ATPase 13 OS=Felis catus GN=PSMD13 PE=4 SV=1	tr|M3VYX6|M3VYX6_FELCA	43 kDa	0	7	0	0
Creatine kinase, M-type OS=Felis catus GN=CKM PE=3 SV=1	tr|M3VYX8|M3VYX8_FELCA	43 kDa	0	5	0	0
Exportin 1 OS=Felis catus GN=XPO1 PE=4 SV=1	tr|M3VYZ8|M3VYZ8_FELCA	118 kDa	0	0	0	15
Golgi glycoprotein 1 OS=Felis catus GN=GLG1 PE=4 SV=1	tr|M3VZ10|M3VZ10_FELCA	99 kDa	0	0	0	29
Clathrin heavy chain OS=Felis catus GN=CLTCL1 PE=3 SV=1	tr|M3VZ24|M3VZ24_FELCA	190 kDa	0	0	0	11
Alpha-1,4 glucan phosphorylase OS=Felis catus GN=PYGL PE=3 SV=1	tr|M3VZ45|M3VZ45_FELCA	88 kDa	0	0	0	19
Septin 2 OS=Felis catus GN=SEPT2 PE=3 SV=1	tr|M3VZ57|M3VZ57_FELCA	41 kDa	0	21	0	0
Acetyl-CoA acetyltransferase 2 OS=Felis catus GN=ACAT2 PE=3 SV=1	tr|M3VZ88|M3VZ88_FELCA	41 kDa	0	2	0	0
T-complex 1 OS=Felis catus GN=TCP1 PE=3 SV=1	tr|M3VZ89|M3VZ89_FELCA	61 kDa	0	6	35	12
Aldo-keto reductase family 1 member A1 OS=Felis catus GN=AKR1A1 PE=4 SV=1	tr|M3VZ98|M3VZ98_FELCA	37 kDa	0	7	0	0
Target of myb1 like 1 membrane trafficking protein OS=Felis catus GN=TOM1L1 PE=3 SV=1	tr|M3VZB5|M3VZB5_FELCA (+2)	53 kDa	0	0	2	0
Anion exchange protein OS=Felis catus GN=SLC4A1 PE=3 SV=1	tr|M3VZM4|M3VZM4_FELCA	105 kDa	0	9	0	0
Gelsolin OS=Felis catus GN=GSN PE=4 SV=1	tr|M3VZP6|M3VZP6_FELCA	82 kDa	0	26	4	24
Promyelocytic leukemia OS=Felis catus GN=PML PE=4 SV=1	tr|M3VZQ0|M3VZQ0_FELCA	97 kDa	0	0	0	5
Chaperonin containing TCP1 subunit 5 OS=Felis catus GN=CCT5 PE=3 SV=1	tr|M3VZR8|M3VZR8_FELCA	60 kDa	0	7	47	16
N-myc downstream regulated 1 OS=Felis catus GN=NDRG1 PE=4 SV=1	tr|M3VZX9|M3VZX9_FELCA	42 kDa	0	6	0	0
ERGIC and golgi 3 OS=Felis catus GN=ERGIC3 PE=4 SV=1	tr|M3VZZ0|M3VZZ0_FELCA	45 kDa	0	5	0	0
Uncharacterized protein OS=Felis catus GN=CSNK2A1 PE=3 SV=1	tr|M3W025|M3W025_FELCA	45 kDa	0	21	0	0
Cadherin 11 OS=Felis catus GN=CDH11 PE=4 SV=1	tr|M3W046|M3W046_FELCA	88 kDa	0	0	0	3
IQ motif containing GTPase activating protein 2 OS=Felis catus GN=IQGAP2 PE=4 SV=1	tr|M3W048|M3W048_FELCA (+1)	182 kDa	0	0	0	7
Nucleobindin 1 OS=Felis catus GN=NUCB1 PE=4 SV=1	tr|M3W064|M3W064_FELCA	53 kDa	0	0	6	0
Dihydrodiol dehydrogenase OS=Felis catus GN=DHDH PE=4 SV=1	tr|M3W065|M3W065_FELCA	36 kDa	0	3	0	0
Retinol saturase OS=Felis catus GN=RETSAT PE=4 SV=1	tr|M3W085|M3W085_FELCA	67 kDa	0	0	2	0
Endoplasmic reticulum oxidoreductase 1 beta OS=Felis catus GN=ERO1B PE=4 SV=1	tr|M3W090|M3W090_FELCA	53 kDa	0	0	2	0
Coronin OS=Felis catus GN=CORO1B PE=3 SV=1	tr|M3W0A0|M3W0A0_FELCA	54 kDa	0	0	3	0
V-type proton ATPase subunit OS=Felis catus GN=ATP6V0D1 PE=3 SV=1	tr|M3W0C1|M3W0C1_FELCA	40 kDa	0	3	0	0
Catenin beta 1 OS=Felis catus GN=CTNNB1 PE=4 SV=1	tr|M3W0E4|M3W0E4_FELCA	85 kDa	0	0	5	0
Proteasome 26S subunit, ATPase 5 OS=Felis catus GN=PSMC5 PE=3 SV=1	tr|M3W0G3|M3W0G3_FELCA	47 kDa	0	21	3	12
Platelet and endothelial cell adhesion molecule 1 OS=Felis catus GN=PECAM1 PE=4 SV=1	tr|M3W0H0|M3W0H0_FELCA	78 kDa	0	0	0	16
Prenylcysteine oxidase 1 like OS=Felis catus GN=PCYOX1L PE=3 SV=1	tr|M3W0N9|M3W0N9_FELCA	52 kDa	0	0	2	0
Platelet-derived growth factor receptor beta OS=Felis catus GN=PDGFRB PE=3 SV=1	tr|M3W0P6|M3W0P6_FELCA	122 kDa	0	0	0	7
Thioredoxin reductase 1 OS=Felis catus GN=TXNRD1 PE=3 SV=1	tr|M3W0Q4|M3W0Q4_FELCA	68 kDa	0	0	20	0
Eukaryotic translation initiation factor 3 subunit E OS=Felis catus GN=EIF3E PE=3 SV=1	tr|M3W0R4|M3W0R4_FELCA	52 kDa	0	35	5	0
Alpha-1-B glycoprotein OS=Felis catus GN=A1BG PE=4 SV=1	tr|M3W0W4|M3W0W4_FELCA	54 kDa	0	0	2	4
Tripartite motif containing 28 OS=Felis catus GN=TRIM28 PE=4 SV=1	tr|M3W0W7|M3W0W7_FELCA	76 kDa	0	0	3	4
Lumican OS=Felis catus GN=LUM PE=4 SV=1	tr|M3W0X1|M3W0X1_FELCA	38 kDa	0	0	8	0
Carboxylic ester hydrolase OS=Felis catus GN=CES2 PE=3 SV=1	tr|M3W105|M3W105_FELCA	61 kDa	0	0	8	0
Uncharacterized protein OS=Felis catus PE=3 SV=1	tr|M3W119|M3W119_FELCA	50 kDa	0	0	25	28
Integrin beta OS=Felis catus GN=ITGB3 PE=3 SV=1	tr|M3W149|M3W149_FELCA	86 kDa	0	0	0	4
Complement C8 beta chain OS=Felis catus GN=C8B PE=4 SV=1	tr|M3W159|M3W159_FELCA	67 kDa	0	0	4	0
Protein phosphatase 2 scaffold subunit Aalpha OS=Felis catus GN=PPP2R1A PE=4 SV=1	tr|M3W170|M3W170_FELCA	65 kDa	0	0	42	2
Coatomer subunit alpha OS=Felis catus GN=COPA PE=4 SV=1	tr|M3W182|M3W182_FELCA	139 kDa	0	12	14	14
Nicastrin OS=Felis catus GN=NCSTN PE=4 SV=1	tr|M3W183|M3W183_FELCA	75 kDa	0	0	0	9
Isocitrate dehydrogenase [NADP] OS=Felis catus GN=IDH1 PE=3 SV=1	tr|M3W1B8|M3W1B8_FELCA	47 kDa	0	36	0	0
Hexosyltransferase OS=Felis catus GN=B3GALT4 PE=3 SV=1	tr|M3W1E3|M3W1E3_FELCA	43 kDa	0	2	0	0
Bleomycin hydrolase OS=Felis catus GN=BLMH PE=4 SV=1	tr|M3W1G9|M3W1G9_FELCA	52 kDa	0	17	0	0
Uncharacterized protein OS=Felis catus PE=4 SV=1	tr|M3W1L8|M3W1L8_FELCA	35 kDa	0	0	0	6
Tripeptidyl peptidase 2 OS=Felis catus GN=TPP2 PE=4 SV=1	tr|M3W1R8|M3W1R8_FELCA	140 kDa	0	0	0	3
Adaptor related protein complex 1 mu 2 subunit OS=Felis catus GN=AP1M2 PE=3 SV=1	tr|M3W1V5|M3W1V5_FELCA	47 kDa	0	7	0	0
Ubiquitinyl hydrolase 1 OS=Felis catus GN=USP5 PE=3 SV=1	tr|M3W1X0|M3W1X0_FELCA	96 kDa	0	0	0	15
Enolase 2 OS=Felis catus GN=ENO2 PE=3 SV=1	tr|M3W1X4|M3W1X4_FELCA	47 kDa	0	17	0	0
Aldehyde dehydrogenase 9 family member A1 OS=Felis catus GN=ALDH9A1 PE=3 SV=1	tr|M3W1Z4|M3W1Z4_FELCA	56 kDa	0	19	19	6
Uncharacterized protein OS=Felis catus PE=4 SV=1	tr|M3W235|M3W235_FELCA	39 kDa	0	0	0	7
Phosphatidylinositol-3,4,5-trisphosphate dependent Rac exchange factor 1 OS=Felis catus GN=PREX1 PE=4 SV=1	tr|M3W258|M3W258_FELCA	179 kDa	0	3	0	0
Adaptor related protein complex 2 alpha 1 subunit OS=Felis catus GN=AP2A1 PE=4 SV=1	tr|M3W262|M3W262_FELCA	108 kDa	0	0	11	39
Actinin alpha 2 OS=Felis catus GN=ACTN2 PE=4 SV=1	tr|M3W273|M3W273_FELCA	101 kDa	0	0	0	19
Dihydrolipoyl dehydrogenase OS=Felis catus GN=DLD PE=3 SV=1	tr|M3W291|M3W291_FELCA	54 kDa	0	0	4	0
Solute carrier family 44 member 4 OS=Felis catus GN=SLC44A4 PE=3 SV=1	tr|M3W2B6|M3W2B6_FELCA	79 kDa	0	0	0	3
Uncharacterized protein OS=Felis catus PE=3 SV=1	tr|M3W2B8|M3W2B8_FELCA	141 kDa	0	0	0	13
Lysosomal associated membrane protein 2 OS=Felis catus GN=LAMP2 PE=3 SV=1	tr|M3W2D0|M3W2D0_FELCA (+1)	45 kDa	0	0	0	9
Hemopexin OS=Felis catus GN=HPX PE=4 SV=1	tr|M3W2J4|M3W2J4_FELCA	52 kDa	0	4	27	0
DEAD-box helicase 1 OS=Felis catus GN=DDX1 PE=4 SV=1	tr|M3W2M4|M3W2M4_FELCA	84 kDa	0	0	0	8
WASH complex subunit 5 OS=Felis catus GN=WASHC5 PE=4 SV=1	tr|M3W2M5|M3W2M5_FELCA	135 kDa	0	0	0	41
ArfGAP with RhoGAP domain, ankyrin repeat and PH domain 2 OS=Felis catus GN=ARAP2 PE=4 SV=1	tr|M3W2Q2|M3W2Q2_FELCA	194 kDa	0	2	0	0
Basal cell adhesion molecule (Lutheran blood group) OS=Felis catus GN=BCAM PE=4 SV=1	tr|M3W2U8|M3W2U8_FELCA	65 kDa	0	0	0	3
Transglutaminase 2 OS=Felis catus GN=TGM2 PE=4 SV=1	tr|M3W2W5|M3W2W5_FELCA	77 kDa	0	6	4	14
GC, vitamin D binding protein OS=Felis catus GN=GC PE=3 SV=1	tr|M3W2Z1|M3W2Z1_FELCA	53 kDa	0	41	13	0
Solute carrier family 44 member 2 OS=Felis catus GN=SLC44A2 PE=3 SV=1	tr|M3W313|M3W313_FELCA	80 kDa	0	0	0	5
Protein kinase C substrate 80K-H OS=Felis catus GN=PRKCSH PE=4 SV=1	tr|M3W340|M3W340_FELCA (+1)	59 kDa	0	0	0	5
Hexokinase 1 OS=Felis catus GN=HK1 PE=3 SV=1	tr|M3W346|M3W346_FELCA	103 kDa	0	0	0	35
ARP2 actin related protein 2 homolog OS=Felis catus GN=ACTR2 PE=3 SV=1	tr|M3W369|M3W369_FELCA	45 kDa	0	14	0	0
Aminopeptidase OS=Felis catus GN=ERAP1 PE=3 SV=1	tr|M3W374|M3W374_FELCA	107 kDa	0	0	0	10
Methionine aminopeptidase OS=Felis catus GN=METAP1 PE=3 SV=1	tr|M3W399|M3W399_FELCA	39 kDa	0	4	0	0
Splicing factor 3b subunit 1 OS=Felis catus GN=SF3B1 PE=4 SV=1	tr|M3W3C6|M3W3C6_FELCA	146 kDa	0	0	0	24
Glycoprotein A33 OS=Felis catus GN=GPA33 PE=4 SV=1	tr|M3W3J6|M3W3J6_FELCA	35 kDa	0	2	0	0
Adenosylhomocysteinase OS=Felis catus GN=AHCYL1 PE=3 SV=1	tr|M3W3K3|M3W3K3_FELCA (+1)	59 kDa	0	0	4	2
Succinyl-CoA:3-ketoacid-coenzyme A transferase OS=Felis catus GN=OXCT1 PE=3 SV=1	tr|M3W3N3|M3W3N3_FELCA	57 kDa	0	0	9	0
Formin like 2 OS=Felis catus GN=FMNL2 PE=4 SV=1	tr|M3W3Q3|M3W3Q3_FELCA (+1)	120 kDa	0	0	0	2
FAM20B, glycosaminoglycan xylosylkinase OS=Felis catus GN=FAM20B PE=4 SV=1	tr|M3W3U4|M3W3U4_FELCA	46 kDa	0	11	0	0
Inositol polyphosphate phosphatase like 1 OS=Felis catus GN=INPPL1 PE=4 SV=1	tr|M3W3V8|M3W3V8_FELCA (+1)	138 kDa	0	0	0	2
Eukaryotic translation initiation factor 3 subunit B OS=Felis catus GN=EIF3B PE=3 SV=1	tr|M3W3Z6|M3W3Z6_FELCA	94 kDa	0	0	0	51
Elongation factor Tu GTP binding domain containing 2 OS=Felis catus GN=EFTUD2 PE=4 SV=1	tr|M3W441|M3W441_FELCA	109 kDa	0	0	0	30
Glycylpeptide N-tetradecanoyltransferase OS=Felis catus GN=NMT1 PE=3 SV=1	tr|M3W445|M3W445_FELCA	57 kDa	0	0	3	0
Fumarate hydratase OS=Felis catus GN=FH PE=3 SV=1	tr|M3W459|M3W459_FELCA	50 kDa	0	18	0	0
Phosphatidylinositol-5-phosphate 4-kinase type 2 alpha OS=Felis catus GN=PIP4K2A PE=4 SV=1	tr|M3W460|M3W460_FELCA	46 kDa	0	3	0	0
Proteasome 26S subunit, non-ATPase 4 OS=Felis catus GN=PSMD4 PE=4 SV=1	tr|M3W4A2|M3W4A2_FELCA	41 kDa	0	0	4	0
WD repeat domain 77 OS=Felis catus GN=WDR77 PE=4 SV=1	tr|M3W4G4|M3W4G4_FELCA	37 kDa	0	3	0	0
Integrin subunit alpha V OS=Felis catus GN=ITGAV PE=3 SV=1	tr|M3W4G7|M3W4G7_FELCA	111 kDa	0	0	0	6
Cell cycle and apoptosis regulator 2 OS=Felis catus GN=CCAR2 PE=4 SV=1	tr|M3W4H2|M3W4H2_FELCA	102 kDa	0	0	0	7
Phosphoacetylglucosamine mutase OS=Felis catus GN=PGM3 PE=3 SV=1	tr|M3W4K3|M3W4K3_FELCA	60 kDa	0	0	6	0
Signal recognition particle subunit SRP68 OS=Felis catus GN=SRP68 PE=3 SV=1	tr|M3W4N6|M3W4N6_FELCA	70 kDa	0	0	0	2
Poly [ADP-ribose] polymerase OS=Felis catus GN=PARP1 PE=4 SV=1	tr|M3W4P6|M3W4P6_FELCA	112 kDa	0	0	5	34
Sorting nexin 5 OS=Felis catus GN=SNX5 PE=4 SV=1	tr|M3W4Q8|M3W4Q8_FELCA	45 kDa	0	14	0	0
Haptoglobin OS=Felis catus GN=HP PE=3 SV=1	tr|M3W4S3|M3W4S3_FELCA	38 kDa	0	30	21	0
Spectrin alpha, non-erythrocytic 1 OS=Felis catus GN=SPTAN1 PE=4 SV=1	tr|M3W4T6|M3W4T6_FELCA	285 kDa	0	0	0	55
Kynurenine aminotransferase 1 OS=Felis catus GN=KYAT1 PE=4 SV=1	tr|M3W4U9|M3W4U9_FELCA	56 kDa	0	3	0	0
CD44 molecule (Indian blood group) OS=Felis catus GN=CD44 PE=4 SV=1	tr|M3W4X0|M3W4X0_FELCA	81 kDa	0	0	0	5
Stress induced phosphoprotein 1 OS=Felis catus GN=STIP1 PE=4 SV=1	tr|M3W501|M3W501_FELCA	62 kDa	0	0	4	0
Hemochromatosis OS=Felis catus GN=HFE PE=3 SV=1	tr|M3W522|M3W522_FELCA	39 kDa	0	8	2	0
Secreted protein acidic and cysteine rich OS=Felis catus GN=SPARC PE=4 SV=1	tr|M3W550|M3W550_FELCA	37 kDa	0	4	0	0
EGF domain specific O-linked N-acetylglucosamine transferase OS=Felis catus GN=EOGT PE=4 SV=1	tr|M3W586|M3W586_FELCA	62 kDa	0	0	14	0
Ubiquitin like modifier activating enzyme 6 OS=Felis catus GN=UBA6 PE=4 SV=1	tr|M3W5E9|M3W5E9_FELCA	116 kDa	0	0	0	2
Uncharacterized protein OS=Felis catus GN=LOC101081363 PE=4 SV=1	tr|M3W5L9|M3W5L9_FELCA	71 kDa	0	0	0	4
Myosin IC OS=Felis catus GN=MYO1C PE=3 SV=1	tr|M3W5M2|M3W5M2_FELCA	122 kDa	0	0	0	46
Serpin family F member 2 OS=Felis catus GN=SERPINF2 PE=3 SV=1	tr|M3W5N0|M3W5N0_FELCA	55 kDa	0	0	4	0
Neuroplastin OS=Felis catus GN=NPTN PE=4 SV=1	tr|M3W5R1|M3W5R1_FELCA	44 kDa	0	0	6	2
Uncharacterized protein OS=Felis catus PE=4 SV=1	tr|M3W5R2|M3W5R2_FELCA	41 kDa	0	0	0	2
Uncharacterized protein OS=Felis catus PE=4 SV=1	tr|M3W5R5|M3W5R5_FELCA	159 kDa	0	0	0	17
Dihydrolipoamide S-succinyltransferase OS=Felis catus GN=DLST PE=4 SV=1	tr|M3W5T1|M3W5T1_FELCA	49 kDa	0	0	5	0
Uncharacterized protein OS=Felis catus PE=4 SV=1	tr|M3W5Z5|M3W5Z5_FELCA	52 kDa	0	3	0	0
Milk fat globule-EGF factor 8 protein OS=Felis catus GN=MFGE8 PE=4 SV=1	tr|M3W678|M3W678_FELCA	50 kDa	0	8	2	0
Matrix metalloproteinase OS=Felis catus GN=MMP14 PE=3 SV=1	tr|M3W681|M3W681_FELCA	66 kDa	0	0	5	0
Serpin family G member 1 OS=Felis catus GN=SERPING1 PE=3 SV=1	tr|M3W683|M3W683_FELCA	57 kDa	0	0	0	3
Catenin delta 1 OS=Felis catus GN=CTNND1 PE=4 SV=1	tr|M3W695|M3W695_FELCA	104 kDa	0	0	0	3
Nebulin OS=Felis catus GN=NEB PE=4 SV=1	tr|M3W6H8|M3W6H8_FELCA	774 kDa	0	0	2	0
Procollagen C-endopeptidase enhancer OS=Felis catus GN=PCOLCE PE=4 SV=1	tr|M3W6K9|M3W6K9_FELCA	49 kDa	0	5	9	0
Nucleosome assembly protein 1 like 4 OS=Felis catus GN=NAP1L4 PE=3 SV=1	tr|M3W6T3|M3W6T3_FELCA	44 kDa	0	0	11	0
Epoxide hydrolase OS=Felis catus GN=EPHX1 PE=3 SV=1	tr|M3W6U2|M3W6U2_FELCA	52 kDa	0	28	0	0
Tyrosine-protein kinase OS=Felis catus GN=SRC PE=3 SV=1	tr|M3W6V8|M3W6V8_FELCA	60 kDa	0	2	7	2
Activated leukocyte cell adhesion molecule OS=Felis catus GN=ALCAM PE=4 SV=1	tr|M3W6Y7|M3W6Y7_FELCA	65 kDa	0	0	0	3
SEC24 homolog D, COPII coat complex component OS=Felis catus GN=SEC24D PE=4 SV=1	tr|M3W714|M3W714_FELCA	104 kDa	0	0	0	8
Testis expressed 101 OS=Felis catus GN=TEX101 PE=4 SV=1	tr|M3W785|M3W785_FELCA	28 kDa	0	2	0	0
KDEL motif containing 2 OS=Felis catus GN=KDELC2 PE=4 SV=1	tr|M3W7D3|M3W7D3_FELCA	52 kDa	0	0	3	0
WD repeat domain 18 OS=Felis catus GN=WDR18 PE=4 SV=1	tr|M3W7H8|M3W7H8_FELCA	48 kDa	0	2	0	0
Syntaxin 3 OS=Felis catus GN=STX3 PE=3 SV=1	tr|M3W7W0|M3W7W0_FELCA	33 kDa	0	2	0	0
Heat shock protein family H (Hsp110) member 1 OS=Felis catus GN=HSPH1 PE=3 SV=1	tr|M3W7W7|M3W7W7_FELCA	93 kDa	0	0	0	8
Uncharacterized protein OS=Felis catus GN=SQRDL PE=4 SV=1	tr|M3W7Y3|M3W7Y3_FELCA	50 kDa	0	4	0	0
Ribonuclease/angiogenin inhibitor 1 OS=Felis catus GN=RNH1 PE=4 SV=1	tr|M3W7Z5|M3W7Z5_FELCA	56 kDa	0	6	0	0
Stromal cell derived factor 4 OS=Felis catus GN=SDF4 PE=4 SV=1	tr|M3W808|M3W808_FELCA	43 kDa	0	9	0	0
Tubulin beta chain OS=Felis catus PE=3 SV=1	tr|M3W868|M3W868_FELCA	49 kDa	0	0	32	0
Flotillin 1 OS=Felis catus GN=FLOT1 PE=4 SV=1	tr|M3W869|M3W869_FELCA	48 kDa	0	4	0	0
Uncharacterized protein OS=Felis catus PE=4 SV=1	tr|M3W898|M3W898_FELCA	73 kDa	0	0	0	29
Ubiquinol-cytochrome c reductase core protein II OS=Felis catus GN=UQCRC2 PE=3 SV=1	tr|M3W8B7|M3W8B7_FELCA	43 kDa	0	20	0	0
Polypeptide N-acetylgalactosaminyltransferase OS=Felis catus GN=GALNT2 PE=3 SV=1	tr|M3W8C0|M3W8C0_FELCA	65 kDa	0	0	17	0
Proteasome 26S subunit, non-ATPase 2 OS=Felis catus GN=PSMD2 PE=4 SV=1	tr|M3W8D9|M3W8D9_FELCA	100 kDa	0	2	0	36
Uncharacterized protein OS=Felis catus GN=EIF4G1 PE=4 SV=1	tr|M3W8E0|M3W8E0_FELCA	177 kDa	0	0	0	2
Methylenetetrahydrofolate dehydrogenase, cyclohydrolase and formyltetrahydrofolate synthetase 1 OS=Felis catus GN=MTHFD1 PE=3 SV=1	tr|M3W8F9|M3W8F9_FELCA	101 kDa	0	2	0	65
Heat shock protein family A (Hsp70) member 2 OS=Felis catus GN=HSPA2 PE=3 SV=1	tr|M3W8G1|M3W8G1_FELCA	70 kDa	0	0	17	10
Uncharacterized protein OS=Felis catus GN=CTSD PE=3 SV=1	tr|M3W8G3|M3W8G3_FELCA	43 kDa	0	6	0	0
Uncharacterized protein OS=Felis catus PE=4 SV=1	tr|M3W8H0|M3W8H0_FELCA	23 kDa	0	14	2	0
Kynurenine aminotransferase 3 OS=Felis catus GN=KYAT3 PE=4 SV=1	tr|M3W8I7|M3W8I7_FELCA	51 kDa	0	5	0	0
Uncharacterized protein OS=Felis catus GN=CD34 PE=4 SV=1	tr|M3W8J9|M3W8J9_FELCA	40 kDa	0	0	4	15
Dynein cytoplasmic 1 light intermediate chain 1 OS=Felis catus GN=DYNC1LI1 PE=4 SV=1	tr|M3W8M1|M3W8M1_FELCA	57 kDa	0	7	0	0
Uncharacterized protein OS=Felis catus GN=SHPK PE=4 SV=1	tr|M3W8M5|M3W8M5_FELCA	51 kDa	0	2	0	0
Creatine kinase B OS=Felis catus GN=CKB PE=3 SV=1	tr|M3W8P6|M3W8P6_FELCA (+1)	43 kDa	0	33	6	0
Glutamate dehydrogenase OS=Felis catus GN=GLUD1 PE=3 SV=1	tr|M3W8Q7|M3W8Q7_FELCA	47 kDa	0	5	15	0
Peptidase D OS=Felis catus GN=PEPD PE=3 SV=1	tr|M3W8R0|M3W8R0_FELCA	54 kDa	0	0	6	0
Beta-1,4-galactosyltransferase 4 OS=Felis catus GN=B4GALT4 PE=4 SV=1	tr|M3W8S5|M3W8S5_FELCA	40 kDa	0	27	0	0
Uncharacterized protein OS=Felis catus PE=4 SV=1	tr|M3W8S9|M3W8S9_FELCA	46 kDa	0	7	0	0
Phosphoglucomutase 5 OS=Felis catus GN=PGM5 PE=3 SV=1	tr|M3W8V6|M3W8V6_FELCA	45 kDa	0	0	15	0
Uncharacterized protein OS=Felis catus GN=FCGR2B PE=4 SV=1	tr|M3W929|M3W929_FELCA	35 kDa	0	5	0	0
Interleukin enhancer binding factor 2 OS=Felis catus GN=ILF2 PE=4 SV=1	tr|M3W936|M3W936_FELCA	43 kDa	0	18	0	0
Complement factor properdin OS=Felis catus GN=CFP PE=4 SV=1	tr|M3W950|M3W950_FELCA	51 kDa	0	0	4	0
Dolichyl-diphosphooligosaccharide--protein glycosyltransferase subunit 1 OS=Felis catus GN=RPN1 PE=3 SV=1	tr|M3W966|M3W966_FELCA	60 kDa	0	0	6	5
Eukaryotic translation initiation factor 4A3 OS=Felis catus GN=EIF4A3 PE=3 SV=1	tr|M3W982|M3W982_FELCA	41 kDa	0	11	0	0
Dipeptidyl peptidase 7 OS=Felis catus GN=DPP7 PE=4 SV=1	tr|M3W989|M3W989_FELCA	57 kDa	0	0	5	0
Fructose-bisphosphate aldolase OS=Felis catus GN=ALDOC PE=3 SV=1	tr|M3W9A0|M3W9A0_FELCA	39 kDa	0	25	0	0
Carnosine dipeptidase 2 OS=Felis catus GN=CNDP2 PE=4 SV=1	tr|M3W9A2|M3W9A2_FELCA	53 kDa	0	9	18	2
Staphylococcal nuclease and tudor domain containing 1 OS=Felis catus GN=SND1 PE=4 SV=1	tr|M3W9B3|M3W9B3_FELCA	102 kDa	0	0	0	38
Uncharacterized protein OS=Felis catus GN=LOC101080954 PE=4 SV=1	tr|M3W9F0|M3W9F0_FELCA	84 kDa	0	0	0	5
Chromosome 16 open reading frame 62 OS=Felis catus GN=C16orf62 PE=4 SV=1	tr|M3W9G7|M3W9G7_FELCA	110 kDa	0	0	0	12
Vitronectin OS=Felis catus GN=VTN PE=4 SV=1	tr|M3W9I5|M3W9I5_FELCA	54 kDa	0	0	2	8
Alpha-1,4 glucan phosphorylase OS=Felis catus GN=PYGB PE=3 SV=1	tr|M3W9K0|M3W9K0_FELCA	97 kDa	0	0	0	46
Hydroxysteroid 17-beta dehydrogenase 4 OS=Felis catus GN=HSD17B4 PE=4 SV=1	tr|M3W9K8|M3W9K8_FELCA	81 kDa	0	6	0	0
Flavin-containing monooxygenase OS=Felis catus GN=FMO2 PE=3 SV=1	tr|M3W9L1|M3W9L1_FELCA	61 kDa	0	0	14	0
Lysine--tRNA ligase OS=Felis catus GN=KARS PE=3 SV=1	tr|M3W9U6|M3W9U6_FELCA	68 kDa	0	0	3	0
Phosphorylase kinase regulatory subunit beta OS=Felis catus GN=PHKB PE=4 SV=1	tr|M3W9V0|M3W9V0_FELCA	122 kDa	0	0	0	10
Dynactin subunit 1 OS=Felis catus GN=DCTN1 PE=4 SV=1	tr|M3W9X0|M3W9X0_FELCA	139 kDa	0	0	0	14
Protein disulfide-isomerase A4 OS=Felis catus GN=PDIA4 PE=3 SV=1	tr|M3W9X1|M3W9X1_FELCA	73 kDa	0	4	12	8
Heat shock protein family A (Hsp70) member 4 like OS=Felis catus GN=HSPA4L PE=3 SV=1	tr|M3W9Y3|M3W9Y3_FELCA	98 kDa	0	0	0	42
Serpin family B member 1 OS=Felis catus GN=SERPINB1 PE=3 SV=1	tr|M3WA16|M3WA16_FELCA	43 kDa	0	6	0	0
Plastin 3 OS=Felis catus GN=PLS3 PE=4 SV=1	tr|M3WA30|M3WA30_FELCA	71 kDa	0	0	15	0
Leucyl-tRNA synthetase OS=Felis catus GN=LARS PE=3 SV=1	tr|M3WA40|M3WA40_FELCA	135 kDa	0	0	0	2
DnaJ heat shock protein family (Hsp40) member A1 OS=Felis catus GN=DNAJA1 PE=3 SV=1	tr|M3WA49|M3WA49_FELCA	45 kDa	0	19	0	0
Uncharacterized protein OS=Felis catus PE=3 SV=1	tr|M3WA72|M3WA72_FELCA	160 kDa	0	0	2	0
RuvB-like helicase OS=Felis catus GN=RUVBL1 PE=3 SV=1	tr|M3WAA5|M3WAA5_FELCA	50 kDa	0	7	29	2
Polypeptide N-acetylgalactosaminyltransferase OS=Felis catus GN=GALNT12 PE=3 SV=1	tr|M3WAB2|M3WAB2_FELCA	56 kDa	0	0	3	0
Galactosylgalactosylxylosylprotein 3-beta-glucuronosyltransferase OS=Felis catus GN=B3GAT3 PE=3 SV=1	tr|M3WAD0|M3WAD0_FELCA	37 kDa	0	2	0	0
Glucosidase II alpha subunit OS=Felis catus GN=GANAB PE=3 SV=1	tr|M3WAD1|M3WAD1_FELCA	109 kDa	0	2	0	59
Uncharacterized protein OS=Felis catus PE=4 SV=1	tr|M3WAH7|M3WAH7_FELCA	469 kDa	0	0	0	23
Exportin 7 OS=Felis catus GN=XPO7 PE=4 SV=1	tr|M3WAJ4|M3WAJ4_FELCA	124 kDa	0	0	0	15
Aminopeptidase OS=Felis catus GN=ANPEP PE=3 SV=1	tr|M3WAK1|M3WAK1_FELCA	109 kDa	0	0	0	40
Dihydropyrimidinase OS=Felis catus GN=DPYS PE=4 SV=1	tr|M3WAK7|M3WAK7_FELCA	48 kDa	0	0	12	0
Adaptor related protein complex 1 mu 1 subunit OS=Felis catus GN=AP1M1 PE=3 SV=1	tr|M3WAM2|M3WAM2_FELCA	50 kDa	0	8	0	0
Fascin OS=Felis catus GN=FSCN1 PE=3 SV=1	tr|M3WAN2|M3WAN2_FELCA	49 kDa	0	5	19	0
SEL1L ERAD E3 ligase adaptor subunit OS=Felis catus GN=SEL1L PE=4 SV=1	tr|M3WAN5|M3WAN5_FELCA	89 kDa	0	0	0	4
Platelet-derived growth factor receptor alpha OS=Felis catus GN=PDGFRA PE=3 SV=1	tr|M3WAV8|M3WAV8_FELCA	123 kDa	0	0	0	7
DEAH-box helicase 15 OS=Felis catus GN=DHX15 PE=4 SV=1	tr|M3WB16|M3WB16_FELCA	91 kDa	0	0	0	2
Tyrosine-protein kinase OS=Felis catus GN=YES1 PE=3 SV=1	tr|M3WB17|M3WB17_FELCA	61 kDa	0	0	6	0
Olfactomedin like 3 OS=Felis catus GN=OLFML3 PE=4 SV=1	tr|M3WB23|M3WB23_FELCA	46 kDa	0	0	0	2
Delta-aminolevulinic acid dehydratase OS=Felis catus GN=ALAD PE=3 SV=1	tr|M3WB25|M3WB25_FELCA	36 kDa	0	2	0	0
Trifunctional purine biosynthetic protein adenosine-3 OS=Felis catus GN=GART PE=3 SV=1	tr|M3WB84|M3WB84_FELCA	108 kDa	0	3	0	27
Sodium/potassium-transporting ATPase subunit beta OS=Felis catus GN=ATP1B1 PE=3 SV=1	tr|M3WB86|M3WB86_FELCA	35 kDa	0	12	11	0
Secernin 2 OS=Felis catus GN=SCRN2 PE=4 SV=1	tr|M3WBA3|M3WBA3_FELCA	48 kDa	0	2	0	0
Eukaryotic translation initiation factor 3 subunit G OS=Felis catus GN=EIF3G PE=3 SV=1	tr|M3WBC3|M3WBC3_FELCA	35 kDa	0	7	0	0
Septin 9 OS=Felis catus GN=SEPT9 PE=3 SV=1	tr|M3WBC8|M3WBC8_FELCA	66 kDa	0	6	6	0
Sushi domain containing 2 OS=Felis catus GN=SUSD2 PE=4 SV=1	tr|M3WBD8|M3WBD8_FELCA	90 kDa	0	7	23	0
Intercellular adhesion molecule 1 OS=Felis catus GN=ICAM1 PE=4 SV=1	tr|M3WBF1|M3WBF1_FELCA	58 kDa	0	0	0	6
Glycerol-3-phosphate dehydrogenase [NAD(+)] OS=Felis catus GN=GPD1 PE=3 SV=1	tr|M3WBH7|M3WBH7_FELCA	38 kDa	0	3	0	0
Alanyl-tRNA synthetase OS=Felis catus GN=AARS PE=3 SV=1	tr|M3WBJ0|M3WBJ0_FELCA (+1)	107 kDa	0	0	0	29
CD47 molecule OS=Felis catus GN=CD47 PE=4 SV=1	tr|M3WBM1|M3WBM1_FELCA	34 kDa	0	0	0	2
UDP-glucose 6-dehydrogenase OS=Felis catus GN=UGDH PE=3 SV=1	tr|M3WBQ9|M3WBQ9_FELCA	55 kDa	0	0	12	0
Sodium/potassium-transporting ATPase subunit beta OS=Felis catus GN=ATP1B2 PE=3 SV=1	tr|M3WBS4|M3WBS4_FELCA	33 kDa	0	0	3	0
Inositol-3-phosphate synthase 1 OS=Felis catus GN=ISYNA1 PE=4 SV=1	tr|M3WC06|M3WC06_FELCA	61 kDa	0	2	15	11
UPF1, RNA helicase and ATPase OS=Felis catus GN=UPF1 PE=4 SV=1	tr|M3WC21|M3WC21_FELCA	119 kDa	0	0	0	2
Solute carrier family 29 member 1 (Augustine blood group) OS=Felis catus GN=SLC29A1 PE=4 SV=1	tr|M3WC26|M3WC26_FELCA	50 kDa	0	2	0	0
Heat shock protein 90 alpha family class B member 1 OS=Felis catus GN=HSP90AB1 PE=3 SV=1	tr|M3WC29|M3WC29_FELCA	83 kDa	0	0	0	25
Eukaryotic translation initiation factor 5B OS=Felis catus GN=EIF5B PE=4 SV=1	tr|M3WC43|M3WC43_FELCA	138 kDa	0	0	0	3
Glutaminyl-tRNA synthetase OS=Felis catus GN=QARS PE=3 SV=1	tr|M3WC86|M3WC86_FELCA	88 kDa	0	0	4	8
Myoferlin OS=Felis catus GN=MYOF PE=4 SV=1	tr|M3WCE4|M3WCE4_FELCA	232 kDa	0	0	0	12
Tryptophanyl-tRNA synthetase OS=Felis catus GN=WARS PE=3 SV=1	tr|M3WCI7|M3WCI7_FELCA	53 kDa	0	2	14	3
CD5 molecule like OS=Felis catus GN=CD5L PE=4 SV=1	tr|M3WCL4|M3WCL4_FELCA	39 kDa	0	3	0	0
Proteasome 26S subunit, non-ATPase 1 OS=Felis catus GN=PSMD1 PE=4 SV=1	tr|M3WCN2|M3WCN2_FELCA	106 kDa	0	0	0	72
Protein kinase C and casein kinase substrate in neurons 2 OS=Felis catus GN=PACSIN2 PE=4 SV=1	tr|M3WCP1|M3WCP1_FELCA	54 kDa	0	5	0	0
TROVE domain family member 2 OS=Felis catus GN=TROVE2 PE=4 SV=1	tr|M3WCT3|M3WCT3_FELCA	61 kDa	0	0	6	0
Inositol monophosphatase domain containing 1 OS=Felis catus GN=IMPAD1 PE=4 SV=1	tr|M3WCT5|M3WCT5_FELCA	36 kDa	0	15	0	0
Coiled-coil domain containing 170 OS=Felis catus GN=CCDC170 PE=4 SV=1	tr|M3WCV7|M3WCV7_FELCA	80 kDa	0	0	0	2
Serpin family A member 1 OS=Felis catus GN=SERPINA1 PE=3 SV=1	tr|M3WCX1|M3WCX1_FELCA	47 kDa	0	0	15	0
Oxoglutarate dehydrogenase OS=Felis catus GN=OGDH PE=4 SV=1	tr|M3WCZ2|M3WCZ2_FELCA	116 kDa	0	0	0	22
Tubulin beta chain OS=Felis catus GN=TUBB4A PE=3 SV=1	tr|M3WCZ3|M3WCZ3_FELCA	41 kDa	0	0	42	0
Propionyl-CoA carboxylase beta subunit OS=Felis catus GN=PCCB PE=4 SV=1	tr|M3WD59|M3WD59_FELCA	59 kDa	0	0	2	0
Protein phosphatase 1 regulatory subunit 7 OS=Felis catus GN=PPP1R7 PE=4 SV=1	tr|M3WDA6|M3WDA6_FELCA	41 kDa	0	4	0	0
Ski2 like RNA helicase 2 OS=Felis catus GN=SKIV2L2 PE=4 SV=1	tr|M3WDJ1|M3WDJ1_FELCA	118 kDa	0	0	0	4
Saccharopine dehydrogenase (putative) OS=Felis catus GN=SCCPDH PE=4 SV=1	tr|M3WDM6|M3WDM6_FELCA	43 kDa	0	16	0	0
Eukaryotic translation initiation factor 3 subunit A OS=Felis catus GN=EIF3A PE=3 SV=1	tr|M3WDN7|M3WDN7_FELCA	158 kDa	0	0	0	113
GDP-mannose pyrophosphorylase B OS=Felis catus GN=GMPPB PE=4 SV=1	tr|M3WDQ0|M3WDQ0_FELCA	43 kDa	0	11	0	0
Prominin 2 OS=Felis catus GN=PROM2 PE=4 SV=1	tr|M3WDQ9|M3WDQ9_FELCA	93 kDa	0	0	0	21
Tyrosylprotein sulfotransferase 2 OS=Felis catus GN=TPST2 PE=4 SV=1	tr|M3WDS7|M3WDS7_FELCA	38 kDa	0	0	0	24
Aldehyde dehydrogenase 1 family member A3 OS=Felis catus GN=ALDH1A3 PE=3 SV=1	tr|M3WDT8|M3WDT8_FELCA (+1)	54 kDa	0	0	15	0
Inositol polyphosphate-5-phosphatase A OS=Felis catus GN=INPP5A PE=4 SV=1	tr|M3WE58|M3WE58_FELCA	48 kDa	0	9	0	0
SEC24 homolog C, COPII coat complex component OS=Felis catus GN=SEC24C PE=4 SV=1	tr|M3WE89|M3WE89_FELCA	111 kDa	0	0	0	6
Protein kinase cAMP-dependent type I regulatory subunit alpha OS=Felis catus GN=PRKAR1A PE=4 SV=1	tr|M3WEB2|M3WEB2_FELCA	43 kDa	0	3	2	0
CD38 molecule OS=Felis catus GN=CD38 PE=4 SV=1	tr|M3WEJ2|M3WEJ2_FELCA	29 kDa	0	0	5	0
Calcium/calmodulin dependent serine protein kinase OS=Felis catus GN=CASK PE=4 SV=1	tr|M3WEK7|M3WEK7_FELCA	105 kDa	0	0	0	10
Vasorin OS=Felis catus GN=VASN PE=4 SV=1	tr|M3WEQ2|M3WEQ2_FELCA	72 kDa	0	0	0	2
Tubulin alpha chain OS=Felis catus GN=LOC101090556 PE=3 SV=1	tr|M3WER4|M3WER4_FELCA	50 kDa	0	0	35	0
Aspartyl aminopeptidase OS=Felis catus GN=DNPEP PE=3 SV=1	tr|M3WER7|M3WER7_FELCA	52 kDa	0	27	33	11
Desmin OS=Felis catus GN=DES PE=3 SV=1	tr|M3WER8|M3WER8_FELCA	54 kDa	0	6	0	0
ST3 beta-galactoside alpha-2,3-sialyltransferase 4 OS=Felis catus GN=ST3GAL4 PE=3 SV=1	tr|M3WET3|M3WET3_FELCA	38 kDa	0	0	3	0
Ankyrin repeat domain 28 OS=Felis catus GN=ANKRD28 PE=4 SV=1	tr|M3WEV6|M3WEV6_FELCA	112 kDa	0	0	0	3
Uncharacterized protein OS=Felis catus GN=PSMC1 PE=3 SV=1	tr|M3WEV7|M3WEV7_FELCA	49 kDa	0	0	8	8
WD repeat domain 1 OS=Felis catus GN=WDR1 PE=4 SV=1	tr|M3WEW2|M3WEW2_FELCA	66 kDa	0	0	4	0
FACT complex subunit SSRP1 OS=Felis catus GN=SSRP1 PE=3 SV=1	tr|M3WEX8|M3WEX8_FELCA	81 kDa	0	0	3	0
Mannosidase alpha class 2C member 1 OS=Felis catus GN=MAN2C1 PE=4 SV=1	tr|M3WEZ3|M3WEZ3_FELCA	115 kDa	0	0	0	46
Coatomer subunit beta OS=Felis catus GN=COPB1 PE=4 SV=1	tr|M3WF04|M3WF04_FELCA	107 kDa	0	0	0	44
Transketolase like 1 OS=Felis catus GN=TKTL1 PE=4 SV=1	tr|M3WF11|M3WF11_FELCA	67 kDa	0	0	3	0
Filamin A OS=Felis catus GN=FLNA PE=4 SV=1	tr|M3WF12|M3WF12_FELCA	281 kDa	0	2	6	56
ATPase H+ transporting accessory protein 1 OS=Felis catus GN=ATP6AP1 PE=4 SV=1	tr|M3WF16|M3WF16_FELCA	42 kDa	0	0	2	0
Rab GDP dissociation inhibitor OS=Felis catus GN=GDI1 PE=3 SV=1	tr|M3WF17|M3WF17_FELCA	51 kDa	0	0	28	0
Uncharacterized protein OS=Felis catus PE=4 SV=1	tr|M3WF21|M3WF21_FELCA	30 kDa	0	6	23	12
Sulfatase modifying factor 1 OS=Felis catus GN=SUMF1 PE=4 SV=1	tr|M3WF85|M3WF85_FELCA (+1)	41 kDa	0	4	0	0
Adenylyl cyclase-associated protein OS=Felis catus GN=CAP2 PE=3 SV=1	tr|M3WFC4|M3WFC4_FELCA	53 kDa	0	0	4	0
Sjogren syndrome antigen B OS=Felis catus GN=SSB PE=4 SV=1	tr|M3WFE1|M3WFE1_FELCA	47 kDa	0	3	0	0
Tubulin gamma chain OS=Felis catus GN=TUBG1 PE=3 SV=1	tr|M3WFJ0|M3WFJ0_FELCA (+1)	51 kDa	0	3	0	0
G protein pathway suppressor 1 OS=Felis catus GN=GPS1 PE=4 SV=1	tr|M3WFJ5|M3WFJ5_FELCA	56 kDa	0	0	14	0
RNA binding motif protein 25 OS=Felis catus GN=RBM25 PE=4 SV=1	tr|M3WFL8|M3WFL8_FELCA	100 kDa	0	0	0	3
Lamin A/C OS=Felis catus GN=LMNA PE=4 SV=1	tr|M3WFR2|M3WFR2_FELCA	68 kDa	0	3	0	0
T-complex protein 1 subunit gamma OS=Felis catus GN=CCT3 PE=3 SV=1	tr|M3WFS1|M3WFS1_FELCA	64 kDa	0	11	35	23
Uncharacterized protein OS=Felis catus PE=4 SV=1	tr|M3WFW0|M3WFW0_FELCA	44 kDa	0	2	3	0
Serum albumin OS=Felis catus GN=ALB PE=3 SV=1	tr|M3WFW6|M3WFW6_FELCA	69 kDa	0	91	257	59
SEC14 like lipid binding 2 OS=Felis catus GN=SEC14L2 PE=4 SV=1	tr|M3WG18|M3WG18_FELCA	46 kDa	0	13	0	0
S-adenosylmethionine synthase OS=Felis catus GN=MAT2A PE=3 SV=1	tr|M3WG37|M3WG37_FELCA	44 kDa	0	15	0	0
Hydroxymethylglutaryl-CoA synthase OS=Felis catus GN=HMGCS1 PE=3 SV=1	tr|M3WG47|M3WG47_FELCA	57 kDa	0	0	0	2
Citrate synthase OS=Felis catus GN=CS PE=3 SV=1	tr|M3WG68|M3WG68_FELCA	52 kDa	0	15	0	0
Uncharacterized protein OS=Felis catus GN=DNAJB11 PE=4 SV=1	tr|M3WG96|M3WG96_FELCA (+1)	40 kDa	0	18	0	0
Alpha 2-HS glycoprotein OS=Felis catus GN=AHSG PE=3 SV=1	tr|M3WG97|M3WG97_FELCA	39 kDa	0	7	13	0
ST6 N-acetylgalactosaminide alpha-2,6-sialyltransferase 2 OS=Felis catus GN=ST6GALNAC2 PE=3 SV=1	tr|M3WGA4|M3WGA4_FELCA	37 kDa	0	0	5	0
Adaptor related protein complex 3 delta 1 subunit OS=Felis catus GN=AP3D1 PE=4 SV=1	tr|M3WGB6|M3WGB6_FELCA	135 kDa	0	0	0	3
Alpha-1,4 glucan phosphorylase OS=Felis catus GN=PYGM PE=3 SV=1	tr|M3WGJ7|M3WGJ7_FELCA	97 kDa	0	0	0	28
Dopa decarboxylase OS=Felis catus GN=DDC PE=3 SV=1	tr|M3WGL5|M3WGL5_FELCA	54 kDa	0	21	14	0
Actin like 6A OS=Felis catus GN=ACTL6A PE=3 SV=1	tr|M3WGS8|M3WGS8_FELCA	47 kDa	0	2	0	0
DnaJ heat shock protein family (Hsp40) member A3 OS=Felis catus GN=DNAJA3 PE=3 SV=1	tr|M3WGU5|M3WGU5_FELCA	52 kDa	0	2	0	0
Myosin ID OS=Felis catus GN=MYO1D PE=3 SV=1	tr|M3WGW9|M3WGW9_FELCA	113 kDa	0	0	0	10
Heat shock protein family A (Hsp70) member 4 OS=Felis catus GN=HSPA4 PE=3 SV=1	tr|M3WGX4|M3WGX4_FELCA	94 kDa	0	0	0	33
Acetyl-CoA acetyltransferase 1 OS=Felis catus GN=ACAT1 PE=3 SV=1	tr|M3WGX6|M3WGX6_FELCA	45 kDa	0	8	0	0
Cystathionine gamma-lyase OS=Felis catus GN=CTH PE=3 SV=1	tr|M3WGZ1|M3WGZ1_FELCA	45 kDa	0	9	0	0
Adenylyl cyclase-associated protein OS=Felis catus GN=CAP1 PE=3 SV=1	tr|M3WH00|M3WH00_FELCA	51 kDa	0	7	55	17
Tropomodulin 3 OS=Felis catus GN=TMOD3 PE=4 SV=1	tr|M3WH67|M3WH67_FELCA	40 kDa	0	6	0	0
Apolipoprotein H OS=Felis catus GN=APOH PE=4 SV=1	tr|M3WH75|M3WH75_FELCA	38 kDa	0	23	34	0
Transducin beta like 2 OS=Felis catus GN=TBL2 PE=4 SV=1	tr|M3WHD4|M3WHD4_FELCA	50 kDa	0	7	0	0
Reversion inducing cysteine rich protein with kazal motifs OS=Felis catus GN=RECK PE=4 SV=1	tr|M3WHJ4|M3WHJ4_FELCA	104 kDa	0	0	0	22
NEDD8-activating enzyme E1 regulatory subunit OS=Felis catus GN=NAE1 PE=3 SV=1	tr|M3WHK1|M3WHK1_FELCA	60 kDa	0	0	4	0
Tetraspanin OS=Felis catus GN=CD82 PE=3 SV=1	tr|M3WHR5|M3WHR5_FELCA	30 kDa	0	4	0	0
Pyruvate dehydrogenase E1 component subunit alpha OS=Felis catus GN=PDHA1 PE=4 SV=1	tr|M3WHU7|M3WHU7_FELCA	43 kDa	0	5	0	0
Fumarylacetoacetate hydrolase OS=Felis catus GN=FAH PE=4 SV=1	tr|M3WHW7|M3WHW7_FELCA	38 kDa	0	4	0	0
Flavin-containing monooxygenase OS=Felis catus GN=FMO5 PE=3 SV=1	tr|M3WI35|M3WI35_FELCA	60 kDa	0	0	8	0
Amine oxidase OS=Felis catus GN=MAOA PE=3 SV=1	tr|M3WI73|M3WI73_FELCA	60 kDa	0	0	7	0
ADAM metallopeptidase domain 7 OS=Felis catus GN=ADAM7 PE=4 SV=1	tr|M3WI75|M3WI75_FELCA	91 kDa	0	2	3	61
Amine oxidase OS=Felis catus GN=AOC3 PE=3 SV=1	tr|M3WIA6|M3WIA6_FELCA	84 kDa	0	0	0	11
Vesicle amine transport 1 OS=Felis catus GN=VAT1 PE=4 SV=1	tr|M3WIA9|M3WIA9_FELCA	43 kDa	0	33	24	3
Myosin heavy chain 11 OS=Felis catus GN=MYH11 PE=3 SV=1	tr|M3WIG9|M3WIG9_FELCA (+1)	228 kDa	0	0	0	34
Fibrinogen beta chain OS=Felis catus GN=FGB PE=4 SV=1	tr|M3WII3|M3WII3_FELCA	56 kDa	0	11	32	9
Capping actin protein of muscle Z-line alpha subunit 1 OS=Felis catus GN=CAPZA1 PE=3 SV=1	tr|M3WIM3|M3WIM3_FELCA	33 kDa	0	5	0	0
Endoplasmic reticulum lectin 1 OS=Felis catus GN=ERLEC1 PE=4 SV=1	tr|M3WIQ5|M3WIQ5_FELCA	55 kDa	0	13	0	0
PDZ domain containing 1 OS=Felis catus GN=PDZK1 PE=4 SV=1	tr|M3WIQ9|M3WIQ9_FELCA	57 kDa	0	5	6	0
ATPase H+ transporting V1 subunit B2 OS=Felis catus GN=ATP6V1B2 PE=3 SV=1	tr|M3WIR6|M3WIR6_FELCA	57 kDa	0	4	19	0
Sodium/potassium-transporting ATPase subunit alpha OS=Felis catus GN=ATP1A1 PE=3 SV=1	tr|M3WIR8|M3WIR8_FELCA	111 kDa	0	0	0	32
Uncharacterized protein OS=Felis catus GN=EPCAM PE=4 SV=1	tr|M3WIV4|M3WIV4_FELCA	35 kDa	0	19	5	0
Ataxin 10 OS=Felis catus GN=ATXN10 PE=4 SV=1	tr|M3WIY7|M3WIY7_FELCA	49 kDa	0	3	0	0
ARP3 actin related protein 3 homolog OS=Felis catus GN=ACTR3 PE=3 SV=1	tr|M3WJ03|M3WJ03_FELCA	47 kDa	0	29	7	0
Rho GTPase activating protein 1 OS=Felis catus GN=ARHGAP1 PE=4 SV=1	tr|M3WJ76|M3WJ76_FELCA	50 kDa	0	18	3	0
Pre-mRNA processing factor 19 OS=Felis catus GN=PRPF19 PE=4 SV=1	tr|M3WJ97|M3WJ97_FELCA	55 kDa	0	2	12	0
Uncharacterized protein OS=Felis catus GN=NT5C2 PE=4 SV=1	tr|M3WJC3|M3WJC3_FELCA	58 kDa	0	0	4	0
Chaperonin containing TCP1 subunit 7 OS=Felis catus GN=CCT7 PE=3 SV=1	tr|M3WJC5|M3WJC5_FELCA	59 kDa	0	14	32	19
Signal transducer and activator of transcription OS=Felis catus GN=STAT1 PE=3 SV=1	tr|M3WJD7|M3WJD7_FELCA	87 kDa	0	0	0	2
Beta-galactosidase OS=Felis catus GN=GLB1L2 PE=3 SV=1	tr|M3WJE3|M3WJE3_FELCA	72 kDa	0	0	14	0
Moesin OS=Felis catus GN=MSN PE=4 SV=1	tr|M3WJI8|M3WJI8_FELCA	68 kDa	0	15	23	14
Mucin 15, cell surface associated OS=Felis catus GN=MUC15 PE=4 SV=1	tr|M3WJI9|M3WJI9_FELCA	36 kDa	0	0	2	23
Sec23 homolog B, coat complex II component OS=Felis catus GN=SEC23B PE=4 SV=1	tr|M3WJJ8|M3WJJ8_FELCA	86 kDa	0	0	0	6
Ornithine aminotransferase OS=Felis catus GN=OAT PE=3 SV=1	tr|M3WJK8|M3WJK8_FELCA	48 kDa	0	4	0	0
Kininogen 1 OS=Felis catus GN=KNG1 PE=4 SV=1	tr|M3WJN1|M3WJN1_FELCA	73 kDa	0	0	2	0
Eukaryotic translation initiation factor 4A2 OS=Felis catus GN=EIF4A2 PE=3 SV=1	tr|M3WJN3|M3WJN3_FELCA	46 kDa	0	40	0	0
Adiponectin, C1Q and collagen domain containing OS=Felis catus GN=ADIPOQ PE=4 SV=1	tr|M3WJN6|M3WJN6_FELCA	27 kDa	0	0	2	0
ST6 beta-galactoside alpha-2,6-sialyltransferase 1 OS=Felis catus GN=ST6GAL1 PE=3 SV=1	tr|M3WJN7|M3WJN7_FELCA	46 kDa	0	0	2	0
Neural cell adhesion molecule 1 OS=Felis catus GN=NCAM1 PE=4 SV=1	tr|M3WJP0|M3WJP0_FELCA	91 kDa	0	0	0	18
Myosin IB OS=Felis catus GN=MYO1B PE=3 SV=1	tr|M3WJQ2|M3WJQ2_FELCA	131 kDa	0	0	0	6
Uncharacterized protein OS=Felis catus GN=MCCC2 PE=4 SV=1	tr|M3WJQ5|M3WJQ5_FELCA	61 kDa	0	0	2	0
ATP-dependent 6-phosphofructokinase OS=Felis catus GN=PFKM PE=3 SV=1	tr|M3WJW8|M3WJW8_FELCA	93 kDa	0	0	0	3
Cadherin 1 OS=Felis catus GN=CDH1 PE=4 SV=1	tr|M3WJX8|M3WJX8_FELCA	98 kDa	0	0	0	2
Transmembrane protein 119 OS=Felis catus GN=TMEM119 PE=4 SV=1	tr|M3WJZ5|M3WJZ5_FELCA	24 kDa	0	0	3	0
Septin 8 OS=Felis catus GN=SEPT8 PE=3 SV=1	tr|M3WJZ6|M3WJZ6_FELCA	56 kDa	0	0	6	0
Ectonucleotide pyrophosphatase/phosphodiesterase 3 OS=Felis catus GN=ENPP3 PE=4 SV=1	tr|M3WK44|M3WK44_FELCA	100 kDa	0	0	0	56
Uncharacterized protein OS=Felis catus PE=3 SV=1	tr|M3WK49|M3WK49_FELCA	42 kDa	0	7	0	0
Major vault protein OS=Felis catus GN=MVP PE=4 SV=1	tr|M3WK62|M3WK62_FELCA	99 kDa	0	0	0	91
Mitogen-activated protein kinase OS=Felis catus GN=MAPK3 PE=4 SV=1	tr|M3WK78|M3WK78_FELCA	43 kDa	0	10	0	0
Uncharacterized protein OS=Felis catus GN=LAMP1 PE=3 SV=1	tr|M3WKD0|M3WKD0_FELCA	45 kDa	0	0	0	4
Aspartyl-tRNA synthetase OS=Felis catus GN=DARS PE=3 SV=1	tr|M3WKG0|M3WKG0_FELCA	53 kDa	0	0	3	3
Carboxylic ester hydrolase OS=Felis catus GN=CES1 PE=3 SV=1	tr|M3WKH4|M3WKH4_FELCA	62 kDa	0	0	5	0
ATPase H+ transporting V1 subunit H OS=Felis catus GN=ATP6V1H PE=4 SV=1	tr|M3WKN2|M3WKN2_FELCA	56 kDa	0	0	9	0
Epoxide hydrolase 2 OS=Felis catus GN=EPHX2 PE=4 SV=1	tr|M3WKP1|M3WKP1_FELCA	62 kDa	0	0	12	0
Clusterin OS=Felis catus GN=CLU PE=3 SV=1	tr|M3WKP2|M3WKP2_FELCA	52 kDa	0	0	16	10
Lactotransferrin OS=Felis catus GN=LTF PE=3 SV=1	tr|M3WKU0|M3WKU0_FELCA	78 kDa	0	0	11	0
6-phosphogluconate dehydrogenase, decarboxylating OS=Felis catus GN=PGD PE=3 SV=1	tr|M3WKZ2|M3WKZ2_FELCA	53 kDa	0	34	2	0
Tubulin beta chain OS=Felis catus GN=TUBB2A PE=3 SV=1	tr|M3WL15|M3WL15_FELCA	50 kDa	0	0	0	52
Tubulin beta chain OS=Felis catus GN=TUBB2A PE=3 SV=1	tr|M3WL16|M3WL16_FELCA	50 kDa	0	0	60	52
LIM and cysteine rich domains 1 OS=Felis catus GN=LMCD1 PE=4 SV=1	tr|M3WL80|M3WL80_FELCA	36 kDa	0	2	0	0
IlvB acetolactate synthase like OS=Felis catus GN=ILVBL PE=3 SV=1	tr|M3WL98|M3WL98_FELCA	68 kDa	0	0	7	0
Uncharacterized protein OS=Felis catus GN=HNRNPUL2 PE=4 SV=1	tr|M3WLA8|M3WLA8_FELCA	78 kDa	0	0	0	11
Solute carrier family 3 member 2 OS=Felis catus GN=SLC3A2 PE=4 SV=1	tr|M3WLC0|M3WLC0_FELCA	58 kDa	0	0	0	3
ATP-dependent (S)-NAD(P)H-hydrate dehydratase OS=Felis catus GN=CARKD PE=3 SV=1	tr|M3WLC4|M3WLC4_FELCA	34 kDa	0	7	0	0
Uncharacterized protein OS=Felis catus PE=4 SV=1	tr|M3WLF2|M3WLF2_FELCA	17 kDa	0	4	0	0
Serine/threonine kinase 24 OS=Felis catus GN=STK24 PE=4 SV=1	tr|M3WLG2|M3WLG2_FELCA	48 kDa	0	0	2	0
Solute carrier family 15 member 1 OS=Felis catus GN=SLC15A1 PE=3 SV=1	tr|M3WLG5|M3WLG5_FELCA	79 kDa	0	0	0	2
Complement C6 OS=Felis catus GN=C6 PE=4 SV=1	tr|M3WLH3|M3WLH3_FELCA	105 kDa	0	0	0	7
Proliferation-associated 2G4 OS=Felis catus GN=PA2G4 PE=4 SV=1	tr|M3WLH5|M3WLH5_FELCA	44 kDa	0	9	0	0
Extended synaptotagmin 1 OS=Felis catus GN=ESYT1 PE=4 SV=1	tr|M3WLH6|M3WLH6_FELCA	123 kDa	0	0	0	16
Myosin light chain 6 OS=Felis catus GN=MYL6 PE=4 SV=1	tr|M3WLI0|M3WLI0_FELCA	17 kDa	0	0	0	2
NDRG family member 2 OS=Felis catus GN=NDRG2 PE=4 SV=1	tr|M3WLJ2|M3WLJ2_FELCA	43 kDa	0	10	0	0
BRO1 domain and CAAX motif containing OS=Felis catus GN=BROX PE=4 SV=1	tr|M3WLK2|M3WLK2_FELCA	46 kDa	0	6	0	0
Serpin family C member 1 OS=Felis catus GN=SERPINC1 PE=3 SV=1	tr|M3WLL8|M3WLL8_FELCA	52 kDa	0	3	29	2
Uncharacterized protein OS=Felis catus GN=HADHB PE=3 SV=1	tr|M3WLM4|M3WLM4_FELCA	51 kDa	0	19	0	0
Proteasome 26S subunit, non-ATPase 3 OS=Felis catus GN=PSMD3 PE=4 SV=1	tr|M3WLR0|M3WLR0_FELCA	61 kDa	0	2	17	18
Farnesyl-diphosphate farnesyltransferase 1 OS=Felis catus GN=FDFT1 PE=4 SV=1	tr|M3WLT9|M3WLT9_FELCA	44 kDa	0	5	0	0
Prominin 1 OS=Felis catus GN=PROM1 PE=4 SV=1	tr|M3WLW5|M3WLW5_FELCA	86 kDa	0	0	0	26
Integrin beta OS=Felis catus GN=ITGB5 PE=3 SV=1	tr|M3WLX3|M3WLX3_FELCA	90 kDa	0	0	0	8
Myosin IF OS=Felis catus GN=MYO1F PE=3 SV=1	tr|M3WM71|M3WM71_FELCA	125 kDa	0	0	0	3
Dynein cytoplasmic 1 light intermediate chain 2 OS=Felis catus GN=DYNC1LI2 PE=4 SV=1	tr|M3WM88|M3WM88_FELCA (+1)	54 kDa	0	15	0	0
Polyadenylate-binding protein OS=Felis catus GN=PABPC4 PE=3 SV=1	tr|M3WM89|M3WM89_FELCA	72 kDa	0	9	0	0
Uncharacterized protein OS=Felis catus GN=SARS PE=4 SV=1	tr|M3WM92|M3WM92_FELCA (+1)	59 kDa	0	0	3	0
Mannose-6-phosphate receptor, cation dependent OS=Felis catus GN=M6PR PE=4 SV=1	tr|M3WMA7|M3WMA7_FELCA	31 kDa	0	17	3	0
Alpha-2-macroglobulin OS=Felis catus GN=A2M PE=4 SV=1	tr|M3WMA9|M3WMA9_FELCA	164 kDa	0	0	4	36
Mannosyl (alpha-1,3-)-glycoprotein beta-1,2-N-acetylglucosaminyltransferase OS=Felis catus GN=MGAT1 PE=4 SV=1	tr|M3WMF0|M3WMF0_FELCA	52 kDa	0	5	2	0
Galactosidase alpha OS=Felis catus GN=GLA PE=3 SV=1	tr|M3WMI7|M3WMI7_FELCA	48 kDa	0	5	0	0
Serine hydroxymethyltransferase OS=Felis catus GN=SHMT1 PE=3 SV=1	tr|M3WMK4|M3WMK4_FELCA	53 kDa	0	0	0	5
Trans-golgi network protein 2 OS=Felis catus GN=TGOLN2 PE=4 SV=1	tr|M3WMM3|M3WMM3_FELCA	47 kDa	0	0	0	17
Receptor protein-tyrosine kinase OS=Felis catus GN=EGFR PE=3 SV=1	tr|M3WMN1|M3WMN1_FELCA	134 kDa	0	0	0	2
N-acylsphingosine amidohydrolase 1 OS=Felis catus GN=ASAH1 PE=4 SV=1	tr|M3WMR0|M3WMR0_FELCA	45 kDa	0	2	0	0
ER lipid raft associated 2 OS=Felis catus GN=ERLIN2 PE=4 SV=1	tr|M3WMT2|M3WMT2_FELCA	37 kDa	0	15	0	0
Adhesion G protein-coupled receptor A2 OS=Felis catus GN=ADGRA2 PE=3 SV=1	tr|M3WMT5|M3WMT5_FELCA	117 kDa	0	0	0	3
Adenosine kinase OS=Felis catus GN=ADK PE=4 SV=1	tr|M3WMV3|M3WMV3_FELCA	41 kDa	0	25	0	0
Endoplasmic reticulum protein 44 OS=Felis catus GN=ERP44 PE=4 SV=1	tr|M3WMZ2|M3WMZ2_FELCA	47 kDa	0	31	10	5
Uncharacterized protein OS=Felis catus PE=3 SV=1	tr|M3WMZ6|M3WMZ6_FELCA	49 kDa	0	0	4	0
Fibrinogen gamma chain OS=Felis catus GN=FGG PE=4 SV=1	tr|M3WN28|M3WN28_FELCA	49 kDa	0	0	0	4
Glycosyltransferase 8 domain containing 1 OS=Felis catus GN=GLT8D1 PE=4 SV=1	tr|M3WN57|M3WN57_FELCA	42 kDa	0	11	6	0
Ubiquitin specific peptidase 14 OS=Felis catus GN=USP14 PE=3 SV=1	tr|M3WN78|M3WN78_FELCA	56 kDa	0	0	6	0
Collectin subfamily member 12 OS=Felis catus GN=COLEC12 PE=4 SV=1	tr|M3WN82|M3WN82_FELCA	73 kDa	0	0	0	4
NADH:ubiquinone oxidoreductase core subunit S2 OS=Felis catus GN=NDUFS2 PE=3 SV=1	tr|M3WN83|M3WN83_FELCA	48 kDa	0	2	0	0
Uncharacterized protein OS=Felis catus GN=CAMK2D PE=3 SV=1	tr|M3WNF0|M3WNF0_FELCA	56 kDa	0	2	0	2
Paraoxonase 1 OS=Felis catus GN=PON1 PE=4 SV=1	tr|M3WNF1|M3WNF1_FELCA	40 kDa	0	10	0	0
Uncharacterized protein OS=Felis catus GN=ISG15 PE=4 SV=1	tr|M3WNM9|M3WNM9_FELCA	17 kDa	0	0	0	2
Renin binding protein OS=Felis catus GN=RENBP PE=4 SV=1	tr|M3WNP8|M3WNP8_FELCA	50 kDa	0	2	0	0
UDP-glucose pyrophosphorylase 2 OS=Felis catus GN=UGP2 PE=4 SV=1	tr|M3WNV6|M3WNV6_FELCA	59 kDa	0	9	26	0
Adhesion G protein-coupled receptor G2 OS=Felis catus GN=ADGRG2 PE=3 SV=1	tr|M3WP79|M3WP79_FELCA	106 kDa	0	0	0	12
Calmegin OS=Felis catus GN=CLGN PE=3 SV=1	tr|M3WPF0|M3WPF0_FELCA	70 kDa	0	0	0	3
Transportin 3 OS=Felis catus GN=TNPO3 PE=4 SV=1	tr|M3WPH3|M3WPH3_FELCA	104 kDa	0	0	0	2
Exocyst complex component 1 OS=Felis catus GN=EXOC1 PE=4 SV=1	tr|M3WPI1|M3WPI1_FELCA	102 kDa	0	0	0	4
DExH-box helicase 9 OS=Felis catus GN=DHX9 PE=4 SV=1	tr|M3WPI7|M3WPI7_FELCA	141 kDa	0	0	0	8
NCK associated protein 1 OS=Felis catus GN=NCKAP1 PE=4 SV=1	tr|M3WPK0|M3WPK0_FELCA	126 kDa	0	0	0	40
Sorting nexin OS=Felis catus GN=SNX6 PE=3 SV=1	tr|M3WPK1|M3WPK1_FELCA	46 kDa	0	5	0	0
Integrin beta OS=Felis catus GN=ITGB1 PE=3 SV=1	tr|M3WPL0|M3WPL0_FELCA	88 kDa	0	0	0	33
AP-3 complex subunit beta OS=Felis catus GN=AP3B2 PE=3 SV=1	tr|M3WPN1|M3WPN1_FELCA	113 kDa	0	0	0	7
Prolyl 4-hydroxylase subunit alpha 1 OS=Felis catus GN=P4HA1 PE=4 SV=1	tr|M3WPP5|M3WPP5_FELCA	61 kDa	0	0	6	0
Sec23 homolog A, coat complex II component OS=Felis catus GN=SEC23A PE=4 SV=1	tr|M3WPR4|M3WPR4_FELCA	86 kDa	0	0	3	0
Copine 1 OS=Felis catus GN=CPNE1 PE=4 SV=1	tr|M3WPS9|M3WPS9_FELCA	59 kDa	0	0	13	4
Cysteine rich with EGF like domains 2 OS=Felis catus GN=CRELD2 PE=4 SV=1	tr|M3WQ40|M3WQ40_FELCA	39 kDa	0	0	2	0
Syntaxin binding protein 3 OS=Felis catus GN=STXBP3 PE=3 SV=1	tr|M3WQB8|M3WQB8_FELCA	68 kDa	0	0	4	0
Uncharacterized protein OS=Felis catus PE=4 SV=1	tr|M3WQG8|M3WQG8_FELCA	27 kDa	0	0	0	4
Parvin alpha OS=Felis catus GN=PARVA PE=4 SV=1	tr|M3WQH4|M3WQH4_FELCA	39 kDa	0	4	0	0
Neutral cholesterol ester hydrolase 1 OS=Felis catus GN=NCEH1 PE=4 SV=1	tr|M3WQJ7|M3WQJ7_FELCA	48 kDa	0	4	0	0
Uncharacterized protein OS=Felis catus PE=4 SV=1	tr|M3WQM7|M3WQM7_FELCA	12 kDa	0	5	0	2
Carboxypeptidase Q OS=Felis catus GN=CPQ PE=4 SV=1	tr|M3WQN1|M3WQN1_FELCA	52 kDa	0	0	2	0
Aldose 1-epimerase OS=Felis catus GN=GALM PE=3 SV=1	tr|M3WQR6|M3WQR6_FELCA	38 kDa	0	6	0	0
Uncharacterized protein OS=Felis catus PE=4 SV=1	tr|M3WQX9|M3WQX9_FELCA	10 kDa	0	0	0	7
Folate receptor 1 OS=Felis catus GN=FOLR1 PE=4 SV=1	tr|M3WR11|M3WR11_FELCA	29 kDa	0	7	3	0
Uncharacterized protein OS=Felis catus PE=4 SV=1	tr|M3WR28|M3WR28_FELCA	53 kDa	0	2	0	0
Uncharacterized protein OS=Felis catus PE=4 SV=1	tr|M3WR32|M3WR32_FELCA	13 kDa	0	0	9	0
Uncharacterized protein OS=Felis catus GN=SYPL1 PE=4 SV=1	tr|M3WRE2|M3WRE2_FELCA	29 kDa	0	7	4	0
Pyruvate kinase OS=Felis catus GN=PKM PE=3 SV=1	tr|M3WRG5|M3WRG5_FELCA	58 kDa	0	0	51	0
Uncharacterized protein OS=Felis catus PE=4 SV=1	tr|M3WRH4|M3WRH4_FELCA	37 kDa	0	6	0	0
Arginyl-tRNA synthetase OS=Felis catus GN=RARS PE=3 SV=1	tr|M3WRM0|M3WRM0_FELCA	76 kDa	0	0	4	0
Glucosaminyl (N-acetyl) transferase 4, core 2 OS=Felis catus GN=GCNT4 PE=4 SV=1	tr|M3WRM6|M3WRM6_FELCA	50 kDa	0	0	13	0
Protein kinase cAMP-dependent type II regulatory subunit alpha OS=Felis catus GN=PRKAR2A PE=4 SV=1	tr|M3WRP3|M3WRP3_FELCA	45 kDa	0	0	18	0
Protein O-fucosyltransferase 1 OS=Felis catus GN=POFUT1 PE=4 SV=1	tr|M3WRS8|M3WRS8_FELCA	44 kDa	0	3	0	0
Chitinase domain containing 1 OS=Felis catus GN=CHID1 PE=4 SV=1	tr|M3WS14|M3WS14_FELCA	47 kDa	0	9	0	0
HYDIN, axonemal central pair apparatus protein OS=Felis catus GN=HYDIN PE=4 SV=1	tr|M3WSD0|M3WSD0_FELCA	524 kDa	0	0	2	0
DnaJ heat shock protein family (Hsp40) member C3 OS=Felis catus GN=DNAJC3 PE=4 SV=1	tr|M3WSH1|M3WSH1_FELCA	55 kDa	0	0	30	0
Arginine demethylase and lysine hydroxylase OS=Felis catus GN=JMJD6 PE=4 SV=1	tr|M3WSH9|M3WSH9_FELCA	48 kDa	0	6	0	0
Prothrombin OS=Felis catus GN=F2 PE=3 SV=1	tr|M3WSI8|M3WSI8_FELCA	70 kDa	0	0	0	2
UDP-glucuronosyltransferase OS=Felis catus PE=3 SV=1	tr|M3WSM3|M3WSM3_FELCA	42 kDa	0	2	0	0
BUB3, mitotic checkpoint protein OS=Felis catus GN=BUB3 PE=4 SV=1	tr|M3WST7|M3WST7_FELCA	37 kDa	0	2	0	0
Calumenin OS=Felis catus GN=CALU PE=4 SV=1	tr|M3WSV1|M3WSV1_FELCA	29 kDa	0	10	0	0
Uncharacterized protein OS=Felis catus PE=4 SV=1	tr|M3WSV5|M3WSV5_FELCA	61 kDa	0	2	0	17
Uncharacterized protein OS=Felis catus PE=4 SV=1	tr|M3WSY1|M3WSY1_FELCA	15 kDa	0	0	0	4
Reticulocalbin 2 OS=Felis catus GN=RCN2 PE=4 SV=1	tr|M3WSZ0|M3WSZ0_FELCA	27 kDa	0	10	0	0
Actin-related protein 10 homolog OS=Felis catus GN=ACTR10 PE=3 SV=1	tr|M3WSZ8|M3WSZ8_FELCA	46 kDa	0	16	0	0
Lectin, mannose binding 1 OS=Felis catus GN=LMAN1 PE=4 SV=1	tr|M3WT41|M3WT41_FELCA	58 kDa	0	2	24	35
Glycoprotein-N-acetylgalactosamine 3-beta-galactosyltransferase 1 OS=Felis catus GN=C1GALT1 PE=3 SV=1	tr|M3WT46|M3WT46_FELCA	42 kDa	0	3	0	0
Aldehyde dehydrogenase OS=Felis catus GN=ALDH3A2 PE=3 SV=1	tr|M3WTG1|M3WTG1_FELCA	57 kDa	0	6	23	0
Proteasome 26S subunit, non-ATPase 7 OS=Felis catus GN=PSMD7 PE=4 SV=1	tr|M3WTN9|M3WTN9_FELCA	37 kDa	0	12	0	0
Zinc finger protein 132 OS=Felis catus GN=ZNF132 PE=4 SV=1	tr|M3WTQ8|M3WTQ8_FELCA	84 kDa	0	2	0	0
Beta-1,4-galactosyltransferase 1 OS=Felis catus GN=B4GALT1 PE=4 SV=1	tr|M3WTX2|M3WTX2_FELCA	42 kDa	0	0	8	0
Uncharacterized protein OS=Felis catus PE=4 SV=1	tr|M3WTZ6|M3WTZ6_FELCA	23 kDa	0	0	0	6
Kinesin-like protein OS=Felis catus GN=KIF5B PE=3 SV=1	tr|M3WU61|M3WU61_FELCA	110 kDa	0	0	0	11
GDP-mannose pyrophosphorylase A OS=Felis catus GN=GMPPA PE=4 SV=1	tr|M3WU81|M3WU81_FELCA	46 kDa	0	17	0	0
Atlastin GTPase 3 OS=Felis catus GN=ATL3 PE=4 SV=1	tr|M3WUB4|M3WUB4_FELCA	60 kDa	0	0	15	0
Synaptotagmin binding cytoplasmic RNA interacting protein OS=Felis catus GN=SYNCRIP PE=4 SV=1	tr|M3WUF3|M3WUF3_FELCA (+1)	70 kDa	0	3	0	0
Membrane metalloendopeptidase OS=Felis catus GN=MME PE=4 SV=1	tr|M3WUH9|M3WUH9_FELCA	86 kDa	0	0	0	22
Aldehyde dehydrogenase OS=Felis catus GN=ALDH3B1 PE=3 SV=1	tr|M3WUQ7|M3WUQ7_FELCA	52 kDa	0	0	6	0
Aldehyde dehydrogenase 1 family member A2 OS=Felis catus GN=ALDH1A2 PE=3 SV=1	tr|M3WUR3|M3WUR3_FELCA	44 kDa	0	0	11	0
Crystallin zeta like 1 OS=Felis catus GN=CRYZL1 PE=4 SV=1	tr|M3WUS5|M3WUS5_FELCA	39 kDa	0	4	0	0
Na(+)/H(+) exchange regulatory cofactor NHE-RF OS=Felis catus GN=SLC9A3R1 PE=4 SV=1	tr|M3WUV9|M3WUV9_FELCA	39 kDa	0	5	6	0
Transmembrane 9 superfamily member OS=Felis catus GN=TM9SF3 PE=3 SV=1	tr|M3WVF3|M3WVF3_FELCA	64 kDa	0	0	0	4
Phosphatidylinositol glycan anchor biosynthesis class T OS=Felis catus GN=PIGT PE=4 SV=1	tr|M3WVG3|M3WVG3_FELCA	65 kDa	0	0	0	7
Phosphoglucomutase 1 OS=Felis catus GN=PGM1 PE=3 SV=1	tr|M3WVK0|M3WVK0_FELCA	55 kDa	0	0	18	0
Collagen type I alpha 2 chain OS=Felis catus GN=COL1A2 PE=4 SV=1	tr|M3WVN3|M3WVN3_FELCA	130 kDa	0	0	0	10
Phenylalanyl-tRNA synthetase alpha subunit OS=Felis catus GN=FARSA PE=4 SV=1	tr|M3WVQ2|M3WVQ2_FELCA	57 kDa	0	0	18	0
Uncharacterized protein OS=Felis catus PE=4 SV=1	tr|M3WVR8|M3WVR8_FELCA	42 kDa	0	0	0	6
ER lipid raft associated 1 OS=Felis catus GN=ERLIN1 PE=4 SV=1	tr|M3WVS2|M3WVS2_FELCA	39 kDa	0	8	0	0
Uncharacterized protein OS=Felis catus PE=4 SV=1	tr|M3WVS6|M3WVS6_FELCA	35 kDa	0	0	0	6
Uncharacterized protein OS=Felis catus GN=LOC102899273 PE=4 SV=1	tr|M3WVX0|M3WVX0_FELCA	43 kDa	0	2	7	3
Nucleolin OS=Felis catus GN=NCL PE=4 SV=1	tr|M3WVY3|M3WVY3_FELCA	78 kDa	0	21	17	15
Uncharacterized protein OS=Felis catus PE=4 SV=1	tr|M3WW06|M3WW06_FELCA	10 kDa	0	2	0	0
Sterol carrier protein 2 OS=Felis catus GN=SCP2 PE=3 SV=1	tr|M3WW41|M3WW41_FELCA	45 kDa	0	3	0	0
Potassium channel tetramerization domain containing 12 OS=Felis catus GN=KCTD12 PE=4 SV=1	tr|M3WWC3|M3WWC3_FELCA	33 kDa	0	4	0	0
DnaJ homolog subfamily C member 10 OS=Felis catus GN=DNAJC10 PE=4 SV=1	tr|M3WWG7|M3WWG7_FELCA	91 kDa	0	0	4	19
Protein kinase cAMP-activated catalytic subunit alpha OS=Felis catus GN=PRKACA PE=3 SV=1	tr|M3WWL5|M3WWL5_FELCA	40 kDa	0	31	0	0
Zinc finger Ran-binding domain-containing protein 2 OS=Felis catus GN=ZRANB2 PE=3 SV=1	tr|M3WWN3|M3WWN3_FELCA	37 kDa	0	2	0	0
Asporin OS=Felis catus GN=ASPN PE=4 SV=1	tr|M3WWN6|M3WWN6_FELCA	42 kDa	0	8	0	0
Uncharacterized protein OS=Felis catus PE=4 SV=1	tr|M3WWU4|M3WWU4_FELCA	27 kDa	0	0	0	4
G protein subunit alpha 14 OS=Felis catus GN=GNA14 PE=4 SV=1	tr|M3WWZ2|M3WWZ2_FELCA	42 kDa	0	12	0	0
Uncharacterized protein OS=Felis catus PE=3 SV=1	tr|M3WX06|M3WX06_FELCA	41 kDa	0	13	0	0
Sodium/potassium-transporting ATPase subunit beta OS=Felis catus GN=ATP1B3 PE=3 SV=1	tr|M3WX58|M3WX58_FELCA	27 kDa	0	6	0	0
Atlastin GTPase 1 OS=Felis catus GN=ATL1 PE=4 SV=1	tr|M3WXA3|M3WXA3_FELCA	61 kDa	0	0	2	0
Peptidase inhibitor 16 OS=Felis catus GN=PI16 PE=3 SV=1	tr|M3WXF2|M3WXF2_FELCA	49 kDa	0	0	0	12
Uncharacterized protein OS=Felis catus PE=4 SV=1	tr|M3WXH9|M3WXH9_FELCA (+1)	42 kDa	0	2	0	0
Karyopherin subunit beta 1 OS=Felis catus GN=KPNB1 PE=4 SV=1	tr|M3WXK0|M3WXK0_FELCA	97 kDa	0	0	0	9
SEC62 homolog, preprotein translocation factor OS=Felis catus GN=SEC62 PE=4 SV=1	tr|M3WXK6|M3WXK6_FELCA	46 kDa	0	0	5	0
Alpha-(1,6)-fucosyltransferase OS=Felis catus GN=FUT8 PE=3 SV=1	tr|M3WXP3|M3WXP3_FELCA	67 kDa	0	0	7	0
Uncharacterized protein OS=Felis catus PE=4 SV=1	tr|M3WXQ0|M3WXQ0_FELCA	22 kDa	0	0	0	7
Importin 5 OS=Felis catus GN=IPO5 PE=4 SV=1	tr|M3WXS9|M3WXS9_FELCA	124 kDa	0	0	0	21
Uncharacterized protein OS=Felis catus GN=HSPD1 PE=3 SV=1	tr|M3WXZ4|M3WXZ4_FELCA	61 kDa	0	0	10	0
Acetyl-CoA acyltransferase 2 OS=Felis catus GN=ACAA2 PE=3 SV=1	tr|M3WYD1|M3WYD1_FELCA	42 kDa	0	8	0	0
Uncharacterized protein OS=Felis catus GN=FLAI-K PE=3 SV=1	tr|M3WYM6|M3WYM6_FELCA	41 kDa	0	13	0	0
Trafficking protein particle complex 12 OS=Felis catus GN=TRAPPC12 PE=4 SV=1	tr|M3WYP7|M3WYP7_FELCA	85 kDa	0	3	0	0
N-acetylated alpha-linked acidic dipeptidase 2 OS=Felis catus GN=NAALAD2 PE=4 SV=1	tr|M3WYX6|M3WYX6_FELCA	83 kDa	0	0	0	9
Clathrin heavy chain OS=Felis catus GN=CLTC PE=3 SV=1	tr|M3WZ57|M3WZ57_FELCA (+1)	187 kDa	0	0	0	29
Uncharacterized protein OS=Felis catus GN=ACY1 PE=4 SV=1	tr|M3WZA0|M3WZA0_FELCA	45 kDa	0	11	0	0
ATP synthase subunit alpha OS=Felis catus GN=ATP5A1 PE=3 SV=1	tr|M3WZB0|M3WZB0_FELCA	60 kDa	0	10	13	0
Aminoadipate-semialdehyde synthase OS=Felis catus GN=AASS PE=4 SV=1	tr|M3WZB2|M3WZB2_FELCA	103 kDa	0	0	0	5
Argininosuccinate synthase 1 OS=Felis catus GN=ASS1 PE=3 SV=1	tr|M3WZN9|M3WZN9_FELCA	46 kDa	0	34	0	0
Glycosyltransferase 8 domain containing 2 OS=Felis catus GN=GLT8D2 PE=4 SV=1	tr|M3X085|M3X085_FELCA	40 kDa	0	5	0	0
Myotubularin related protein 2 OS=Felis catus GN=MTMR2 PE=3 SV=1	tr|M3X099|M3X099_FELCA	66 kDa	0	0	2	0
Phenylalanyl-tRNA synthetase beta subunit OS=Felis catus GN=FARSB PE=4 SV=1	tr|M3X0C2|M3X0C2_FELCA	66 kDa	0	0	2	0
DEAD-box helicase 17 OS=Felis catus GN=DDX17 PE=3 SV=1	tr|M3X0G5|M3X0G5_FELCA	67 kDa	0	2	0	0
Heterogeneous nuclear ribonucleoprotein D OS=Felis catus GN=HNRNPD PE=4 SV=1	tr|M3X0J4|M3X0J4_FELCA	40 kDa	0	4	0	0
Isocitrate dehydrogenase [NADP] OS=Felis catus GN=IDH2 PE=3 SV=1	tr|M3X0N0|M3X0N0_FELCA	46 kDa	0	24	0	0
G protein subunit alpha q OS=Felis catus GN=GNAQ PE=4 SV=1	tr|M3X0R4|M3X0R4_FELCA	35 kDa	0	10	0	0
Glypican 1 OS=Felis catus GN=GPC1 PE=3 SV=1	tr|M3X0U1|M3X0U1_FELCA	55 kDa	0	0	0	5
Decorin OS=Felis catus GN=DCN PE=4 SV=1	tr|M3X0W2|M3X0W2_FELCA	40 kDa	0	2	8	25
Phosphatidylinositol-5-phosphate 4-kinase type 2 gamma OS=Felis catus GN=PIP4K2C PE=4 SV=1	tr|M3X147|M3X147_FELCA	47 kDa	0	2	0	0
Phosphoglycerate kinase OS=Felis catus GN=PGK2 PE=3 SV=1	tr|M3X166|M3X166_FELCA	45 kDa	0	15	0	0
Ectonucleotide pyrophosphatase/phosphodiesterase 5 (putative) OS=Felis catus GN=ENPP5 PE=4 SV=1	tr|M3X1B4|M3X1B4_FELCA	55 kDa	0	0	0	3
Adaptor related protein complex 1 gamma 1 subunit OS=Felis catus GN=AP1G1 PE=4 SV=1	tr|M3X1F8|M3X1F8_FELCA	94 kDa	0	0	0	9
RAD23 homolog A, nucleotide excision repair protein OS=Felis catus GN=RAD23A PE=4 SV=1	tr|M3X1H1|M3X1H1_FELCA	40 kDa	0	0	4	0
Uncharacterized protein OS=Felis catus PE=4 SV=1	tr|M3X1N9|M3X1N9_FELCA	20 kDa	0	0	0	7
Myosin VI OS=Felis catus GN=MYO6 PE=4 SV=1	tr|M3X1R1|M3X1R1_FELCA	149 kDa	0	0	0	23
EH domain containing 1 OS=Felis catus GN=EHD1 PE=3 SV=1	tr|M3X1U0|M3X1U0_FELCA	61 kDa	0	13	27	0
Mitogen-activated protein kinase kinase 1 OS=Felis catus GN=MAP2K1 PE=3 SV=1	tr|M3X1X5|M3X1X5_FELCA	44 kDa	0	6	0	0
Uncharacterized protein OS=Felis catus PE=4 SV=1	tr|M3X1Z9|M3X1Z9_FELCA	13 kDa	0	0	0	7
Cytochrome P450 family 20 subfamily A member 1 OS=Felis catus GN=CYP20A1 PE=4 SV=1	tr|M3X215|M3X215_FELCA	53 kDa	0	25	0	0
Uncharacterized protein OS=Felis catus GN=LOC101087599 PE=3 SV=1	tr|M3X260|M3X260_FELCA	78 kDa	0	0	6	0
Protein phosphatase, Mg2+/Mn2+ dependent 1A OS=Felis catus GN=PPM1A PE=3 SV=1	tr|M3X268|M3X268_FELCA	43 kDa	0	5	0	0
Uncharacterized protein OS=Felis catus PE=4 SV=1	tr|M3X2U0|M3X2U0_FELCA	22 kDa	0	0	0	5
2-phosphoxylose phosphatase 1 OS=Felis catus GN=PXYLP1 PE=3 SV=1	tr|M3X2X4|M3X2X4_FELCA	56 kDa	0	0	25	0
LanC like 1 OS=Felis catus GN=LANCL1 PE=4 SV=1	tr|M3X2Y7|M3X2Y7_FELCA	45 kDa	0	2	0	0
Immunoglobulin superfamily containing leucine rich repeat OS=Felis catus GN=ISLR PE=4 SV=1	tr|M3X315|M3X315_FELCA	46 kDa	0	0	9	0
Proteasome 26S subunit, non-ATPase 12 OS=Felis catus GN=PSMD12 PE=4 SV=1	tr|M3X366|M3X366_FELCA	53 kDa	0	15	12	0
Serine/threonine-protein phosphatase OS=Felis catus GN=PPP2CA PE=3 SV=1	tr|M3X381|M3X381_FELCA	36 kDa	0	3	0	0
Uncharacterized protein OS=Felis catus GN=PLG PE=3 SV=1	tr|M3X3T9|M3X3T9_FELCA	92 kDa	0	0	0	44
HECT and RLD domain containing E3 ubiquitin protein ligase 4 OS=Felis catus GN=HERC4 PE=4 SV=1	tr|M3X440|M3X440_FELCA	118 kDa	0	0	0	7
Uncharacterized protein OS=Felis catus PE=4 SV=1	tr|M3X452|M3X452_FELCA	14 kDa	0	0	0	3
Contactin 1 OS=Felis catus GN=CNTN1 PE=4 SV=1	tr|M3X487|M3X487_FELCA (+1)	113 kDa	0	0	0	2
KIAA2013 OS=Felis catus GN=KIAA2013 PE=4 SV=1	tr|M3X4E2|M3X4E2_FELCA	59 kDa	0	0	5	0
Uncharacterized protein OS=Felis catus PE=4 SV=1	tr|M3X4E4|M3X4E4_FELCA	14 kDa	0	0	0	2
Eukaryotic translation initiation factor 3 subunit F OS=Felis catus GN=EIF3F PE=3 SV=1	tr|M3X4G2|M3X4G2_FELCA	39 kDa	0	0	21	0
AHNAK nucleoprotein OS=Felis catus GN=AHNAK PE=4 SV=1	tr|M3X4Q9|M3X4Q9_FELCA	613 kDa	0	0	0	8
Uncharacterized protein OS=Felis catus PE=4 SV=1	tr|M3X4R5|M3X4R5_FELCA	17 kDa	0	6	0	0
Uncharacterized protein OS=Felis catus GN=IFIT5 PE=4 SV=1	tr|M3X503|M3X503_FELCA	56 kDa	0	0	3	0
Uncharacterized protein OS=Felis catus PE=4 SV=1	tr|M3X5B6|M3X5B6_FELCA	46 kDa	0	0	0	2
NAD(P)(+)--arginine ADP-ribosyltransferase OS=Felis catus GN=ART3 PE=3 SV=1	tr|M3X5Q8|M3X5Q8_FELCA	44 kDa	0	0	7	0
Uncharacterized protein OS=Felis catus PE=4 SV=1	tr|M3X5X6|M3X5X6_FELCA	30 kDa	0	0	0	7
Aminopeptidase OS=Felis catus GN=NPEPPS PE=3 SV=1	tr|M3X5Z4|M3X5Z4_FELCA	94 kDa	0	0	0	27
COP9 signalosome subunit 3 OS=Felis catus GN=COPS3 PE=4 SV=1	tr|M3X663|M3X663_FELCA	48 kDa	0	4	0	0
Adipocyte plasma membrane associated protein OS=Felis catus GN=APMAP PE=4 SV=1	tr|M3X681|M3X681_FELCA	46 kDa	0	34	0	0
Cullin associated and neddylation dissociated 1 OS=Felis catus GN=CAND1 PE=4 SV=1	tr|M3X6G0|M3X6G0_FELCA	136 kDa	0	0	0	29
Adenylosuccinate synthetase isozyme 2 OS=Felis catus GN=ADSS PE=3 SV=1	tr|M3X6H1|M3X6H1_FELCA	46 kDa	0	9	0	0
Sec1 family domain containing 1 OS=Felis catus GN=SCFD1 PE=3 SV=1	tr|M3X6J7|M3X6J7_FELCA (+1)	72 kDa	0	0	4	0
Elongator complex protein 3 OS=Felis catus GN=ELP3 PE=3 SV=1	tr|M3X6K4|M3X6K4_FELCA	62 kDa	0	0	4	0
ATPase H+ transporting V1 subunit A OS=Felis catus GN=ATP6V1A PE=3 SV=1	tr|M3X6U5|M3X6U5_FELCA	68 kDa	0	0	4	0
Aspartate aminotransferase OS=Felis catus GN=GOT1 PE=4 SV=1	tr|M3X6W4|M3X6W4_FELCA	45 kDa	0	8	0	0
ST3 beta-galactoside alpha-2,3-sialyltransferase 1 OS=Felis catus GN=ST3GAL1 PE=3 SV=1	tr|M3X6X4|M3X6X4_FELCA	39 kDa	0	0	4	0
Eukaryotic translation initiation factor 3 subunit I OS=Felis catus GN=EIF3I PE=3 SV=1	tr|M3X6Y9|M3X6Y9_FELCA	36 kDa	0	11	0	0
Serine/threonine-protein phosphatase OS=Felis catus GN=PPP3CA PE=3 SV=1	tr|M3X780|M3X780_FELCA	58 kDa	0	0	6	0
Uncharacterized protein OS=Felis catus GN=ALDH2 PE=3 SV=1	tr|M3X7B5|M3X7B5_FELCA	56 kDa	0	8	18	0
Uncharacterized protein OS=Felis catus PE=4 SV=1	tr|M3X7F9|M3X7F9_FELCA	26 kDa	0	0	4	0
Copine 3 OS=Felis catus GN=CPNE3 PE=4 SV=1	tr|M3X7N3|M3X7N3_FELCA	60 kDa	0	4	27	7
ALG2, alpha-1,3/1,6-mannosyltransferase OS=Felis catus GN=ALG2 PE=4 SV=1	tr|M3X7Q7|M3X7Q7_FELCA	47 kDa	0	4	0	0
STT3B, catalytic subunit of the oligosaccharyltransferase complex OS=Felis catus GN=STT3B PE=4 SV=1	tr|M3X7Z4|M3X7Z4_FELCA	83 kDa	0	7	0	0
Septin 7 OS=Felis catus GN=SEPT7 PE=3 SV=1	tr|M3X872|M3X872_FELCA	45 kDa	0	25	5	4
Endoplasmic reticulum oxidoreductase 1 alpha OS=Felis catus GN=ERO1A PE=4 SV=1	tr|M3X8L8|M3X8L8_FELCA	54 kDa	0	2	13	0
ABO, alpha 1-3-N-acetylgalactosaminyltransferase and alpha 1-3-galactosyltransferase OS=Felis catus GN=ABO PE=4 SV=1	tr|M3X8P5|M3X8P5_FELCA	41 kDa	0	3	0	0
DnaJ heat shock protein family (Hsp40) member A2 OS=Felis catus GN=DNAJA2 PE=4 SV=1	tr|M3X8T9|M3X8T9_FELCA	45 kDa	0	22	0	0
Triokinase and FMN cyclase OS=Felis catus GN=TKFC PE=4 SV=1	tr|M3X940|M3X940_FELCA	59 kDa	0	0	8	0
Eukaryotic translation initiation factor 3 subunit L OS=Felis catus GN=EIF3L PE=3 SV=1	tr|M3X955|M3X955_FELCA	71 kDa	0	0	28	0
Reticulon OS=Felis catus GN=RTN4 PE=4 SV=1	tr|M3X9G5|M3X9G5_FELCA	128 kDa	0	3	0	0
G protein subunit alpha 13 OS=Felis catus GN=GNA13 PE=4 SV=1	tr|M3X9G7|M3X9G7_FELCA	44 kDa	0	7	0	0
USO1 vesicle transport factor OS=Felis catus GN=USO1 PE=4 SV=1	tr|M3X9J6|M3X9J6_FELCA	107 kDa	0	0	0	29
Uncharacterized protein OS=Felis catus PE=4 SV=1	tr|M3X9P4|M3X9P4_FELCA	47 kDa	0	16	22	17
Importin 7 OS=Felis catus GN=IPO7 PE=4 SV=1	tr|M3XA23|M3XA23_FELCA	119 kDa	0	0	0	11
Mannosyl (alpha-1,6-)-glycoprotein beta-1,2-N-acetylglucosaminyltransferase OS=Felis catus GN=MGAT2 PE=4 SV=1	tr|M3XAB6|M3XAB6_FELCA	51 kDa	0	0	5	0
Transmembrane 9 superfamily member OS=Felis catus GN=TM9SF2 PE=3 SV=1	tr|M3XAN0|M3XAN0_FELCA	75 kDa	0	0	0	4
V-set and immunoglobulin domain containing 1 OS=Felis catus GN=VSIG1 PE=4 SV=1	tr|M3XAU7|M3XAU7_FELCA	41 kDa	0	2	0	0
Aldehyde dehydrogenase 7 family member A1 OS=Felis catus GN=ALDH7A1 PE=3 SV=1	tr|M3XAZ0|M3XAZ0_FELCA	59 kDa	0	2	14	2
Thioredoxin related transmembrane protein 3 OS=Felis catus GN=TMX3 PE=4 SV=1	tr|M3XB18|M3XB18_FELCA	52 kDa	0	0	7	0
Eukaryotic translation initiation factor 4A1 OS=Felis catus GN=EIF4A1 PE=3 SV=1	tr|M3XBC3|M3XBC3_FELCA	46 kDa	0	29	0	0
Chromosome 16 open reading frame 58 OS=Felis catus GN=C16orf58 PE=4 SV=1	tr|M3XBD1|M3XBD1_FELCA	51 kDa	0	2	0	0
Uncharacterized protein OS=Felis catus PE=4 SV=1	tr|M3XBH6|M3XBH6_FELCA	53 kDa	0	3	0	0
Ectonucleotide pyrophosphatase/phosphodiesterase 1 OS=Felis catus GN=ENPP1 PE=4 SV=1	tr|M3XBL3|M3XBL3_FELCA	97 kDa	0	0	0	13
Immunoglobulin heavy constant mu OS=Felis catus GN=IGHM PE=4 SV=1	tr|M3XBM6|M3XBM6_FELCA	55 kDa	0	0	0	16
Uncharacterized protein OS=Felis catus PE=4 SV=1	tr|M3XC38|M3XC38_FELCA	16 kDa	0	0	0	2
Calcium-transporting ATPase OS=Felis catus GN=ATP2A2 PE=3 SV=1	tr|M3XCL4|M3XCL4_FELCA	105 kDa	0	0	0	2
Uncharacterized protein OS=Felis catus GN=PAICS PE=3 SV=1	tr|M3XCP5|M3XCP5_FELCA	48 kDa	0	33	0	0
Caveolae associated protein 2 OS=Felis catus GN=CAVIN2 PE=4 SV=1	tr|M3XCQ8|M3XCQ8_FELCA	47 kDa	0	3	0	0
ADAM metallopeptidase domain 10 OS=Felis catus GN=ADAM10 PE=4 SV=1	tr|M3XCR4|M3XCR4_FELCA	83 kDa	0	0	3	0
Betaine--homocysteine S-methyltransferase OS=Felis catus GN=BHMT PE=4 SV=1	tr|M3XCT4|M3XCT4_FELCA	45 kDa	0	10	0	0
Uncharacterized protein OS=Felis catus PE=4 SV=1	tr|M3XDA5|M3XDA5_FELCA	70 kDa	0	0	0	9
Uncharacterized protein OS=Felis catus PE=4 SV=1	tr|M3XDH5|M3XDH5_FELCA	26 kDa	0	0	0	3
Serine/threonine-protein phosphatase OS=Felis catus GN=PPP1CB PE=3 SV=1	tr|M3XDH6|M3XDH6_FELCA	37 kDa	0	2	0	0
Cytochrome P450 family 1 subfamily B member 1 OS=Felis catus GN=CYP1B1 PE=3 SV=1	tr|M3XDH9|M3XDH9_FELCA	50 kDa	0	0	9	3
NAD(P)(+)--arginine ADP-ribosyltransferase OS=Felis catus GN=ART4 PE=3 SV=1	tr|M3XDK8|M3XDK8_FELCA	38 kDa	0	0	8	0
ARP1 actin-related protein 1 homolog B, centractin beta OS=Felis catus GN=ACTR1B PE=3 SV=1	tr|M3XDN6|M3XDN6_FELCA	42 kDa	0	31	0	0
Transmembrane protein 30A OS=Felis catus GN=TMEM30A PE=4 SV=1	tr|M3XDP7|M3XDP7_FELCA	44 kDa	0	0	6	0
G protein subunit alpha 11 OS=Felis catus GN=GNA11 PE=4 SV=1	tr|M3XDT0|M3XDT0_FELCA	36 kDa	0	10	0	0
Obg-like ATPase 1 OS=Felis catus GN=OLA1 PE=3 SV=1	tr|M3XDU4|M3XDU4_FELCA	45 kDa	0	3	0	0
Espin OS=Felis catus GN=ESPN PE=4 SV=1	tr|M3XDX1|M3XDX1_FELCA	77 kDa	0	0	0	6
Cysteine rich with EGF like domains 1 OS=Felis catus GN=CRELD1 PE=4 SV=1	tr|M3XDZ1|M3XDZ1_FELCA	45 kDa	0	5	0	0
Thioredoxin domain containing 5 OS=Felis catus GN=TXNDC5 PE=3 SV=1	tr|M3XE00|M3XE00_FELCA	36 kDa	0	16	9	0
Aspartate aminotransferase OS=Felis catus GN=GOT2 PE=4 SV=1	tr|M3XE42|M3XE42_FELCA	48 kDa	0	4	0	0
Uncharacterized protein OS=Felis catus PE=4 SV=1	tr|M3XE86|M3XE86_FELCA	27 kDa	0	7	0	3
tRNA-splicing ligase RtcB homolog OS=Felis catus GN=RTCB PE=3 SV=1	tr|M3XE87|M3XE87_FELCA	55 kDa	0	6	29	0
Uncharacterized protein OS=Felis catus GN=HSD3B2 PE=3 SV=1	tr|M3XEC5|M3XEC5_FELCA	42 kDa	0	2	0	0
Uncharacterized protein OS=Felis catus PE=4 SV=1	tr|M3XED7|M3XED7_FELCA	62 kDa	0	0	0	4
VPS26, retromer complex component A OS=Felis catus GN=VPS26A PE=4 SV=1	tr|M3XEG2|M3XEG2_FELCA	42 kDa	0	2	0	0
3'(2'), 5'-bisphosphate nucleotidase 1 OS=Felis catus GN=BPNT1 PE=4 SV=1	tr|M3XEI7|M3XEI7_FELCA	33 kDa	0	8	0	0
Uncharacterized protein OS=Felis catus PE=4 SV=1	tr|M3XEJ0|M3XEJ0_FELCA	19 kDa	0	4	0	0
Uncharacterized protein OS=Felis catus PE=4 SV=1	tr|M3XEQ3|M3XEQ3_FELCA	28 kDa	0	0	0	3
COP9 signalosome subunit 2 OS=Felis catus GN=COPS2 PE=4 SV=1	tr|M3XER3|M3XER3_FELCA	52 kDa	0	11	0	0
BCL2 associated athanogene 5 OS=Felis catus GN=BAG5 PE=4 SV=1	tr|M3XEZ1|M3XEZ1_FELCA	51 kDa	0	4	0	0
Septin 11 OS=Felis catus GN=SEPT11 PE=3 SV=1	tr|M3XF82|M3XF82_FELCA	50 kDa	0	6	13	0
DnaJ heat shock protein family (Hsp40) member A4 OS=Felis catus GN=DNAJA4 PE=4 SV=1	tr|M3XFD2|M3XFD2_FELCA	40 kDa	0	6	0	0
Protein kinase cAMP-dependent type II regulatory subunit beta OS=Felis catus GN=PRKAR2B PE=4 SV=1	tr|M3XFF2|M3XFF2_FELCA	47 kDa	0	3	11	0
Tubulin beta chain OS=Felis catus GN=TUBB6 PE=3 SV=1	tr|M3XFN3|M3XFN3_FELCA	50 kDa	0	24	0	0
Pleckstrin homology domain containing O2 OS=Felis catus GN=PLEKHO2 PE=4 SV=1	tr|M3XFT1|M3XFT1_FELCA	54 kDa	0	0	0	2
Mitogen-activated protein kinase OS=Felis catus GN=MAPK1 PE=3 SV=1	tr|M3XFY0|M3XFY0_FELCA	41 kDa	0	9	0	0
Programmed cell death 6 interacting protein OS=Felis catus GN=PDCD6IP PE=4 SV=1	tr|M3XG34|M3XG34_FELCA	89 kDa	0	0	0	24
A-kinase anchoring protein 12 OS=Felis catus GN=AKAP12 PE=4 SV=1	tr|M3XG39|M3XG39_FELCA	180 kDa	0	0	0	5
Uncharacterized protein OS=Felis catus PE=4 SV=1	tr|M3XG47|M3XG47_FELCA	21 kDa	0	2	0	5
Uncharacterized protein OS=Felis catus GN=CRYZ PE=4 SV=1	tr|M3XG55|M3XG55_FELCA	35 kDa	0	2	0	0
Malic enzyme OS=Felis catus GN=ME1 PE=3 SV=1	tr|M3XGA0|M3XGA0_FELCA	55 kDa	0	0	2	0
